# Supplementary material for: Insights into the Evolutionary Features of Human Neurodegenerative Diseases
Source: PLoS One. 2012 Oct 30;7(10):e48336. doi: 10.1371/journal.pone.0048336 (PMC3484049; doi:10.1371/journal.pone.0048336)
Supplement: Table S1 — List of human neurodegenerative disease genes and non-disease genes used in this study. (XLS) [file pone.0048336.s001.xls]

## Sheet: Sheet1
Table S1: List of human neurodegenerative disease genes (375) and non-disease genes (7578) used in this study
Serial no.	Ensembl_id	Name	Neurodegenerative Disease Names		Serial no.	Ensembl Gene ID	Gene_name	Type
1	ENSG00000002330	BAD	Alzheimer's disease		1	ENSG00000000003	TSPAN6	Non-disease gene
2	ENSG00000003056	M6PR	Alzheimer's disease		2	ENSG00000000457	SCYL3	Non-disease gene
3	ENSG00000003393	ALS2	Amyotrophic laterla sclerosis		3	ENSG00000000460	C1orf112	Non-disease gene
4	ENSG00000006128	TAC1	Alzheimer's disease, Rett syndrome		4	ENSG00000001460	C1orf201	Non-disease gene
5	ENSG00000006210	CX3CL1	Alzheimer's disease		5	ENSG00000001461	NIPAL3	Non-disease gene
6	ENSG00000006695	COX10	Leigh syndrome, Charcot-Marie-Tooth disease		6	ENSG00000001497	LAS1L	Non-disease gene
7	ENSG00000007047	MARK4	Alzheimer's disease		7	ENSG00000001561	ENPP4	Non-disease gene
8	ENSG00000011465	DCN	Alzheimer's disease		8	ENSG00000001629	ANKIB1	Non-disease gene
9	ENSG00000011485	PPP5C	Alzheimer's disease		9	ENSG00000002587	HS3ST1	Non-disease gene
10	ENSG00000012223	LTF	Alzheimer's disease		10	ENSG00000002746	HECW1	Non-disease gene
11	ENSG00000019991	HGF	Alzheimer's disease		11	ENSG00000002919	SNX11	Non-disease gene
12	ENSG00000021574	SPAST	Amyotrophic lateral sclerosis, Spastic paraplegia		12	ENSG00000002933	TMEM176A	Non-disease gene
13	ENSG00000026103	FAS	Alzheimer's disease		13	ENSG00000003096	KLHL13	Non-disease gene
14	ENSG00000034053	APBA2	Alzheimer's disease		14	ENSG00000003249	DBNDD1	Non-disease gene
15	ENSG00000034677	RNF19A	Amyotrophic laterla sclerosis		15	ENSG00000003987	MTMR7	Non-disease gene
16	ENSG00000036530	CYP46A1	Alzheimer's disease		16	ENSG00000004059	ARF5	Non-disease gene
17	ENSG00000038945	MSR1	Alzheimer's disease		17	ENSG00000004399	PLXND1	Non-disease gene
18	ENSG00000042088	TDP1	Spinocerebellar ataxia		18	ENSG00000004487	KDM1A	Non-disease gene
19	ENSG00000043591	ADRB1	Alzheimer's disease		19	ENSG00000004660	CAMKK1	Non-disease gene
20	ENSG00000047457	CP	Parkinson's disease		20	ENSG00000004766	CCDC132	Non-disease gene
21	ENSG00000050165	DKK3	Schizophrenia		21	ENSG00000004777	ARHGAP33	Non-disease gene
22	ENSG00000054523	KIF1B	Charcot-Marie-Tooth disease		22	ENSG00000004809	SLC22A16	Non-disease gene
23	ENSG00000061676	NCKAP1	Alzheimer's disease		23	ENSG00000004975	DVL2	Non-disease gene
24	ENSG00000064012	CASP8	Alzheimer's disease, Parkinson's disease		24	ENSG00000005001	PRSS22	Non-disease gene
25	ENSG00000064300	NGFR	Alzheimer's disease, Amyotrophic lateral sclerosis, Multiple sclerosis		25	ENSG00000005007	UPF1	Non-disease gene
26	ENSG00000064692	SNCAIP	Alzheimer's disease, Parkinson's disease		26	ENSG00000005020	SKAP2	Non-disease gene
27	ENSG00000065609	SNAP91	Alzheimer's disease		27	ENSG00000005059	CCDC109B	Non-disease gene
28	ENSG00000065621	GSTO2	Alzheimer's disease, Parkinson's disease		28	ENSG00000005100	DHX33	Non-disease gene
29	ENSG00000067182	TNFRSF1A	Alzheimer's disease		29	ENSG00000005175	RPAP3	Non-disease gene
30	ENSG00000067715	SYT1	Alzheimer's disease		30	ENSG00000005189	AC004381.6	Non-disease gene
31	ENSG00000068615	REEP1	Spastic paraplegia		31	ENSG00000005206	AC004410.1	Non-disease gene
32	ENSG00000069696	DRD4	Alzheimer's disease, Schizophrenia, Parkinson's disease		32	ENSG00000005238	KIAA1539	Non-disease gene
33	ENSG00000070018	LRP6	Alzheimer's disease		33	ENSG00000005243	COPZ2	Non-disease gene
34	ENSG00000070061	IKBKAP	Familial dysautonomia		34	ENSG00000005302	MSL3	Non-disease gene
35	ENSG00000070748	CHAT	Alzheimer's disease, Amyotrophic lateral sclerosis		35	ENSG00000005379	BZRAP1	Non-disease gene
36	ENSG00000073008	PVR	Amyotrophic lateral sclerosis, Spinal muscular atrophy, Schizophrenia		36	ENSG00000005448	WDR54	Non-disease gene
37	ENSG00000073756	PTGS2	Alzheimer's disease, Parkinson's disease		37	ENSG00000005486	RHBDD2	Non-disease gene
38	ENSG00000073921	PICALM	Alzheimer's disease		38	ENSG00000005700	IBTK	Non-disease gene
39	ENSG00000074317	SNCB	Alzheimer's disease		39	ENSG00000005812	FBXL3	Non-disease gene
40	ENSG00000075711	DLG1	Schizophrenia		40	ENSG00000005981	ASB4	Non-disease gene
41	ENSG00000078018	MAP2	Alzheimer's disease, Rett syndrome		41	ENSG00000006007	GDE1	Non-disease gene
42	ENSG00000078401	EDN1	Alzheimer's disease		42	ENSG00000006015	C19orf60	Non-disease gene
43	ENSG00000078579	FGF20	Parkinson's disease		43	ENSG00000006025	OSBPL7	Non-disease gene
44	ENSG00000079215	SLC1A3	Alzheimer's disease, Creutzfeldt-Jakob, Multiple sclerosis		44	ENSG00000006042	TMEM98	Non-disease gene
45	ENSG00000079805	DNM2	Alzheimer's disease, Charcot-Marie-Tooth disease		45	ENSG00000006114	SYNRG	Non-disease gene
46	ENSG00000080644	CHRNA3	Parkinson's disease, Alzheimer's disease		46	ENSG00000006118	TMEM132A	Non-disease gene
47	ENSG00000082556	OPRK1	Alzheimer's disease, Parkinson's disease		47	ENSG00000006125	AP2B1	Non-disease gene
48	ENSG00000085377	PREP	Alzheimer's disease		48	ENSG00000006194	ZNF263	Non-disease gene
49	ENSG00000087053	MTMR2	Charcot-Marie-Tooth disease		49	ENSG00000006282	SPATA20	Non-disease gene
50	ENSG00000087088	BAX	Alzheimer's disease, Parkinson's disease		50	ENSG00000006377	DLX6	Non-disease gene
51	ENSG00000089199	CHGB	Alzheimer's disease, Multiple sclerosis, Schizophrenia		51	ENSG00000006432	MAP3K9	Non-disease gene
52	ENSG00000089250	NOS1	Alzheimer's disease, Parkinson's disease, Huntington's disease		52	ENSG00000006453	BAIAP2L1	Non-disease gene
53	ENSG00000091513	TF	Alzheimer's disease		53	ENSG00000006459	JHDM1D	Non-disease gene
54	ENSG00000092969	TGFB2	Alzheimer's disease		54	ENSG00000006555	TTC22	Non-disease gene
55	ENSG00000095321	CRAT	Alzheimer's disease		55	ENSG00000006576	PHTF2	Non-disease gene
56	ENSG00000095970	TREM2	Multiple sclerosis		56	ENSG00000006607	FARP2	Non-disease gene
57	ENSG00000100292	HMOX1	Alzheimer's disease, Parkinson's disease		57	ENSG00000006715	VPS41	Non-disease gene
58	ENSG00000100299	ARSA	Alzheimer's disease		58	ENSG00000006740	ARHGAP44	Non-disease gene
59	ENSG00000100412	ACO2	Parkinson's disease		59	ENSG00000006747	SCIN	Non-disease gene
60	ENSG00000100427	MLC1	Schizophrenia		60	ENSG00000007001	UPP2	Non-disease gene
61	ENSG00000100604	CHGA	Alzheimer's disease		61	ENSG00000007038	PRSS21	Non-disease gene
62	ENSG00000100979	PLTP	Alzheimer's disease		62	ENSG00000007080	CCDC124	Non-disease gene
63	ENSG00000100985	MMP9	Alzheimer's disease		63	ENSG00000007237	GAS7	Non-disease gene
64	ENSG00000101017	CD40	Alzheimer's disease		64	ENSG00000007255	TRAPPC6A	Non-disease gene
65	ENSG00000101180	HRH3	Huntington's disease, Parkinson's disease		65	ENSG00000007341	ST7L	Non-disease gene
66	ENSG00000101200	AVP	Alzheimer's disease		66	ENSG00000007350	TKTL1	Non-disease gene
67	ENSG00000101204	CHRNA4	Alzheimer's disease		67	ENSG00000007376	RPUSD1	Non-disease gene
68	ENSG00000101439	CST3	Alzheimer's disease		68	ENSG00000007384	RHBDF1	Non-disease gene
69	ENSG00000102871	TRADD	Alzheimer's disease		69	ENSG00000007516	BAIAP3	Non-disease gene
70	ENSG00000103197	TSC2	Alzheimer's disease		70	ENSG00000007520	C16orf42	Non-disease gene
71	ENSG00000103740	ACSBG1	Adrenoleukodystrophy		71	ENSG00000007541	PIGQ	Non-disease gene
72	ENSG00000104267	CA2	Alzheimer's disease		72	ENSG00000007545	CRAMP1L	Non-disease gene
73	ENSG00000104327	CALB1	Alzheimer's disease, Parkinson's disease, Huntington's disease		73	ENSG00000007866	TEAD3	Non-disease gene
74	ENSG00000104381	GDAP1	Charcot-Marie-Tooth disease		74	ENSG00000008118	CAMK1G	Non-disease gene
75	ENSG00000104687	GSR	Alzheimer's disease		75	ENSG00000008128	CDK11A	Non-disease gene
76	ENSG00000104722	NEFM	Alzheimer's disease, Parkinson's disease, Schizophrenia		76	ENSG00000008130	NADK	Non-disease gene
77	ENSG00000104755	ADAM2	Alzheimer's disease		77	ENSG00000008197	TFAP2D	Non-disease gene
78	ENSG00000104774	MAN2B1	Alzheimer's disease		78	ENSG00000008256	CYTH3	Non-disease gene
79	ENSG00000104879	CKM	Myotonic dystrophy		79	ENSG00000008277	ADAM22	Non-disease gene
80	ENSG00000104884	ERCC2	Alzheimer's disease		80	ENSG00000008283	CYB561	Non-disease gene
81	ENSG00000104936	DMPK	Myotonic dystrophy		81	ENSG00000008323	PLEKHG6	Non-disease gene
82	ENSG00000105227	PRX	Charcot-Marie-Tooth disease		82	ENSG00000008382	MPND	Non-disease gene
83	ENSG00000105290	APLP1	Alzheimer's disease		83	ENSG00000008516	MMP25	Non-disease gene
84	ENSG00000105329	TGFB1	Parkinson's disease		84	ENSG00000008735	MAPK8IP2	Non-disease gene
85	ENSG00000105376	ICAM5	Alzheimer's disease		85	ENSG00000008838	MED24	Non-disease gene
86	ENSG00000105649	RAB3A	Alzheimer's disease		86	ENSG00000009780	FAM76A	Non-disease gene
87	ENSG00000105723	GSK3A	Schizophrenia		87	ENSG00000009790	TRAF3IP3	Non-disease gene
88	ENSG00000105852	PON3	Amyotrophic laterla sclerosis		88	ENSG00000009844	VTA1	Non-disease gene
89	ENSG00000105854	PON2	Alzheimer's disease, Amyotrophic lateral sclerosis		89	ENSG00000010072	C1orf124	Non-disease gene
90	ENSG00000105880	DLX5	Rett syndrome		90	ENSG00000010165	METTL13	Non-disease gene
91	ENSG00000105894	PTN	Alzheimer's disease		91	ENSG00000010219	DYRK4	Non-disease gene
92	ENSG00000105953	OGDH	Alzheimer's disease		92	ENSG00000010270	STARD3NL	Non-disease gene
93	ENSG00000106144	CASP2	Alzheimer's disease		93	ENSG00000010282	HHATL	Non-disease gene
94	ENSG00000106211	HSPB1	Alzheimer's disease		94	ENSG00000010295	IFFO1	Non-disease gene
95	ENSG00000106268	NUDT1	Parkinson's disease		95	ENSG00000010318	PHF7	Non-disease gene
96	ENSG00000106299	WASL	Alzheimer's disease		96	ENSG00000010319	SEMA3G	Non-disease gene
97	ENSG00000106804	C5	Alzheimer's disease		97	ENSG00000010379	SLC6A13	Non-disease gene
98	ENSG00000107282	APBA1	Alzheimer's disease, Friedreich ataxia		98	ENSG00000010626	LRRC23	Non-disease gene
99	ENSG00000107317	PTGDS	Alzheimer's disease		99	ENSG00000010803	SCMH1	Non-disease gene
100	ENSG00000107643	MAPK8	Alzheimer's disease		100	ENSG00000011083	SLC6A7	Non-disease gene
101	ENSG00000107815	C10orf2	Spinocerebellar ataxia, Parkinson's disease		101	ENSG00000011105	TSPAN9	Non-disease gene
102	ENSG00000107984	DKK1	Alzheimer's disease		102	ENSG00000011114	BTBD7	Non-disease gene
103	ENSG00000108342	CSF3	Alzheimer's disease		103	ENSG00000011132	APBA3	Non-disease gene
104	ENSG00000108381	ASPA	Canavan disease		104	ENSG00000011258	MBTD1	Non-disease gene
105	ENSG00000108557	RAI1	Spinocerebellar ataxia		105	ENSG00000011275	RNF216	Non-disease gene
106	ENSG00000108684	ACCN1	Mutiple sclerosis		106	ENSG00000011332	DPF1	Non-disease gene
107	ENSG00000108984	MAP2K6	Alzheimer's disease		107	ENSG00000011426	ANLN	Non-disease gene
108	ENSG00000109099	PMP22	Charcot-Marie-Tooth disease		108	ENSG00000011451	WIZ	Non-disease gene
109	ENSG00000109339	MAPK10	Alzheimer's disease		109	ENSG00000011478	QPCTL	Non-disease gene
110	ENSG00000109501	WFS1	Wolfram syndrome		110	ENSG00000011566	MAP4K3	Non-disease gene
111	ENSG00000109861	CTSC	Alzheimer's disease		111	ENSG00000011638	TMEM159	Non-disease gene
112	ENSG00000110244	APOA4	Alzheimer's disease		112	ENSG00000012822	CALCOCO1	Non-disease gene
113	ENSG00000110436	SLC1A2	Schizophrenia		113	ENSG00000013016	EHD3	Non-disease gene
114	ENSG00000110680	CALCA	Familial dysautonomia		114	ENSG00000013275	PSMC4	Non-disease gene
115	ENSG00000110844	PRPF40B	Huntington's disease		115	ENSG00000013288	MAN2B2	Non-disease gene
116	ENSG00000111275	ALDH2	Alzheimer's disease		116	ENSG00000013293	SLC7A14	Non-disease gene
117	ENSG00000111361	EIF2B1	Leukoencephalopathy		117	ENSG00000013374	NUB1	Non-disease gene
118	ENSG00000111424	VDR	Mutiple sclerosis		118	ENSG00000013375	PGM3	Non-disease gene
119	ENSG00000111674	ENO2	Alzheimer's disease, Multiple sclerosis		119	ENSG00000013392	RWDD2A	Non-disease gene
120	ENSG00000111676	ATN1	Myoclonic epilepsy , Schizophrenia		120	ENSG00000013523	ANGEL1	Non-disease gene
121	ENSG00000111859	NEDD9	Alzheimer's disease, Parkinson's disease		121	ENSG00000013588	GPRC5A	Non-disease gene
122	ENSG00000112038	OPRM1	Alzheimer's disease, Parkinson's disease		122	ENSG00000014138	POLA2	Non-disease gene
123	ENSG00000112096	SOD2	Schizophrenia		123	ENSG00000015153	YAF2	Non-disease gene
124	ENSG00000112290	WASF1	Alzheimer's disease		124	ENSG00000015413	DPEP1	Non-disease gene
125	ENSG00000112530	PACRG	Parkinson's disease		125	ENSG00000015592	STMN4	Non-disease gene
126	ENSG00000112541	PDE10A	Huntington's disease		126	ENSG00000015676	NUDCD3	Non-disease gene
127	ENSG00000112715	VEGFA	Alzheimer's disease		127	ENSG00000016391	CHDH	Non-disease gene
128	ENSG00000112936	C7	Alzheimer's disease		128	ENSG00000016864	GLT8D1	Non-disease gene
129	ENSG00000113108	APBB3	Alzheimer's disease		129	ENSG00000017483	SLC38A5	Non-disease gene
130	ENSG00000113161	HMGCR	Alzheimer's disease		130	ENSG00000017621	MAGIX	Non-disease gene
131	ENSG00000113520	IL4	Spastic paraplegia, Mutiple sclerosis		131	ENSG00000018408	WWTR1	Non-disease gene
132	ENSG00000113525	IL5	Mutiple sclerosis		132	ENSG00000018610	CXorf56	Non-disease gene
133	ENSG00000113578	FGF1	Alzheimer's disease		133	ENSG00000018699	TTC27	Non-disease gene
134	ENSG00000113600	C9	Alzheimer's disease		134	ENSG00000019102	VSIG2	Non-disease gene
135	ENSG00000113749	HRH2	Schizophrenia		135	ENSG00000019144	PHLDB1	Non-disease gene
136	ENSG00000113758	DBN1	Alzheimer's disease		136	ENSG00000019169	MARCO	Non-disease gene
137	ENSG00000114026	OGG1	Parkinson's disease		137	ENSG00000019485	PRDM11	Non-disease gene
138	ENSG00000114200	BCHE	Alzheimer's disease		138	ENSG00000019505	SYT13	Non-disease gene
139	ENSG00000115008	IL1A	Alzheimer's disease		139	ENSG00000019995	ZRANB1	Non-disease gene
140	ENSG00000115041	KCNIP3	Alzheimer's disease		140	ENSG00000020129	NCDN	Non-disease gene
141	ENSG00000115138	POMC	Rett syndrome		141	ENSG00000020181	GPR124	Non-disease gene
142	ENSG00000115317	HTRA2	Parkinson's disease		142	ENSG00000020256	ZFP64	Non-disease gene
143	ENSG00000115590	IL1R2	Alzheimer's disease		143	ENSG00000020426	MNAT1	Non-disease gene
144	ENSG00000115665	SLC5A7	Alzheimer's disease		144	ENSG00000020577	SAMD4A	Non-disease gene
145	ENSG00000116133	DHCR24	Alzheimer's disease		145	ENSG00000021300	PLEKHB1	Non-disease gene
146	ENSG00000116329	OPRD1	Alzheimer's disease, Parkinson's disease		146	ENSG00000021762	OSBPL5	Non-disease gene
147	ENSG00000116396	KCNC4	Alzheimer's disease		147	ENSG00000021776	AQR	Non-disease gene
148	ENSG00000116604	MEF2D	Parkinson's disease		148	ENSG00000022567	SLC45A4	Non-disease gene
149	ENSG00000116701	NCF2	Alzheimer's disease		149	ENSG00000022976	ZNF839	Non-disease gene
150	ENSG00000117152	RGS4	Alzheimer's disease, Schizophrenia		150	ENSG00000023171	GRAMD1B	Non-disease gene
151	ENSG00000117298	ECE1	Alzheimer's disease		151	ENSG00000023843	ACCN5	Non-disease gene
152	ENSG00000117318	ID3	Rett syndrome		152	ENSG00000023902	PLEKHO1	Non-disease gene
153	ENSG00000117394	SLC2A1	Alzheimer's disease		153	ENSG00000024048	UBR2	Non-disease gene
154	ENSG00000117480	FAAH	Huntington's disease, Alzheimer's disease		154	ENSG00000025039	RRAGD	Non-disease gene
155	ENSG00000117525	F3	Alzheimer's disease		155	ENSG00000025156	HSF2	Non-disease gene
156	ENSG00000117560	FASLG	Alzheimer's disease, Multiple sclerosis		156	ENSG00000025423	HSD17B6	Non-disease gene
157	ENSG00000117594	HSD11B1	Myotonic dystrophy		157	ENSG00000025770	NCAPH2	Non-disease gene
158	ENSG00000117632	STMN1	Alzheimer's disease, Multiple sclerosis		158	ENSG00000025772	TOMM34	Non-disease gene
159	ENSG00000117984	CTSD	Alzheimer's disease		159	ENSG00000025800	KPNA6	Non-disease gene
160	ENSG00000118137	APOA1	Alzheimer's disease		160	ENSG00000026559	KCNG1	Non-disease gene
161	ENSG00000118217	ATF6	Parkinson's disease		161	ENSG00000026652	AGPAT4	Non-disease gene
162	ENSG00000118271	TTR	Alzheimer's disease		162	ENSG00000027869	SH2D2A	Non-disease gene
163	ENSG00000118523	CTGF	Alzheimer's disease		163	ENSG00000028116	VRK2	Non-disease gene
164	ENSG00000119689	DLST	Alzheimer's disease		164	ENSG00000028203	VEZT	Non-disease gene
165	ENSG00000120251	GRIA2	Schizophrenia		165	ENSG00000028310	BRD9	Non-disease gene
166	ENSG00000121858	TNFSF10	Mutiple sclerosis		166	ENSG00000028528	SNX1	Non-disease gene
167	ENSG00000122877	EGR2	Charcot-Marie-Tooth disease		167	ENSG00000029364	SLC39A9	Non-disease gene
168	ENSG00000123080	CDKN2C	Alzheimer's disease		168	ENSG00000030066	NUP160	Non-disease gene
169	ENSG00000123454	DBH	Parkinson's disease, Alzheimer's disease		169	ENSG00000031691	CENPQ	Non-disease gene
170	ENSG00000124164	VAPB	Amyotrophic laterla sclerosis, Spinal muscular atrophy		170	ENSG00000031823	RANBP3	Non-disease gene
171	ENSG00000124493	GRM4	Mutiple sclerosis		171	ENSG00000032389	TSSC1	Non-disease gene
172	ENSG00000124507	PACSIN1	Huntington's disease		172	ENSG00000033100	CHPF2	Non-disease gene
173	ENSG00000124788	ATXN1	Schizophrenia		173	ENSG00000033122	LRRC7	Non-disease gene
174	ENSG00000125733	TRIP10	Huntington's disease		174	ENSG00000033178	UBA6	Non-disease gene
175	ENSG00000126583	PRKCG	Spinocerebellar ataxia		175	ENSG00000033627	ATP6V0A1	Non-disease gene
176	ENSG00000127445	PIN1	Alzheimer's disease		176	ENSG00000034239	EFCAB1	Non-disease gene
177	ENSG00000128271	ADORA2A	Huntington's disease, Parkinson's disease		177	ENSG00000034533	ASTE1	Non-disease gene
178	ENSG00000128683	GAD1	Alzheimer's disease, Parkinson's disease, Schizophrenia		178	ENSG00000035499	DEPDC1B	Non-disease gene
179	ENSG00000128710	HOXD10	Charcot-Marie-Tooth disease		179	ENSG00000035664	DAPK2	Non-disease gene
180	ENSG00000129473	BCL2L2	Alzheimer's disease		180	ENSG00000035720	STAP1	Non-disease gene
181	ENSG00000130164	LDLR	Alzheimer's disease		181	ENSG00000035928	RFC1	Non-disease gene
182	ENSG00000131095	GFAP	Alzheimer's disease, Schizophrenia, Alexander disease, Multiple sclerosis		182	ENSG00000036448	MYOM2	Non-disease gene
183	ENSG00000131378	RFTN1	Alzheimer's disease		183	ENSG00000036672	USP2	Non-disease gene
184	ENSG00000131408	NR1H2	Alzheimer's disease		184	ENSG00000037042	TUBG2	Non-disease gene
185	ENSG00000131437	KIF3A	Amyotrophic laterla sclerosis		185	ENSG00000037637	FBXO42	Non-disease gene
186	ENSG00000131979	GCH1	Parkinson's disease		186	ENSG00000037749	MFAP3	Non-disease gene
187	ENSG00000132254	ARFIP2	Huntington's disease		187	ENSG00000037757	MRI1	Non-disease gene
188	ENSG00000132437	DDC	Parkinson's disease		188	ENSG00000037897	METTL1	Non-disease gene
189	ENSG00000132535	DLG4	Alzheimer's disease, Schizophrenia		189	ENSG00000038210	PI4K2B	Non-disease gene
190	ENSG00000132639	SNAP25	Schizophrenia		190	ENSG00000039319	ZFYVE16	Non-disease gene
191	ENSG00000132671	SSTR4	Alzheimer's disease		191	ENSG00000039523	FAM65A	Non-disease gene
192	ENSG00000132688	NES	Creutzfeldt-Jakob disease		192	ENSG00000039560	RAI14	Non-disease gene
193	ENSG00000132693	CRP	Alzheimer's disease		193	ENSG00000039600	SOX30	Non-disease gene
194	ENSG00000132703	APCS	Alzheimer's disease		194	ENSG00000039987	BEST2	Non-disease gene
195	ENSG00000133063	CHIT1	Alzheimer's disease, Multiple sclerosis		195	ENSG00000040275	CCDC99	Non-disease gene
196	ENSG00000133104	SPG20	Spastic paraplegia		196	ENSG00000040341	STAU2	Non-disease gene
197	ENSG00000133636	NTS	Alzheimer's disease, Parkinson's disease		197	ENSG00000040487	PQLC2	Non-disease gene
198	ENSG00000133812	SBF2	Charcot-Marie-Tooth disease		198	ENSG00000040633	PHF23	Non-disease gene
199	ENSG00000134057	CCNB1	Alzheimer's disease		199	ENSG00000040731	CDH10	Non-disease gene
200	ENSG00000134202	GSTM3	Alzheimer's disease, Multiple sclerosis		200	ENSG00000041353	RAB27B	Non-disease gene
201	ENSG00000134259	NGF	Alzheimer's disease, Multiple sclerosis		201	ENSG00000041515	MYO16	Non-disease gene
202	ENSG00000134352	IL6ST	Alzheimer's disease		202	ENSG00000041880	PARP3	Non-disease gene
203	ENSG00000134460	IL2RA	Parkinson's disease		203	ENSG00000041988	THAP3	Non-disease gene
204	ENSG00000134575	ACP2	Supranuclear palsy		204	ENSG00000042062	FAM65C	Non-disease gene
205	ENSG00000134640	MTNR1B	Alzheimer's disease		205	ENSG00000042286	AIFM2	Non-disease gene
206	ENSG00000134765	DSC1	Alzheimer's disease		206	ENSG00000042445	RETSAT	Non-disease gene
207	ENSG00000135018	UBQLN1	Alzheimer's disease		207	ENSG00000042493	CAPG	Non-disease gene
208	ENSG00000135457	TFCP2	Alzheimer's disease		208	ENSG00000043143	PHF15	Non-disease gene
209	ENSG00000135862	LAMC1	Alzheimer's disease		209	ENSG00000043462	LCP2	Non-disease gene
210	ENSG00000135919	SERPINE2	Alzheimer's disease		210	ENSG00000044459	CNTLN	Non-disease gene
211	ENSG00000136244	IL6	Alzheimer's disease		211	ENSG00000046647	GEMIN8	Non-disease gene
212	ENSG00000136381	IREB2	Friedreich ataxia		212	ENSG00000046653	GPM6B	Non-disease gene
213	ENSG00000136689	IL1RN	Alzheimer's disease		213	ENSG00000046889	PREX2	Non-disease gene
214	ENSG00000136827	TOR1A	Parkinson's disease		214	ENSG00000047056	WDR37	Non-disease gene
215	ENSG00000137845	ADAM10	Alzheimer's disease		215	ENSG00000047188	YTHDC2	Non-disease gene
216	ENSG00000137869	CYP19A1	Alzheimer's disease		216	ENSG00000047230	CTPS2	Non-disease gene
217	ENSG00000138135	CH25H	Alzheimer's disease		217	ENSG00000047346	KIAA1370	Non-disease gene
218	ENSG00000138160	KIF11	Alzheimer's disease		218	ENSG00000047365	ARAP2	Non-disease gene
219	ENSG00000138685	FGF2	Parkinson's disease		219	ENSG00000047578	KIAA0556	Non-disease gene
220	ENSG00000138792	ENPEP	Alzheimer's disease		220	ENSG00000047662	FAM184B	Non-disease gene
221	ENSG00000138794	CASP6	Alzheimer's disease		221	ENSG00000047932	GOPC	Non-disease gene
222	ENSG00000139132	FGD4	Charcot-Marie-Tooth disease		222	ENSG00000048028	USP28	Non-disease gene
223	ENSG00000139874	SSTR1	Alzheimer's disease		223	ENSG00000048162	NOP16	Non-disease gene
224	ENSG00000140009	ESR2	Alzheimer's disease		224	ENSG00000048405	ZNF800	Non-disease gene
225	ENSG00000140284	SLC27A2	Adrenoleukodystrophy		225	ENSG00000048471	SNX29	Non-disease gene
226	ENSG00000140287	HDC	Alzheimer's disease		226	ENSG00000048540	LMO3	Non-disease gene
227	ENSG00000140505	CYP1A2	Parkinson's disease		227	ENSG00000048649	RSF1	Non-disease gene
228	ENSG00000140538	NTRK3	Alzheimer's disease		228	ENSG00000048991	R3HDM1	Non-disease gene
229	ENSG00000140939	NOL3	Alzheimer's disease		229	ENSG00000049192	ADAMTS6	Non-disease gene
230	ENSG00000141404	GNAL	Huntington's disease, Parkinson's disease		230	ENSG00000049283	EPN3	Non-disease gene
231	ENSG00000141433	ADCYAP1	Schizophrenia		231	ENSG00000049769	PPP1R3F	Non-disease gene
232	ENSG00000141744	PNMT	Alzheimer's disease, Parkinson's disease, Multiple sclerosis		232	ENSG00000049883	PTCD2	Non-disease gene
233	ENSG00000142319	SLC6A3	Parkinson's disease		233	ENSG00000050130	JKAMP	Non-disease gene
234	ENSG00000143190	POU2F1	Alzheimer's disease		234	ENSG00000050344	NFE2L3	Non-disease gene
235	ENSG00000143801	PSEN2	Alzheimer's disease, Schizophrenia		235	ENSG00000050405	LIMA1	Non-disease gene
236	ENSG00000145192	AHSG	Alzheimer's disease		236	ENSG00000050426	LETMD1	Non-disease gene
237	ENSG00000145335	SNCA	Alzheimer's disease, Parkinson's disease		237	ENSG00000050730	TNIP3	Non-disease gene
238	ENSG00000145708	CRHBP	Alzheimer's disease		238	ENSG00000050767	COL23A1	Non-disease gene
239	ENSG00000146469	VIP	Alzheimer's disease		239	ENSG00000051009	FAM160A2	Non-disease gene
240	ENSG00000147571	CRH	Alzheimer's disease		240	ENSG00000051128	HOMER3	Non-disease gene
241	ENSG00000147588	PMP2	Charcot-Marie-Tooth disease		241	ENSG00000051596	THOC3	Non-disease gene
242	ENSG00000147852	VLDLR	Alzheimer's disease		242	ENSG00000051825	MPHOSPH9	Non-disease gene
243	ENSG00000148290	SURF1	Leigh syndrome		243	ENSG00000052126	PLEKHA5	Non-disease gene
244	ENSG00000148677	ANKRD1	Amyotrophic laterla sclerosis		244	ENSG00000052723	SIKE1	Non-disease gene
245	ENSG00000148798	INA	Spinocerebellar ataxia		245	ENSG00000052749	RRP12	Non-disease gene
246	ENSG00000148848	ADAM12	Alzheimer's disease		246	ENSG00000052795	FNIP2	Non-disease gene
247	ENSG00000149294	NCAM1	Alzheimer's disease, Schizophrenia		247	ENSG00000052841	TTC17	Non-disease gene
248	ENSG00000149295	DRD2	Huntington's disease, Alzheimer's disease		248	ENSG00000053254	FOXN3	Non-disease gene
249	ENSG00000150782	IL18	Mutiple sclerosis		249	ENSG00000053328	C6orf186	Non-disease gene
250	ENSG00000151224	MAT1A	Parkinson's disease		250	ENSG00000053372	MRTO4	Non-disease gene
251	ENSG00000151694	ADAM17	Mutiple sclerosis		251	ENSG00000053501	USE1	Non-disease gene
252	ENSG00000152137	HSPB8	Charcot-Marie-Tooth disease		252	ENSG00000053900	ANAPC4	Non-disease gene
253	ENSG00000152578	GRIA4	Alzheimer's disease, Schizophrenia		253	ENSG00000054118	THRAP3	Non-disease gene
254	ENSG00000153094	BCL2L11	Alzheimer's disease, Huntington's disease		254	ENSG00000054179	ENTPD2	Non-disease gene
255	ENSG00000153234	NR4A2	Parkinson's disease, Schizophrenia		255	ENSG00000054392	HHAT	Non-disease gene
256	ENSG00000154118	JPH3	Huntington's disease		256	ENSG00000054690	PLEKHH1	Non-disease gene
257	ENSG00000154734	ADAMTS1	Alzheimer's disease, Pick's disease		257	ENSG00000054793	ATP9A	Non-disease gene
258	ENSG00000155511	GRIA1	Alzheimer's disease, Schizophrenia		258	ENSG00000054796	SPO11	Non-disease gene
259	ENSG00000156475	PPP2R2B	Spinocerebellar ataxia		259	ENSG00000054803	CBLN4	Non-disease gene
260	ENSG00000156804	FBXO32	Amyotrophic lateral sclerosis		260	ENSG00000054938	CHRDL2	Non-disease gene
261	ENSG00000157540	DYRK1A	Alzheimer's disease		261	ENSG00000054965	FAM168A	Non-disease gene
262	ENSG00000157554	ERG	Alzheimer's disease		262	ENSG00000054967	RELT	Non-disease gene
263	ENSG00000157911	PEX10	Adrenoleukodystrophy		263	ENSG00000055044	NOP58	Non-disease gene
264	ENSG00000158258	CLSTN2	Alzheimer's disease		264	ENSG00000055070	C1orf144	Non-disease gene
265	ENSG00000158748	HTR6	Alzheimer's disease, Schizophrenia		265	ENSG00000055147	FAM114A2	Non-disease gene
266	ENSG00000158828	PINK1	Parkinson's disease		266	ENSG00000055163	CYFIP2	Non-disease gene
267	ENSG00000158874	APOA2	Parkinson's disease		267	ENSG00000055211	C6orf72	Non-disease gene
268	ENSG00000159200	RCAN1	Huntington's disease, Alzheimer's disease		268	ENSG00000055483	USP36	Non-disease gene
269	ENSG00000159403	C1R	Huntington's disease, Alzheimer's disease		269	ENSG00000055732	MCOLN3	Non-disease gene
270	ENSG00000160716	CHRNB2	Alzheimer's disease, Schizophrenia		270	ENSG00000055813	CCDC85A	Non-disease gene
271	ENSG00000161610	HCRT	Parkinson's disease		271	ENSG00000055950	MRPL43	Non-disease gene
272	ENSG00000161905	ALOX15	Alzheimer's disease		272	ENSG00000056277	ZNF280C	Non-disease gene
273	ENSG00000162009	SSTR5	Alzheimer's disease		273	ENSG00000056291	NPFFR2	Non-disease gene
274	ENSG00000162374	ELAVL4	Parkinson's disease		274	ENSG00000056487	PHF21B	Non-disease gene
275	ENSG00000162631	NTNG1	Rett syndrome, Schizophrenia		275	ENSG00000056586	RC3H2	Non-disease gene
276	ENSG00000162736	NCSTN	Alzheimer's disease		276	ENSG00000057019	DCBLD2	Non-disease gene
277	ENSG00000162928	PEX13	Adrenoleukodystrophy		277	ENSG00000057704	TMCC3	Non-disease gene
278	ENSG00000163032	VSNL1	Schizophrenia		278	ENSG00000057757	C1orf128	Non-disease gene
279	ENSG00000163131	CTSS	Alzheimer's disease		279	ENSG00000057935	MTA3	Non-disease gene
280	ENSG00000163536	SERPINI1	Alzheimer's disease		280	ENSG00000058056	USP13	Non-disease gene
281	ENSG00000163635	ATXN7	Spinocerebellar ataxia		281	ENSG00000058063	ATP11B	Non-disease gene
282	ENSG00000163697	APBB2	Alzheimer's disease		282	ENSG00000058091	CDK14	Non-disease gene
283	ENSG00000163931	TKT	Alzheimer's disease		283	ENSG00000058262	SEC61A1	Non-disease gene
284	ENSG00000163975	MFI2	Alzheimer's disease		284	ENSG00000058272	PPP1R12A	Non-disease gene
285	ENSG00000164305	CASP3	Alzheimer's disease		285	ENSG00000058335	RASGRF1	Non-disease gene
286	ENSG00000164418	GRIK2	Huntington's disease, Schizophrenia		286	ENSG00000058404	CAMK2B	Non-disease gene
287	ENSG00000165060	FXN	Huntington's disease, Parkinson's disease, Friedreich ataxia		287	ENSG00000058729	RIOK2	Non-disease gene
288	ENSG00000165338	HECTD2	Creutzfeldt-Jakob disease		288	ENSG00000058799	YIPF1	Non-disease gene
289	ENSG00000165795	NDRG2	Alzheimer's disease		289	ENSG00000058804	TMEM48	Non-disease gene
290	ENSG00000166165	CKB	Alzheimer's disease		290	ENSG00000059122	FLYWCH1	Non-disease gene
291	ENSG00000166206	GABRB3	Rett syndrome		291	ENSG00000059691	PET112L	Non-disease gene
292	ENSG00000166313	APBB1	Parkinson's disease, Alzheimer's disease		292	ENSG00000059758	CDK17	Non-disease gene
293	ENSG00000166501	PRKCB	Huntington's disease		293	ENSG00000059915	PSD	Non-disease gene
294	ENSG00000166741	NNMT	Parkinson's disease		294	ENSG00000060138	CSDA	Non-disease gene
295	ENSG00000166825	ANPEP	Mutiple sclerosis		295	ENSG00000060339	CCAR1	Non-disease gene
296	ENSG00000167755	KLK6	Alzheimer's disease, Multiple sclerosis		296	ENSG00000060558	GNA15	Non-disease gene
297	ENSG00000167815	PRDX2	Alzheimer's disease		297	ENSG00000060566	CREB3L3	Non-disease gene
298	ENSG00000168412	MTNR1A	Alzheimer's disease, Schizophrenia,		298	ENSG00000060656	PTPRU	Non-disease gene
299	ENSG00000168539	CHRM1	Alzheimer's disease, Parkinson's disease		299	ENSG00000060688	SNRNP40	Non-disease gene
300	ENSG00000168621	GDNF	Amyotrophic laterla sclerosis, Parkinson's disease		300	ENSG00000060709	RIMBP2	Non-disease gene
301	ENSG00000169247	SH3TC2	Charcot-Marie-Tooth disease		301	ENSG00000060749	QSER1	Non-disease gene
302	ENSG00000169252	ADRB2	Alzheimer's disease		302	ENSG00000061273	HDAC7	Non-disease gene
303	ENSG00000169375	SIN3A	Huntington's disease		303	ENSG00000061455	PRDM6	Non-disease gene
304	ENSG00000169598	DFFB	Huntington's disease		304	ENSG00000061492	WNT8A	Non-disease gene
305	ENSG00000169676	DRD5	Alzheimer's disease		305	ENSG00000061656	SPAG4	Non-disease gene
306	ENSG00000169783	LINGO1	Parkinson's disease, Multiple sclerosis		306	ENSG00000061918	GUCY1B3	Non-disease gene
307	ENSG00000169896	ITGAM	Alzheimer's disease, Multiple sclerosis		307	ENSG00000061936	SFRS8	Non-disease gene
308	ENSG00000170027	YWHAG	Alzheimer's disease, Creutzfeldt-Jakob disease		308	ENSG00000061938	TNK2	Non-disease gene
309	ENSG00000170312	CDK1	Alzheimer's disease		309	ENSG00000061987	MON2	Non-disease gene
310	ENSG00000170345	FOS	Alzheimer's disease		310	ENSG00000062194	GPBP1	Non-disease gene
311	ENSG00000170458	CD14	Alzheimer's disease		311	ENSG00000062282	DGAT2	Non-disease gene
312	ENSG00000170893	TRH	Alzheimer's disease, Multiple sclerosis		312	ENSG00000062370	ZFP112	Non-disease gene
313	ENSG00000171105	INSR	Alzheimer's disease, Myotonic dystrophy		313	ENSG00000062582	MRPS24	Non-disease gene
314	ENSG00000171132	PRKCE	Alzheimer's disease		314	ENSG00000062598	ELMO2	Non-disease gene
315	ENSG00000171189	GRIK1	Schizophrenia		315	ENSG00000062650	WAPAL	Non-disease gene
316	ENSG00000171368	TPPP	Parkinson's disease, Multiple system atrophy		316	ENSG00000062716	TMEM49	Non-disease gene
317	ENSG00000171552	BCL2L1	Alzheimer's disease		317	ENSG00000063180	CA11	Non-disease gene
318	ENSG00000171860	C3AR1	Huntington's disease, Mutiple sclerosis		318	ENSG00000063241	ISOC2	Non-disease gene
319	ENSG00000171862	PTEN	Alzheimer's disease		319	ENSG00000063245	EPN1	Non-disease gene
320	ENSG00000171864	PRND	Creutzfeldt-Jakob disease		320	ENSG00000063322	MED29	Non-disease gene
321	ENSG00000172009	THOP1	Alzheimer's disease		321	ENSG00000063587	ZNF275	Non-disease gene
322	ENSG00000172020	GAP43	Alzheimer's disease, Amyotrophic lateral sclerosis, Schizophrenia		322	ENSG00000063761	ADCK1	Non-disease gene
323	ENSG00000172137	CALB2	Schizophrenia		323	ENSG00000063978	RNF4	Non-disease gene
324	ENSG00000173020	ADRBK1	Alzheimer's disease		324	ENSG00000064042	LIMCH1	Non-disease gene
325	ENSG00000173221	GLRX	Alzheimer's disease		325	ENSG00000064102	C12orf11	Non-disease gene
326	ENSG00000173267	SNCG	Alzheimer's disease		326	ENSG00000064115	TM7SF3	Non-disease gene
327	ENSG00000173391	OLR1	Alzheimer's disease		327	ENSG00000064201	TSPAN32	Non-disease gene
328	ENSG00000173786	CNP	Schizophrenia		328	ENSG00000064218	DMRT3	Non-disease gene
329	ENSG00000173805	HAP1	Huntington's disease		329	ENSG00000064225	ST3GAL6	Non-disease gene
330	ENSG00000174482	LINGO2	Parkinson's disease		330	ENSG00000064270	ATP2C2	Non-disease gene
331	ENSG00000175445	LPL	Alzheimer's disease		331	ENSG00000064419	TNPO3	Non-disease gene
332	ENSG00000176697	BDNF	Alzheimer's disease, Huntington's disease, Parkinson's disease, Schizophrenia		332	ENSG00000064545	TMEM161A	Non-disease gene
333	ENSG00000176749	CDK5R1	Alzheimer's disease		333	ENSG00000064607	SUGP2	Non-disease gene
334	ENSG00000177425	PAWR	Schizophrenia		334	ENSG00000064652	SNX24	Non-disease gene
335	ENSG00000178394	HTR1A	Alzheimer's disease, Parkinson's disease, Schizophrenia		335	ENSG00000064666	CNN2	Non-disease gene
336	ENSG00000178568	ERBB4	Alzheimer's disease, Schizophrenia		336	ENSG00000064763	FAR2	Non-disease gene
337	ENSG00000179388	EGR3	Schizophrenia		337	ENSG00000064932	SBNO2	Non-disease gene
338	ENSG00000179841	AKAP5	Alzheimer's disease		338	ENSG00000065029	ZNF76	Non-disease gene
339	ENSG00000180176	TH	Supranuclear palsy, Parkinson's disease		339	ENSG00000065054	SLC9A3R2	Non-disease gene
340	ENSG00000180616	SSTR2	Alzheimer's disease		340	ENSG00000065060	UHRF1BP1	Non-disease gene
341	ENSG00000180720	CHRM4	Alzheimer's disease		341	ENSG00000065183	WDR3	Non-disease gene
342	ENSG00000181019	NQO1	Alzheimer's disease, Parkinson's disease		342	ENSG00000065268	WDR18	Non-disease gene
343	ENSG00000181072	CHRM2	Alzheimer's disease, Parkinson's disease, Huntington's disease		343	ENSG00000065325	GLP2R	Non-disease gene
344	ENSG00000181195	PENK	Parkinson's disease, Huntington's disease, Schizophrenia		344	ENSG00000065328	MCM10	Non-disease gene
345	ENSG00000182240	BACE2	Alzheimer's disease,		345	ENSG00000065413	ANKRD44	Non-disease gene
346	ENSG00000182621	PLCB1	Creutzfeldt-Jakob disease		346	ENSG00000065457	ADAT1	Non-disease gene
347	ENSG00000183230	CTNNA3	Alzheimer's disease, Multiple sclerosis		347	ENSG00000065485	PDIA5	Non-disease gene
348	ENSG00000183454	GRIN2A	Alzheimer's disease, Huntington's disease, Schizophrenia		348	ENSG00000065491	TBC1D22B	Non-disease gene
349	ENSG00000183473	SSTR3	Alzheimer's disease		349	ENSG00000065600	TMEM206	Non-disease gene
350	ENSG00000184371	CSF1	Alzheimer's disease		350	ENSG00000065615	CYB5R4	Non-disease gene
351	ENSG00000184674	GSTT1	Parkinson's disease		351	ENSG00000065665	SEC61A2	Non-disease gene
352	ENSG00000184845	DRD1	Neurodegenerative diseases		352	ENSG00000065717	TLE2	Non-disease gene
353	ENSG00000185345	PARK2	Parkinson's disease		353	ENSG00000065802	ASB1	Non-disease gene
354	ENSG00000185652	NTF3	Alzheimer's disease		354	ENSG00000065809	FAM107B	Non-disease gene
355	ENSG00000186318	BACE1	Alzheimer's disease		355	ENSG00000065883	CDC2L5	Non-disease gene
356	ENSG00000187091	PLCD1	Alzheimer's disease		356	ENSG00000066027	PPP2R5A	Non-disease gene
357	ENSG00000187094	CCK	Alzheimer's disease, Parkinson's disease, Schizophrenia, Huntington's disease		357	ENSG00000066032	CTNNA2	Non-disease gene
358	ENSG00000188517	COL25A1	Alzheimer's disease		358	ENSG00000066117	SMARCD1	Non-disease gene
359	ENSG00000188822	CNR2	Alzheimer's disease		359	ENSG00000066135	KDM4A	Non-disease gene
360	ENSG00000189067	LITAF	Charcot-Marie-Tooth disease		360	ENSG00000066185	ZMYND12	Non-disease gene
361	ENSG00000196188	CTSE	Alzheimer's disease		361	ENSG00000066230	SLC9A3	Non-disease gene
362	ENSG00000196549	MME	Alzheimer's disease		362	ENSG00000066248	NGEF	Non-disease gene
363	ENSG00000196639	HRH1	Alzheimer's disease		363	ENSG00000066294	CD84	Non-disease gene
364	ENSG00000197405	C5AR1	Alzheimer's disease, Multiple sclerosis		364	ENSG00000066322	ELOVL1	Non-disease gene
365	ENSG00000197471	SPN	Alzheimer's disease		365	ENSG00000066583	ISOC1	Non-disease gene
366	ENSG00000197912	SPG7	Spastic paraplegia		366	ENSG00000066651	TRMT11	Non-disease gene
367	ENSG00000197971	MBP	Alzheimer's disease, Multiple sclerosis		367	ENSG00000066697	C9orf30	Non-disease gene
368	ENSG00000198400	NTRK1	Alzheimer's disease		368	ENSG00000066735	KIF26A	Non-disease gene
369	ENSG00000198513	ATL1	Spastic paraplegia		369	ENSG00000066855	MTFR1	Non-disease gene
370	ENSG00000198739	LRRTM3	Alzheimer's disease		370	ENSG00000067113	PPAP2A	Non-disease gene
371	ENSG00000198959	TGM2	Alzheimer's disease, Huntington's disease		371	ENSG00000067141	NEO1	Non-disease gene
372	ENSG00000204842	ATXN2	Spinocerebellar ataxia, Parkinson's disease		372	ENSG00000067221	STOML1	Non-disease gene
373	ENSG00000205155	PSENEN	Alzheimer's disease		373	ENSG00000067365	C16orf68	Non-disease gene
374	ENSG00000213918	DNASE1	Alzheimer's disease		374	ENSG00000067445	TRO	Non-disease gene
375	ENSG00000214882	CCPG1	Alzheimer's disease		375	ENSG00000067533	RRP15	Non-disease gene
					376	ENSG00000067596	DHX8	Non-disease gene
					377	ENSG00000067829	IDH3G	Non-disease gene
					378	ENSG00000067840	PDZD4	Non-disease gene
					379	ENSG00000067842	ATP2B3	Non-disease gene
					380	ENSG00000068079	IFI35	Non-disease gene
					381	ENSG00000068097	HEATR6	Non-disease gene
					382	ENSG00000068120	COASY	Non-disease gene
					383	ENSG00000068137	PLEKHH3	Non-disease gene
					384	ENSG00000068308	OTUD5	Non-disease gene
					385	ENSG00000068354	TBC1D25	Non-disease gene
					386	ENSG00000068394	GPKOW	Non-disease gene
					387	ENSG00000068400	GRIPAP1	Non-disease gene
					388	ENSG00000068650	ATP11A	Non-disease gene
					389	ENSG00000068654	POLR1A	Non-disease gene
					390	ENSG00000068724	TTC7A	Non-disease gene
					391	ENSG00000068745	IP6K2	Non-disease gene
					392	ENSG00000068784	SRBD1	Non-disease gene
					393	ENSG00000068878	PSME4	Non-disease gene
					394	ENSG00000068912	ERLEC1	Non-disease gene
					395	ENSG00000069122	GPR116	Non-disease gene
					396	ENSG00000069345	DNAJA2	Non-disease gene
					397	ENSG00000069509	FUNDC1	Non-disease gene
					398	ENSG00000069712	KIAA1107	Non-disease gene
					399	ENSG00000069812	HES2	Non-disease gene
					400	ENSG00000070047	PHRF1	Non-disease gene
					401	ENSG00000070081	NUCB2	Non-disease gene
					402	ENSG00000070087	PFN2	Non-disease gene
					403	ENSG00000070159	PTPN3	Non-disease gene
					404	ENSG00000070190	DAPP1	Non-disease gene
					405	ENSG00000070214	SLC44A1	Non-disease gene
					406	ENSG00000070366	SMG6	Non-disease gene
					407	ENSG00000070367	EXOC5	Non-disease gene
					408	ENSG00000070388	FGF22	Non-disease gene
					409	ENSG00000070404	FSTL3	Non-disease gene
					410	ENSG00000070476	ZXDC	Non-disease gene
					411	ENSG00000070495	JMJD6	Non-disease gene
					412	ENSG00000070540	WIPI1	Non-disease gene
					413	ENSG00000070601	FRMPD1	Non-disease gene
					414	ENSG00000070718	AP3M2	Non-disease gene
					415	ENSG00000070759	TESK2	Non-disease gene
					416	ENSG00000070882	OSBPL3	Non-disease gene
					417	ENSG00000070950	RAD18	Non-disease gene
					418	ENSG00000071051	NCK2	Non-disease gene
					419	ENSG00000071073	MGAT4A	Non-disease gene
					420	ENSG00000071189	SNX13	Non-disease gene
					421	ENSG00000071205	ARHGAP10	Non-disease gene
					422	ENSG00000071242	RPS6KA2	Non-disease gene
					423	ENSG00000071246	VASH1	Non-disease gene
					424	ENSG00000071282	LMCD1	Non-disease gene
					425	ENSG00000071539	TRIP13	Non-disease gene
					426	ENSG00000071889	FAM3A	Non-disease gene
					427	ENSG00000071894	CPSF1	Non-disease gene
					428	ENSG00000071909	MYO3B	Non-disease gene
					429	ENSG00000072041	SLC6A15	Non-disease gene
					430	ENSG00000072071	LPHN1	Non-disease gene
					431	ENSG00000072080	SPP2	Non-disease gene
					432	ENSG00000072133	RPS6KA6	Non-disease gene
					433	ENSG00000072134	EPN2	Non-disease gene
					434	ENSG00000072135	PTPN18	Non-disease gene
					435	ENSG00000072163	LIMS2	Non-disease gene
					436	ENSG00000072201	LNX1	Non-disease gene
					437	ENSG00000072415	MPP5	Non-disease gene
					438	ENSG00000072422	RHOBTB1	Non-disease gene
					439	ENSG00000072518	MARK2	Non-disease gene
					440	ENSG00000072657	TRHDE	Non-disease gene
					441	ENSG00000072682	P4HA2	Non-disease gene
					442	ENSG00000072736	NFATC3	Non-disease gene
					443	ENSG00000072818	ACAP1	Non-disease gene
					444	ENSG00000072849	DERL2	Non-disease gene
					445	ENSG00000072858	SIDT1	Non-disease gene
					446	ENSG00000072864	NDE1	Non-disease gene
					447	ENSG00000072952	MRVI1	Non-disease gene
					448	ENSG00000072954	TMEM38A	Non-disease gene
					449	ENSG00000072958	AP1M1	Non-disease gene
					450	ENSG00000073146	MOV10L1	Non-disease gene
					451	ENSG00000073150	PANX2	Non-disease gene
					452	ENSG00000073331	ALPK1	Non-disease gene
					453	ENSG00000073350	LLGL2	Non-disease gene
					454	ENSG00000073417	PDE8A	Non-disease gene
					455	ENSG00000073536	NLE1	Non-disease gene
					456	ENSG00000073598	FNDC8	Non-disease gene
					457	ENSG00000073711	PPP2R3A	Non-disease gene
					458	ENSG00000073754	CD5L	Non-disease gene
					459	ENSG00000073803	MAP3K13	Non-disease gene
					460	ENSG00000074071	MRPS34	Non-disease gene
					461	ENSG00000074219	TEAD2	Non-disease gene
					462	ENSG00000074266	EED	Non-disease gene
					463	ENSG00000074276	PCDH24	Non-disease gene
					464	ENSG00000074356	C17orf85	Non-disease gene
					465	ENSG00000074527	NTN4	Non-disease gene
					466	ENSG00000074621	SLC24A1	Non-disease gene
					467	ENSG00000074657	ZNF532	Non-disease gene
					468	ENSG00000074696	PTPLAD1	Non-disease gene
					469	ENSG00000074706	IPCEF1	Non-disease gene
					470	ENSG00000074771	NOX3	Non-disease gene
					471	ENSG00000074855	ANO8	Non-disease gene
					472	ENSG00000074935	TUBE1	Non-disease gene
					473	ENSG00000074964	ARHGEF10L	Non-disease gene
					474	ENSG00000075035	WSCD2	Non-disease gene
					475	ENSG00000075089	ACTR6	Non-disease gene
					476	ENSG00000075131	TIPIN	Non-disease gene
					477	ENSG00000075151	EIF4G3	Non-disease gene
					478	ENSG00000075213	SEMA3A	Non-disease gene
					479	ENSG00000075218	GTSE1	Non-disease gene
					480	ENSG00000075234	TTC38	Non-disease gene
					481	ENSG00000075240	GRAMD4	Non-disease gene
					482	ENSG00000075303	SLC25A40	Non-disease gene
					483	ENSG00000075336	C18orf55	Non-disease gene
					484	ENSG00000075388	FGF4	Non-disease gene
					485	ENSG00000075391	RASAL2	Non-disease gene
					486	ENSG00000075399	C16orf7	Non-disease gene
					487	ENSG00000075429	CACNG5	Non-disease gene
					488	ENSG00000075461	CACNG4	Non-disease gene
					489	ENSG00000075673	ATP12A	Non-disease gene
					490	ENSG00000075790	BCAP29	Non-disease gene
					491	ENSG00000075826	SEC31B	Non-disease gene
					492	ENSG00000075884	ARHGAP15	Non-disease gene
					493	ENSG00000075914	EXOSC7	Non-disease gene
					494	ENSG00000075975	MKRN2	Non-disease gene
					495	ENSG00000076201	PTPN23	Non-disease gene
					496	ENSG00000076321	KLHL20	Non-disease gene
					497	ENSG00000076344	RGS11	Non-disease gene
					498	ENSG00000076356	PLXNA2	Non-disease gene
					499	ENSG00000076382	SPAG5	Non-disease gene
					500	ENSG00000076513	ANKRD13A	Non-disease gene
					501	ENSG00000076641	PAG1	Non-disease gene
					502	ENSG00000076650	GPATCH1	Non-disease gene
					503	ENSG00000076826	KIAA1543	Non-disease gene
					504	ENSG00000076864	RAP1GAP	Non-disease gene
					505	ENSG00000076924	XAB2	Non-disease gene
					506	ENSG00000076928	ARHGEF1	Non-disease gene
					507	ENSG00000077009	ITGB1BP3	Non-disease gene
					508	ENSG00000077080	ACTL6B	Non-disease gene
					509	ENSG00000077152	UBE2T	Non-disease gene
					510	ENSG00000077157	PPP1R12B	Non-disease gene
					511	ENSG00000077232	DNAJC10	Non-disease gene
					512	ENSG00000077274	CAPN6	Non-disease gene
					513	ENSG00000077348	EXOSC5	Non-disease gene
					514	ENSG00000077420	APBB1IP	Non-disease gene
					515	ENSG00000077454	LRCH4	Non-disease gene
					516	ENSG00000077458	FAM76B	Non-disease gene
					517	ENSG00000077463	SIRT6	Non-disease gene
					518	ENSG00000077514	POLD3	Non-disease gene
					519	ENSG00000077616	NAALAD2	Non-disease gene
					520	ENSG00000077713	SLC25A43	Non-disease gene
					521	ENSG00000077943	ITGA8	Non-disease gene
					522	ENSG00000077984	CST7	Non-disease gene
					523	ENSG00000078043	PIAS2	Non-disease gene
					524	ENSG00000078124	ACER3	Non-disease gene
					525	ENSG00000078177	N4BP2	Non-disease gene
					526	ENSG00000078237	C12orf5	Non-disease gene
					527	ENSG00000078304	PPP2R5C	Non-disease gene
					528	ENSG00000078487	ZCWPW1	Non-disease gene
					529	ENSG00000078589	P2RY10	Non-disease gene
					530	ENSG00000078596	ITM2A	Non-disease gene
					531	ENSG00000078687	AC021593.2	Non-disease gene
					532	ENSG00000078699	CBFA2T2	Non-disease gene
					533	ENSG00000078795	PKD2L2	Non-disease gene
					534	ENSG00000078804	TP53INP2	Non-disease gene
					535	ENSG00000078814	MYH7B	Non-disease gene
					536	ENSG00000078898	BPIL1	Non-disease gene
					537	ENSG00000078902	TOLLIP	Non-disease gene
					538	ENSG00000078967	UBE2D4	Non-disease gene
					539	ENSG00000079134	THOC1	Non-disease gene
					540	ENSG00000079150	FKBP7	Non-disease gene
					541	ENSG00000079156	OSBPL6	Non-disease gene
					542	ENSG00000079257	LXN	Non-disease gene
					543	ENSG00000079335	CDC14A	Non-disease gene
					544	ENSG00000079337	RAPGEF3	Non-disease gene
					545	ENSG00000079387	SENP1	Non-disease gene
					546	ENSG00000079393	DUSP13	Non-disease gene
					547	ENSG00000079689	SCGN	Non-disease gene
					548	ENSG00000079691	LRRC16A	Non-disease gene
					549	ENSG00000079819	EPB41L2	Non-disease gene
					550	ENSG00000079931	MOXD1	Non-disease gene
					551	ENSG00000079950	STX7	Non-disease gene
					552	ENSG00000080189	SLC35C2	Non-disease gene
					553	ENSG00000080200	CRYBG3	Non-disease gene
					554	ENSG00000080224	EPHA6	Non-disease gene
					555	ENSG00000080298	RFX3	Non-disease gene
					556	ENSG00000080511	RDH8	Non-disease gene
					557	ENSG00000080561	MID2	Non-disease gene
					558	ENSG00000080573	COL5A3	Non-disease gene
					559	ENSG00000080608	KIAA0020	Non-disease gene
					560	ENSG00000080709	KCNN2	Non-disease gene
					561	ENSG00000080822	CLDND1	Non-disease gene
					562	ENSG00000080839	RBL1	Non-disease gene
					563	ENSG00000080845	DLGAP4	Non-disease gene
					564	ENSG00000080854	IGSF9B	Non-disease gene
					565	ENSG00000081019	RSBN1	Non-disease gene
					566	ENSG00000081026	MAGI3	Non-disease gene
					567	ENSG00000081138	CDH7	Non-disease gene
					568	ENSG00000081177	EXD2	Non-disease gene
					569	ENSG00000081307	UBA5	Non-disease gene
					570	ENSG00000081320	STK17B	Non-disease gene
					571	ENSG00000081377	CDC14B	Non-disease gene
					572	ENSG00000081692	JMJD4	Non-disease gene
					573	ENSG00000081760	AACS	Non-disease gene
					574	ENSG00000081791	KIAA0141	Non-disease gene
					575	ENSG00000081800	SLC13A1	Non-disease gene
					576	ENSG00000081803	CADPS2	Non-disease gene
					577	ENSG00000081853	PCDHGA2	Non-disease gene
					578	ENSG00000081870	HSPB11	Non-disease gene
					579	ENSG00000082014	SMARCD3	Non-disease gene
					580	ENSG00000082068	WDR70	Non-disease gene
					581	ENSG00000082146	STRADB	Non-disease gene
					582	ENSG00000082213	C5orf22	Non-disease gene
					583	ENSG00000082258	CCNT2	Non-disease gene
					584	ENSG00000082269	FAM135A	Non-disease gene
					585	ENSG00000082293	COL19A1	Non-disease gene
					586	ENSG00000082438	COBLL1	Non-disease gene
					587	ENSG00000082482	KCNK2	Non-disease gene
					588	ENSG00000082497	SERTAD4	Non-disease gene
					589	ENSG00000082515	MRPL22	Non-disease gene
					590	ENSG00000082516	GEMIN5	Non-disease gene
					591	ENSG00000082684	SEMA5B	Non-disease gene
					592	ENSG00000083223	ZCCHC6	Non-disease gene
					593	ENSG00000083290	ULK2	Non-disease gene
					594	ENSG00000083520	DIS3	Non-disease gene
					595	ENSG00000083544	TDRD3	Non-disease gene
					596	ENSG00000083750	RRAGB	Non-disease gene
					597	ENSG00000083782	EPYC	Non-disease gene
					598	ENSG00000083817	ZNF416	Non-disease gene
					599	ENSG00000083838	ZNF446	Non-disease gene
					600	ENSG00000083842	ZNF8	Non-disease gene
					601	ENSG00000084072	PPIE	Non-disease gene
					602	ENSG00000084092	C4orf14	Non-disease gene
					603	ENSG00000084444	KIAA1467	Non-disease gene
					604	ENSG00000084463	WBP11	Non-disease gene
					605	ENSG00000084628	NKAIN1	Non-disease gene
					606	ENSG00000084636	COL16A1	Non-disease gene
					607	ENSG00000084652	TXLNA	Non-disease gene
					608	ENSG00000084693	AGBL5	Non-disease gene
					609	ENSG00000084710	EFR3B	Non-disease gene
					610	ENSG00000084731	KIF3C	Non-disease gene
					611	ENSG00000084733	RAB10	Non-disease gene
					612	ENSG00000084764	MAPRE3	Non-disease gene
					613	ENSG00000085274	MYNN	Non-disease gene
					614	ENSG00000085365	SCAMP1	Non-disease gene
					615	ENSG00000085433	WDR47	Non-disease gene
					616	ENSG00000085449	WDFY1	Non-disease gene
					617	ENSG00000085491	SLC25A24	Non-disease gene
					618	ENSG00000085552	IGSF9	Non-disease gene
					619	ENSG00000085760	MTIF2	Non-disease gene
					620	ENSG00000085831	TTC39A	Non-disease gene
					621	ENSG00000085982	USP40	Non-disease gene
					622	ENSG00000086015	MAST2	Non-disease gene
					623	ENSG00000086102	NFX1	Non-disease gene
					624	ENSG00000086159	AQP6	Non-disease gene
					625	ENSG00000086189	DIMT1L	Non-disease gene
					626	ENSG00000086200	IPO11	Non-disease gene
					627	ENSG00000086289	EPDR1	Non-disease gene
					628	ENSG00000086475	SEPHS1	Non-disease gene
					629	ENSG00000086619	ERO1LB	Non-disease gene
					630	ENSG00000086717	PPEF1	Non-disease gene
					631	ENSG00000086967	MYBPC2	Non-disease gene
					632	ENSG00000087008	ACOX3	Non-disease gene
					633	ENSG00000087077	TRIP6	Non-disease gene
					634	ENSG00000087095	NLK	Non-disease gene
					635	ENSG00000087111	PIGS	Non-disease gene
					636	ENSG00000087128	TMPRSS11E	Non-disease gene
					637	ENSG00000087152	ATXN7L3	Non-disease gene
					638	ENSG00000087157	PGS1	Non-disease gene
					639	ENSG00000087253	LPCAT2	Non-disease gene
					640	ENSG00000087263	OGFOD1	Non-disease gene
					641	ENSG00000087303	NID2	Non-disease gene
					642	ENSG00000087365	SF3B2	Non-disease gene
					643	ENSG00000087448	KLHDC5	Non-disease gene
					644	ENSG00000087495	PHACTR3	Non-disease gene
					645	ENSG00000087589	CASS4	Non-disease gene
					646	ENSG00000087842	PIR	Non-disease gene
					647	ENSG00000087884	C11orf67	Non-disease gene
					648	ENSG00000088179	PTPN4	Non-disease gene
					649	ENSG00000088280	ASAP3	Non-disease gene
					650	ENSG00000088298	EDEM2	Non-disease gene
					651	ENSG00000088320	REM1	Non-disease gene
					652	ENSG00000088356	PDRG1	Non-disease gene
					653	ENSG00000088451	TGDS	Non-disease gene
					654	ENSG00000088543	C3orf18	Non-disease gene
					655	ENSG00000088726	TMEM40	Non-disease gene
					656	ENSG00000088727	KIF9	Non-disease gene
					657	ENSG00000088756	ARHGAP28	Non-disease gene
					658	ENSG00000088808	PPP1R13B	Non-disease gene
					659	ENSG00000088812	ATRN	Non-disease gene
					660	ENSG00000088854	C20orf194	Non-disease gene
					661	ENSG00000088881	EBF4	Non-disease gene
					662	ENSG00000088882	CPXM1	Non-disease gene
					663	ENSG00000088899	RP5-1187M17.10	Non-disease gene
					664	ENSG00000088930	XRN2	Non-disease gene
					665	ENSG00000089006	SNX5	Non-disease gene
					666	ENSG00000089022	MAPKAPK5	Non-disease gene
					667	ENSG00000089050	RBBP9	Non-disease gene
					668	ENSG00000089057	SLC23A2	Non-disease gene
					669	ENSG00000089060	SLC24A6	Non-disease gene
					670	ENSG00000089063	C20orf30	Non-disease gene
					671	ENSG00000089091	C20orf12	Non-disease gene
					672	ENSG00000089094	KDM2B	Non-disease gene
					673	ENSG00000089101	C20orf26	Non-disease gene
					674	ENSG00000089116	LHX5	Non-disease gene
					675	ENSG00000089123	TASP1	Non-disease gene
					676	ENSG00000089163	SIRT4	Non-disease gene
					677	ENSG00000089177	KIF16B	Non-disease gene
					678	ENSG00000089195	TRMT6	Non-disease gene
					679	ENSG00000089486	C16orf5	Non-disease gene
					680	ENSG00000089505	CMTM1	Non-disease gene
					681	ENSG00000089558	KCNH4	Non-disease gene
					682	ENSG00000089597	GANAB	Non-disease gene
					683	ENSG00000089639	GMIP	Non-disease gene
					684	ENSG00000089682	RBM41	Non-disease gene
					685	ENSG00000089723	OTUB2	Non-disease gene
					686	ENSG00000089775	ZBTB25	Non-disease gene
					687	ENSG00000089818	NECAP1	Non-disease gene
					688	ENSG00000089847	ANKRD24	Non-disease gene
					689	ENSG00000089916	C14orf118	Non-disease gene
					690	ENSG00000090013	BLVRB	Non-disease gene
					691	ENSG00000090097	PCBP4	Non-disease gene
					692	ENSG00000090238	YPEL3	Non-disease gene
					693	ENSG00000090263	MRPS33	Non-disease gene
					694	ENSG00000090372	STRN4	Non-disease gene
					695	ENSG00000090432	MUL1	Non-disease gene
					696	ENSG00000090447	TFAP4	Non-disease gene
					697	ENSG00000090470	PDCD7	Non-disease gene
					698	ENSG00000090512	FETUB	Non-disease gene
					699	ENSG00000090520	DNAJB11	Non-disease gene
					700	ENSG00000090530	LEPREL1	Non-disease gene
					701	ENSG00000090539	CHRD	Non-disease gene
					702	ENSG00000090565	RAB11FIP3	Non-disease gene
					703	ENSG00000090661	LASS4	Non-disease gene
					704	ENSG00000090686	USP48	Non-disease gene
					705	ENSG00000090905	TNRC6A	Non-disease gene
					706	ENSG00000090924	PLEKHG2	Non-disease gene
					707	ENSG00000090971	NAT14	Non-disease gene
					708	ENSG00000090975	PITPNM2	Non-disease gene
					709	ENSG00000091009	RBM27	Non-disease gene
					710	ENSG00000091073	DTX2	Non-disease gene
					711	ENSG00000091106	NLRC4	Non-disease gene
					712	ENSG00000091127	PUS7	Non-disease gene
					713	ENSG00000091129	NRCAM	Non-disease gene
					714	ENSG00000091428	RAPGEF4	Non-disease gene
					715	ENSG00000091436	AC013461.1	Non-disease gene
					716	ENSG00000091490	SEL1L3	Non-disease gene
					717	ENSG00000091527	CDV3	Non-disease gene
					718	ENSG00000091542	ALKBH5	Non-disease gene
					719	ENSG00000091664	SLC17A6	Non-disease gene
					720	ENSG00000091732	ZC3HC1	Non-disease gene
					721	ENSG00000091844	RGS17	Non-disease gene
					722	ENSG00000091947	TMEM101	Non-disease gene
					723	ENSG00000091986	CCDC80	Non-disease gene
					724	ENSG00000092020	PPP2R3C	Non-disease gene
					725	ENSG00000092036	HAUS4	Non-disease gene
					726	ENSG00000092051	JPH4	Non-disease gene
					727	ENSG00000092094	OSGEP	Non-disease gene
					728	ENSG00000092096	SLC22A17	Non-disease gene
					729	ENSG00000092098	RNF31	Non-disease gene
					730	ENSG00000092140	G2E3	Non-disease gene
					731	ENSG00000092203	TOX4	Non-disease gene
					732	ENSG00000092470	WDR76	Non-disease gene
					733	ENSG00000092531	SNAP23	Non-disease gene
					734	ENSG00000092853	CLSPN	Non-disease gene
					735	ENSG00000092871	RFFL	Non-disease gene
					736	ENSG00000092931	MFSD11	Non-disease gene
					737	ENSG00000092978	GPATCH2	Non-disease gene
					738	ENSG00000093144	ECHDC1	Non-disease gene
					739	ENSG00000093167	LRRFIP2	Non-disease gene
					740	ENSG00000093183	SEC22C	Non-disease gene
					741	ENSG00000093217	XYLB	Non-disease gene
					742	ENSG00000094661	OR1I1	Non-disease gene
					743	ENSG00000094841	UPRT	Non-disease gene
					744	ENSG00000094975	C1orf9	Non-disease gene
					745	ENSG00000095059	DHPS	Non-disease gene
					746	ENSG00000095066	HOOK2	Non-disease gene
					747	ENSG00000095203	EPB41L4B	Non-disease gene
					748	ENSG00000095209	TMEM38B	Non-disease gene
					749	ENSG00000095261	PSMD5	Non-disease gene
					750	ENSG00000095370	SH2D3C	Non-disease gene
					751	ENSG00000095383	TBC1D2	Non-disease gene
					752	ENSG00000095485	CWF19L1	Non-disease gene
					753	ENSG00000095574	IKZF5	Non-disease gene
					754	ENSG00000095587	TLL2	Non-disease gene
					755	ENSG00000095627	TDRD1	Non-disease gene
					756	ENSG00000095713	CRTAC1	Non-disease gene
					757	ENSG00000095739	BAMBI	Non-disease gene
					758	ENSG00000095906	NUBP2	Non-disease gene
					759	ENSG00000095932	C19orf77	Non-disease gene
					760	ENSG00000095981	KCNK16	Non-disease gene
					761	ENSG00000096070	BRPF3	Non-disease gene
					762	ENSG00000096080	MRPS18A	Non-disease gene
					763	ENSG00000096654	ZNF184	Non-disease gene
					764	ENSG00000096872	IFT74	Non-disease gene
					765	ENSG00000097046	CDC7	Non-disease gene
					766	ENSG00000097096	SYDE2	Non-disease gene
					767	ENSG00000099203	TMED1	Non-disease gene
					768	ENSG00000099219	ERMP1	Non-disease gene
					769	ENSG00000099260	PALMD	Non-disease gene
					770	ENSG00000099282	TSPAN15	Non-disease gene
					771	ENSG00000099308	MAST3	Non-disease gene
					772	ENSG00000099330	OCEL1	Non-disease gene
					773	ENSG00000099364	FBXL19	Non-disease gene
					774	ENSG00000099381	SETD1A	Non-disease gene
					775	ENSG00000099385	BCL7C	Non-disease gene
					776	ENSG00000099617	EFNA2	Non-disease gene
					777	ENSG00000099624	ATP5D	Non-disease gene
					778	ENSG00000099804	CDC34	Non-disease gene
					779	ENSG00000099812	C19orf21	Non-disease gene
					780	ENSG00000099814	KIAA0284	Non-disease gene
					781	ENSG00000099834	CDHR5	Non-disease gene
					782	ENSG00000099840	C19orf36	Non-disease gene
					783	ENSG00000099864	PALM	Non-disease gene
					784	ENSG00000099910	KLHL22	Non-disease gene
					785	ENSG00000099917	MED15	Non-disease gene
					786	ENSG00000099949	LZTR1	Non-disease gene
					787	ENSG00000099954	CECR2	Non-disease gene
					788	ENSG00000099957	P2RX6	Non-disease gene
					789	ENSG00000099958	DERL3	Non-disease gene
					790	ENSG00000099960	SLC7A4	Non-disease gene
					791	ENSG00000099994	SUSD2	Non-disease gene
					792	ENSG00000099999	RNF215	Non-disease gene
					793	ENSG00000100003	SEC14L2	Non-disease gene
					794	ENSG00000100012	SEC14L3	Non-disease gene
					795	ENSG00000100023	PPIL2	Non-disease gene
					796	ENSG00000100027	YPEL1	Non-disease gene
					797	ENSG00000100029	PES1	Non-disease gene
					798	ENSG00000100034	PPM1F	Non-disease gene
					799	ENSG00000100036	SLC35E4	Non-disease gene
					800	ENSG00000100038	TOP3B	Non-disease gene
					801	ENSG00000100055	CYTH4	Non-disease gene
					802	ENSG00000100065	CARD10	Non-disease gene
					803	ENSG00000100092	SH3BP1	Non-disease gene
					804	ENSG00000100100	PIK3IP1	Non-disease gene
					805	ENSG00000100101	NOL12	Non-disease gene
					806	ENSG00000100104	SRRD	Non-disease gene
					807	ENSG00000100105	PATZ1	Non-disease gene
					808	ENSG00000100109	TFIP11	Non-disease gene
					809	ENSG00000100124	ANKRD54	Non-disease gene
					810	ENSG00000100139	MICALL1	Non-disease gene
					811	ENSG00000100142	POLR2F	Non-disease gene
					812	ENSG00000100147	CCDC134	Non-disease gene
					813	ENSG00000100151	PICK1	Non-disease gene
					814	ENSG00000100156	SLC16A8	Non-disease gene
					815	ENSG00000100162	CENPM	Non-disease gene
					816	ENSG00000100191	SLC5A4	Non-disease gene
					817	ENSG00000100196	KDELR3	Non-disease gene
					818	ENSG00000100209	HSCB	Non-disease gene
					819	ENSG00000100211	CBY1	Non-disease gene
					820	ENSG00000100216	TOMM22	Non-disease gene
					821	ENSG00000100218	RTDR1	Non-disease gene
					822	ENSG00000100221	JOSD1	Non-disease gene
					823	ENSG00000100226	GTPBP1	Non-disease gene
					824	ENSG00000100239	SAPS2	Non-disease gene
					825	ENSG00000100246	DNAL4	Non-disease gene
					826	ENSG00000100253	MIOX	Non-disease gene
					827	ENSG00000100271	TTLL1	Non-disease gene
					828	ENSG00000100294	MCAT	Non-disease gene
					829	ENSG00000100296	THOC5	Non-disease gene
					830	ENSG00000100302	RASD2	Non-disease gene
					831	ENSG00000100307	CBX7	Non-disease gene
					832	ENSG00000100314	CABP7	Non-disease gene
					833	ENSG00000100319	ZMAT5	Non-disease gene
					834	ENSG00000100320	RBM9	Non-disease gene
					835	ENSG00000100324	TAB1	Non-disease gene
					836	ENSG00000100325	ASCC2	Non-disease gene
					837	ENSG00000100330	MTMR3	Non-disease gene
					838	ENSG00000100341	PNPLA5	Non-disease gene
					839	ENSG00000100350	FOXRED2	Non-disease gene
					840	ENSG00000100351	GRAP2	Non-disease gene
					841	ENSG00000100359	SGSM3	Non-disease gene
					842	ENSG00000100360	RABL4	Non-disease gene
					843	ENSG00000100372	SLC25A17	Non-disease gene
					844	ENSG00000100376	FAM118A	Non-disease gene
					845	ENSG00000100379	KCTD17	Non-disease gene
					846	ENSG00000100395	L3MBTL2	Non-disease gene
					847	ENSG00000100401	RANGAP1	Non-disease gene
					848	ENSG00000100403	ZC3H7B	Non-disease gene
					849	ENSG00000100410	PHF5A	Non-disease gene
					850	ENSG00000100413	POLR3H	Non-disease gene
					851	ENSG00000100417	PMM1	Non-disease gene
					852	ENSG00000100418	PPPDE2	Non-disease gene
					853	ENSG00000100422	CERK	Non-disease gene
					854	ENSG00000100426	ZBED4	Non-disease gene
					855	ENSG00000100433	KCNK10	Non-disease gene
					856	ENSG00000100439	ABHD4	Non-disease gene
					857	ENSG00000100441	KHNYN	Non-disease gene
					858	ENSG00000100483	C14orf138	Non-disease gene
					859	ENSG00000100505	TRIM9	Non-disease gene
					860	ENSG00000100522	GNPNAT1	Non-disease gene
					861	ENSG00000100523	DDHD1	Non-disease gene
					862	ENSG00000100557	C14orf105	Non-disease gene
					863	ENSG00000100558	PLEK2	Non-disease gene
					864	ENSG00000100564	PIGH	Non-disease gene
					865	ENSG00000100565	C14orf166B	Non-disease gene
					866	ENSG00000100578	KIAA0586	Non-disease gene
					867	ENSG00000100592	DAAM1	Non-disease gene
					868	ENSG00000100593	ISM2	Non-disease gene
					869	ENSG00000100599	RIN3	Non-disease gene
					870	ENSG00000100600	LGMN	Non-disease gene
					871	ENSG00000100601	ALKBH1	Non-disease gene
					872	ENSG00000100605	ITPK1	Non-disease gene
					873	ENSG00000100614	PPM1A	Non-disease gene
					874	ENSG00000100626	GALNTL1	Non-disease gene
					875	ENSG00000100628	ASB2	Non-disease gene
					876	ENSG00000100629	C14orf145	Non-disease gene
					877	ENSG00000100650	SRSF5	Non-disease gene
					878	ENSG00000100678	SLC8A3	Non-disease gene
					879	ENSG00000100711	ZFYVE21	Non-disease gene
					880	ENSG00000100726	TELO2	Non-disease gene
					881	ENSG00000100744	C14orf129	Non-disease gene
					882	ENSG00000100767	PAPLN	Non-disease gene
					883	ENSG00000100796	SMEK1	Non-disease gene
					884	ENSG00000100802	C14orf93	Non-disease gene
					885	ENSG00000100813	ACIN1	Non-disease gene
					886	ENSG00000100842	EFS	Non-disease gene
					887	ENSG00000100852	ARHGAP5	Non-disease gene
					888	ENSG00000100865	CINP	Non-disease gene
					889	ENSG00000100867	DHRS2	Non-disease gene
					890	ENSG00000100884	CPNE6	Non-disease gene
					891	ENSG00000100897	DCAF11	Non-disease gene
					892	ENSG00000100908	FAM158A	Non-disease gene
					893	ENSG00000100916	BRMS1L	Non-disease gene
					894	ENSG00000100918	REC8	Non-disease gene
					895	ENSG00000100982	PCIF1	Non-disease gene
					896	ENSG00000100991	TRPC4AP	Non-disease gene
					897	ENSG00000100994	PYGB	Non-disease gene
					898	ENSG00000101003	GINS1	Non-disease gene
					899	ENSG00000101004	NINL	Non-disease gene
					900	ENSG00000101049	SGK2	Non-disease gene
					901	ENSG00000101052	IFT52	Non-disease gene
					902	ENSG00000101074	R3HDML	Non-disease gene
					903	ENSG00000101079	NDRG3	Non-disease gene
					904	ENSG00000101082	SLA2	Non-disease gene
					905	ENSG00000101096	NFATC2	Non-disease gene
					906	ENSG00000101098	RIMS4	Non-disease gene
					907	ENSG00000101104	PABPC1L	Non-disease gene
					908	ENSG00000101132	PFDN4	Non-disease gene
					909	ENSG00000101134	DOK5	Non-disease gene
					910	ENSG00000101138	CSTF1	Non-disease gene
					911	ENSG00000101150	TPD52L2	Non-disease gene
					912	ENSG00000101166	SLMO2	Non-disease gene
					913	ENSG00000101181	GTPBP5	Non-disease gene
					914	ENSG00000101182	PSMA7	Non-disease gene
					915	ENSG00000101189	C20orf20	Non-disease gene
					916	ENSG00000101193	C20orf11	Non-disease gene
					917	ENSG00000101194	SLC17A9	Non-disease gene
					918	ENSG00000101198	NKAIN4	Non-disease gene
					919	ENSG00000101203	COL20A1	Non-disease gene
					920	ENSG00000101216	GMEB2	Non-disease gene
					921	ENSG00000101222	SPEF1	Non-disease gene
					922	ENSG00000101230	C20orf82	Non-disease gene
					923	ENSG00000101236	RNF24	Non-disease gene
					924	ENSG00000101246	ARFRP1	Non-disease gene
					925	ENSG00000101251	SEL1L2	Non-disease gene
					926	ENSG00000101255	TRIB3	Non-disease gene
					927	ENSG00000101290	CDS2	Non-disease gene
					928	ENSG00000101294	HM13	Non-disease gene
					929	ENSG00000101298	SNPH	Non-disease gene
					930	ENSG00000101321	XKR7	Non-disease gene
					931	ENSG00000101323	HAO1	Non-disease gene
					932	ENSG00000101331	C20orf160	Non-disease gene
					933	ENSG00000101342	C20orf118	Non-disease gene
					934	ENSG00000101343	CRNKL1	Non-disease gene
					935	ENSG00000101349	PAK7	Non-disease gene
					936	ENSG00000101391	CDK5RAP1	Non-disease gene
					937	ENSG00000101413	RPRD1B	Non-disease gene
					938	ENSG00000101417	PXMP4	Non-disease gene
					939	ENSG00000101438	SLC32A1	Non-disease gene
					940	ENSG00000101442	ACTR5	Non-disease gene
					941	ENSG00000101445	PPP1R16B	Non-disease gene
					942	ENSG00000101447	FAM83D	Non-disease gene
					943	ENSG00000101452	DHX35	Non-disease gene
					944	ENSG00000101457	DNTTIP1	Non-disease gene
					945	ENSG00000101460	MAP1LC3A	Non-disease gene
					946	ENSG00000101463	TMEM90B	Non-disease gene
					947	ENSG00000101470	TNNC2	Non-disease gene
					948	ENSG00000101473	ACOT8	Non-disease gene
					949	ENSG00000101489	CELF4	Non-disease gene
					950	ENSG00000101493	ZNF516	Non-disease gene
					951	ENSG00000101542	CDH20	Non-disease gene
					952	ENSG00000101544	ADNP2	Non-disease gene
					953	ENSG00000101546	C18orf22	Non-disease gene
					954	ENSG00000101574	METTL4	Non-disease gene
					955	ENSG00000101608	MYL12A	Non-disease gene
					956	ENSG00000101624	CEP76	Non-disease gene
					957	ENSG00000101638	ST8SIA5	Non-disease gene
					958	ENSG00000101654	RNMT	Non-disease gene
					959	ENSG00000101695	RNF125	Non-disease gene
					960	ENSG00000101746	NOL4	Non-disease gene
					961	ENSG00000101751	POLI	Non-disease gene
					962	ENSG00000101752	MIB1	Non-disease gene
					963	ENSG00000101811	CSTF2	Non-disease gene
					964	ENSG00000101842	VSIG1	Non-disease gene
					965	ENSG00000101882	NKAP	Non-disease gene
					966	ENSG00000101888	NXT2	Non-disease gene
					967	ENSG00000101890	GUCY2F	Non-disease gene
					968	ENSG00000101901	ALG13	Non-disease gene
					969	ENSG00000101911	PRPS2	Non-disease gene
					970	ENSG00000101958	GLRA2	Non-disease gene
					971	ENSG00000101977	MCF2	Non-disease gene
					972	ENSG00000102024	PLS3	Non-disease gene
					973	ENSG00000102030	NAA10	Non-disease gene
					974	ENSG00000102032	RENBP	Non-disease gene
					975	ENSG00000102038	SMARCA1	Non-disease gene
					976	ENSG00000102053	ZC3H12B	Non-disease gene
					977	ENSG00000102057	KCND1	Non-disease gene
					978	ENSG00000102078	SLC25A14	Non-disease gene
					979	ENSG00000102096	PIM2	Non-disease gene
					980	ENSG00000102098	SCML2	Non-disease gene
					981	ENSG00000102100	SLC35A2	Non-disease gene
					982	ENSG00000102109	PCSK1N	Non-disease gene
					983	ENSG00000102178	UBL4A	Non-disease gene
					984	ENSG00000102181	CD99L2	Non-disease gene
					985	ENSG00000102189	EEA1	Non-disease gene
					986	ENSG00000102221	PHF16	Non-disease gene
					987	ENSG00000102225	CDK16	Non-disease gene
					988	ENSG00000102230	PCYT1B	Non-disease gene
					989	ENSG00000102241	HTATSF1	Non-disease gene
					990	ENSG00000102243	VGLL1	Non-disease gene
					991	ENSG00000102287	GABRE	Non-disease gene
					992	ENSG00000102362	SYTL4	Non-disease gene
					993	ENSG00000102384	CENPI	Non-disease gene
					994	ENSG00000102390	CXorf26	Non-disease gene
					995	ENSG00000102445	C13orf18	Non-disease gene
					996	ENSG00000102452	NALCN	Non-disease gene
					997	ENSG00000102471	NDFIP2	Non-disease gene
					998	ENSG00000102531	FNDC3A	Non-disease gene
					999	ENSG00000102543	CDADC1	Non-disease gene
					1000	ENSG00000102547	CAB39L	Non-disease gene
					1001	ENSG00000102580	DNAJC3	Non-disease gene
					1002	ENSG00000102595	UGGT2	Non-disease gene
					1003	ENSG00000102699	PARP4	Non-disease gene
					1004	ENSG00000102710	FAM48A	Non-disease gene
					1005	ENSG00000102738	MRPS31	Non-disease gene
					1006	ENSG00000102780	DGKH	Non-disease gene
					1007	ENSG00000102781	KATNAL1	Non-disease gene
					1008	ENSG00000102794	IRG1	Non-disease gene
					1009	ENSG00000102802	C13orf33	Non-disease gene
					1010	ENSG00000102837	OLFM4	Non-disease gene
					1011	ENSG00000102870	ZNF629	Non-disease gene
					1012	ENSG00000102886	GDPD3	Non-disease gene
					1013	ENSG00000102890	ELMO3	Non-disease gene
					1014	ENSG00000102900	NUP93	Non-disease gene
					1015	ENSG00000102901	CENPT	Non-disease gene
					1016	ENSG00000102904	TSNAXIP1	Non-disease gene
					1017	ENSG00000102910	LONP2	Non-disease gene
					1018	ENSG00000102924	CBLN1	Non-disease gene
					1019	ENSG00000102931	ARL2BP	Non-disease gene
					1020	ENSG00000102935	ZNF423	Non-disease gene
					1021	ENSG00000102984	ZNF821	Non-disease gene
					1022	ENSG00000103018	CYB5B	Non-disease gene
					1023	ENSG00000103021	CCDC113	Non-disease gene
					1024	ENSG00000103023	PRSS54	Non-disease gene
					1025	ENSG00000103024	NME3	Non-disease gene
					1026	ENSG00000103034	NDRG4	Non-disease gene
					1027	ENSG00000103037	SETD6	Non-disease gene
					1028	ENSG00000103042	SLC38A7	Non-disease gene
					1029	ENSG00000103047	TMCO7	Non-disease gene
					1030	ENSG00000103061	SLC7A6OS	Non-disease gene
					1031	ENSG00000103066	PLA2G15	Non-disease gene
					1032	ENSG00000103067	ESRP2	Non-disease gene
					1033	ENSG00000103091	WDR59	Non-disease gene
					1034	ENSG00000103111	MON1B	Non-disease gene
					1035	ENSG00000103145	HCFC1R1	Non-disease gene
					1036	ENSG00000103148	C16orf35	Non-disease gene
					1037	ENSG00000103154	NECAB2	Non-disease gene
					1038	ENSG00000103160	HSDL1	Non-disease gene
					1039	ENSG00000103194	USP10	Non-disease gene
					1040	ENSG00000103196	CRISPLD2	Non-disease gene
					1041	ENSG00000103202	NME4	Non-disease gene
					1042	ENSG00000103245	NARFL	Non-disease gene
					1043	ENSG00000103248	MTHFSD	Non-disease gene
					1044	ENSG00000103253	HAGHL	Non-disease gene
					1045	ENSG00000103254	FAM173A	Non-disease gene
					1046	ENSG00000103260	METRN	Non-disease gene
					1047	ENSG00000103264	FBXO31	Non-disease gene
					1048	ENSG00000103269	RHBDL1	Non-disease gene
					1049	ENSG00000103274	NUBP1	Non-disease gene
					1050	ENSG00000103310	ZP2	Non-disease gene
					1051	ENSG00000103326	SOLH	Non-disease gene
					1052	ENSG00000103343	ZNF174	Non-disease gene
					1053	ENSG00000103351	CLUAP1	Non-disease gene
					1054	ENSG00000103365	GGA2	Non-disease gene
					1055	ENSG00000103381	CPPED1	Non-disease gene
					1056	ENSG00000103426	CORO7	Non-disease gene
					1057	ENSG00000103429	BFAR	Non-disease gene
					1058	ENSG00000103485	QPRT	Non-disease gene
					1059	ENSG00000103496	STX4	Non-disease gene
					1060	ENSG00000103507	BCKDK	Non-disease gene
					1061	ENSG00000103510	MYST1	Non-disease gene
					1062	ENSG00000103528	SYT17	Non-disease gene
					1063	ENSG00000103534	TMC5	Non-disease gene
					1064	ENSG00000103540	AC012621.2	Non-disease gene
					1065	ENSG00000103544	C16orf62	Non-disease gene
					1066	ENSG00000103549	RNF40	Non-disease gene
					1067	ENSG00000103550	C16orf88	Non-disease gene
					1068	ENSG00000103591	AAGAB	Non-disease gene
					1069	ENSG00000103599	IQCH	Non-disease gene
					1070	ENSG00000103647	CORO2B	Non-disease gene
					1071	ENSG00000103710	RASL12	Non-disease gene
					1072	ENSG00000103852	TTC23	Non-disease gene
					1073	ENSG00000103855	CD276	Non-disease gene
					1074	ENSG00000103932	RPAP1	Non-disease gene
					1075	ENSG00000103966	EHD4	Non-disease gene
					1076	ENSG00000104043	ATP8B4	Non-disease gene
					1077	ENSG00000104047	DTWD1	Non-disease gene
					1078	ENSG00000104059	FAM189A1	Non-disease gene
					1079	ENSG00000104064	GABPB1	Non-disease gene
					1080	ENSG00000104129	DNAJC17	Non-disease gene
					1081	ENSG00000104140	RHOV	Non-disease gene
					1082	ENSG00000104142	VPS18	Non-disease gene
					1083	ENSG00000104147	OIP5	Non-disease gene
					1084	ENSG00000104205	SGK3	Non-disease gene
					1085	ENSG00000104218	CSPP1	Non-disease gene
					1086	ENSG00000104219	ZDHHC2	Non-disease gene
					1087	ENSG00000104228	TRIM35	Non-disease gene
					1088	ENSG00000104231	ZFAND1	Non-disease gene
					1089	ENSG00000104299	INTS9	Non-disease gene
					1090	ENSG00000104324	PGCP	Non-disease gene
					1091	ENSG00000104331	IMPAD1	Non-disease gene
					1092	ENSG00000104341	LAPTM4B	Non-disease gene
					1093	ENSG00000104343	UBE2W	Non-disease gene
					1094	ENSG00000104361	NIPAL2	Non-disease gene
					1095	ENSG00000104369	JPH1	Non-disease gene
					1096	ENSG00000104371	DKK4	Non-disease gene
					1097	ENSG00000104413	ESRP1	Non-disease gene
					1098	ENSG00000104427	FAM164A	Non-disease gene
					1099	ENSG00000104442	ARMC1	Non-disease gene
					1100	ENSG00000104450	SPAG1	Non-disease gene
					1101	ENSG00000104472	CHRAC1	Non-disease gene
					1102	ENSG00000104497	SNX16	Non-disease gene
					1103	ENSG00000104518	GSDMD	Non-disease gene
					1104	ENSG00000104522	TSTA3	Non-disease gene
					1105	ENSG00000104537	ANXA13	Non-disease gene
					1106	ENSG00000104549	SQLE	Non-disease gene
					1107	ENSG00000104611	SH2D4A	Non-disease gene
					1108	ENSG00000104613	INTS10	Non-disease gene
					1109	ENSG00000104626	ERI1	Non-disease gene
					1110	ENSG00000104635	SLC39A14	Non-disease gene
					1111	ENSG00000104679	R3HCC1	Non-disease gene
					1112	ENSG00000104691	UBXN8	Non-disease gene
					1113	ENSG00000104714	ERICH1	Non-disease gene
					1114	ENSG00000104731	KLHDC4	Non-disease gene
					1115	ENSG00000104738	MCM4	Non-disease gene
					1116	ENSG00000104756	KCTD9	Non-disease gene
					1117	ENSG00000104760	FGL1	Non-disease gene
					1118	ENSG00000104804	TULP2	Non-disease gene
					1119	ENSG00000104805	NUCB1	Non-disease gene
					1120	ENSG00000104808	DHDH	Non-disease gene
					1121	ENSG00000104814	MAP4K1	Non-disease gene
					1122	ENSG00000104825	NFKBIB	Non-disease gene
					1123	ENSG00000104856	RELB	Non-disease gene
					1124	ENSG00000104859	SFRS16	Non-disease gene
					1125	ENSG00000104863	LIN7B	Non-disease gene
					1126	ENSG00000104866	LRRC68	Non-disease gene
					1127	ENSG00000104880	ARHGEF18	Non-disease gene
					1128	ENSG00000104883	PEX11G	Non-disease gene
					1129	ENSG00000104885	DOT1L	Non-disease gene
					1130	ENSG00000104892	KLC3	Non-disease gene
					1131	ENSG00000104897	SF3A2	Non-disease gene
					1132	ENSG00000104901	DKKL1	Non-disease gene
					1133	ENSG00000104946	TBC1D17	Non-disease gene
					1134	ENSG00000104951	IL4I1	Non-disease gene
					1135	ENSG00000104957	CCDC130	Non-disease gene
					1136	ENSG00000104969	SGTA	Non-disease gene
					1137	ENSG00000104976	SNAPC2	Non-disease gene
					1138	ENSG00000104983	CCDC61	Non-disease gene
					1139	ENSG00000105011	ASF1B	Non-disease gene
					1140	ENSG00000105053	VRK3	Non-disease gene
					1141	ENSG00000105063	PPP6R1	Non-disease gene
					1142	ENSG00000105072	C19orf44	Non-disease gene
					1143	ENSG00000105085	MED26	Non-disease gene
					1144	ENSG00000105122	RASAL3	Non-disease gene
					1145	ENSG00000105127	AKAP8	Non-disease gene
					1146	ENSG00000105131	EPHX3	Non-disease gene
					1147	ENSG00000105135	ILVBL	Non-disease gene
					1148	ENSG00000105137	SYDE1	Non-disease gene
					1149	ENSG00000105197	TIMM50	Non-disease gene
					1150	ENSG00000105204	DYRK1B	Non-disease gene
					1151	ENSG00000105223	PLD3	Non-disease gene
					1152	ENSG00000105245	NUMBL	Non-disease gene
					1153	ENSG00000105248	CCDC94	Non-disease gene
					1154	ENSG00000105251	SHD	Non-disease gene
					1155	ENSG00000105255	FSD1	Non-disease gene
					1156	ENSG00000105261	AD001527.1	Non-disease gene
					1157	ENSG00000105270	CLIP3	Non-disease gene
					1158	ENSG00000105278	ZFR2	Non-disease gene
					1159	ENSG00000105289	TJP3	Non-disease gene
					1160	ENSG00000105298	C19orf29	Non-disease gene
					1161	ENSG00000105321	CCDC9	Non-disease gene
					1162	ENSG00000105323	HNRNPUL1	Non-disease gene
					1163	ENSG00000105325	FZR1	Non-disease gene
					1164	ENSG00000105339	DENND3	Non-disease gene
					1165	ENSG00000105364	MRPL4	Non-disease gene
					1166	ENSG00000105393	C19orf62	Non-disease gene
					1167	ENSG00000105419	MEIS3	Non-disease gene
					1168	ENSG00000105426	PTPRS	Non-disease gene
					1169	ENSG00000105427	CNFN	Non-disease gene
					1170	ENSG00000105438	KDELR1	Non-disease gene
					1171	ENSG00000105443	CYTH2	Non-disease gene
					1172	ENSG00000105447	GRWD1	Non-disease gene
					1173	ENSG00000105467	SYNGR4	Non-disease gene
					1174	ENSG00000105479	CCDC114	Non-disease gene
					1175	ENSG00000105507	CABP5	Non-disease gene
					1176	ENSG00000105518	TMEM205	Non-disease gene
					1177	ENSG00000105520	AC024575.2	Non-disease gene
					1178	ENSG00000105538	RASIP1	Non-disease gene
					1179	ENSG00000105549	THEG	Non-disease gene
					1180	ENSG00000105556	MIER2	Non-disease gene
					1181	ENSG00000105559	PLEKHA4	Non-disease gene
					1182	ENSG00000105576	TNPO2	Non-disease gene
					1183	ENSG00000105605	CACNG7	Non-disease gene
					1184	ENSG00000105613	MAST1	Non-disease gene
					1185	ENSG00000105617	LENG1	Non-disease gene
					1186	ENSG00000105619	TFPT	Non-disease gene
					1187	ENSG00000105643	ARRDC2	Non-disease gene
					1188	ENSG00000105669	COPE	Non-disease gene
					1189	ENSG00000105671	DDX49	Non-disease gene
					1190	ENSG00000105672	ETV2	Non-disease gene
					1191	ENSG00000105675	ATP4A	Non-disease gene
					1192	ENSG00000105676	ARMC6	Non-disease gene
					1193	ENSG00000105694	AC104537.1	Non-disease gene
					1194	ENSG00000105696	TMEM59L	Non-disease gene
					1195	ENSG00000105699	LSR	Non-disease gene
					1196	ENSG00000105705	SUGP1	Non-disease gene
					1197	ENSG00000105717	PBX4	Non-disease gene
					1198	ENSG00000105722	ERF	Non-disease gene
					1199	ENSG00000105726	ATP13A1	Non-disease gene
					1200	ENSG00000105732	ZNF574	Non-disease gene
					1201	ENSG00000105738	SIPA1L3	Non-disease gene
					1202	ENSG00000105767	CADM4	Non-disease gene
					1203	ENSG00000105771	C19orf61	Non-disease gene
					1204	ENSG00000105778	AVL9	Non-disease gene
					1205	ENSG00000105784	RUNDC3B	Non-disease gene
					1206	ENSG00000105793	GTPBP10	Non-disease gene
					1207	ENSG00000105819	PMPCB	Non-disease gene
					1208	ENSG00000105849	TWISTNB	Non-disease gene
					1209	ENSG00000105856	HBP1	Non-disease gene
					1210	ENSG00000105865	DUS4L	Non-disease gene
					1211	ENSG00000105875	WDR91	Non-disease gene
					1212	ENSG00000105879	CBLL1	Non-disease gene
					1213	ENSG00000105887	MTPN	Non-disease gene
					1214	ENSG00000105926	MPP6	Non-disease gene
					1215	ENSG00000105948	TTC26	Non-disease gene
					1216	ENSG00000105954	NPVF	Non-disease gene
					1217	ENSG00000105963	ADAP1	Non-disease gene
					1218	ENSG00000105967	TFEC	Non-disease gene
					1219	ENSG00000105982	RNF32	Non-disease gene
					1220	ENSG00000106012	IQCE	Non-disease gene
					1221	ENSG00000106013	ANKRD7	Non-disease gene
					1222	ENSG00000106034	C7orf58	Non-disease gene
					1223	ENSG00000106038	EVX1	Non-disease gene
					1224	ENSG00000106049	HIBADH	Non-disease gene
					1225	ENSG00000106066	CPVL	Non-disease gene
					1226	ENSG00000106078	COBL	Non-disease gene
					1227	ENSG00000106086	PLEKHA8	Non-disease gene
					1228	ENSG00000106113	CRHR2	Non-disease gene
					1229	ENSG00000106244	PDAP1	Non-disease gene
					1230	ENSG00000106261	ZKSCAN1	Non-disease gene
					1231	ENSG00000106266	SNX8	Non-disease gene
					1232	ENSG00000106290	TAF6	Non-disease gene
					1233	ENSG00000106302	HYAL4	Non-disease gene
					1234	ENSG00000106328	FSCN3	Non-disease gene
					1235	ENSG00000106330	MOSPD3	Non-disease gene
					1236	ENSG00000106336	FBXO24	Non-disease gene
					1237	ENSG00000106346	USP42	Non-disease gene
					1238	ENSG00000106351	AGFG2	Non-disease gene
					1239	ENSG00000106399	RPA3	Non-disease gene
					1240	ENSG00000106400	ZNHIT1	Non-disease gene
					1241	ENSG00000106404	CLDN15	Non-disease gene
					1242	ENSG00000106436	MYL10	Non-disease gene
					1243	ENSG00000106443	PHF14	Non-disease gene
					1244	ENSG00000106565	TMEM176B	Non-disease gene
					1245	ENSG00000106608	URGCP	Non-disease gene
					1246	ENSG00000106609	C7orf42	Non-disease gene
					1247	ENSG00000106628	POLD2	Non-disease gene
					1248	ENSG00000106686	C9orf68	Non-disease gene
					1249	ENSG00000106723	SPIN1	Non-disease gene
					1250	ENSG00000106771	C9orf5	Non-disease gene
					1251	ENSG00000106780	MEGF9	Non-disease gene
					1252	ENSG00000106785	TRIM14	Non-disease gene
					1253	ENSG00000106789	CORO2A	Non-disease gene
					1254	ENSG00000106809	OGN	Non-disease gene
					1255	ENSG00000106852	LHX6	Non-disease gene
					1256	ENSG00000106853	PTGR1	Non-disease gene
					1257	ENSG00000106868	SUSD1	Non-disease gene
					1258	ENSG00000106948	AKNA	Non-disease gene
					1259	ENSG00000106993	CDC37L1	Non-disease gene
					1260	ENSG00000107020	C9orf46	Non-disease gene
					1261	ENSG00000107021	TBC1D13	Non-disease gene
					1262	ENSG00000107036	KIAA1432	Non-disease gene
					1263	ENSG00000107140	TESK1	Non-disease gene
					1264	ENSG00000107147	KCNT1	Non-disease gene
					1265	ENSG00000107185	RGP1	Non-disease gene
					1266	ENSG00000107263	RAPGEF1	Non-disease gene
					1267	ENSG00000107281	NPDC1	Non-disease gene
					1268	ENSG00000107338	SHB	Non-disease gene
					1269	ENSG00000107341	UBE2R2	Non-disease gene
					1270	ENSG00000107362	FAM108B1	Non-disease gene
					1271	ENSG00000107443	CCNJ	Non-disease gene
					1272	ENSG00000107554	DNMBP	Non-disease gene
					1273	ENSG00000107560	RAB11FIP2	Non-disease gene
					1274	ENSG00000107566	ERLIN1	Non-disease gene
					1275	ENSG00000107614	TRDMT1	Non-disease gene
					1276	ENSG00000107651	SEC23IP	Non-disease gene
					1277	ENSG00000107669	ATE1	Non-disease gene
					1278	ENSG00000107672	NSMCE4A	Non-disease gene
					1279	ENSG00000107719	KIAA1274	Non-disease gene
					1280	ENSG00000107731	UNC5B	Non-disease gene
					1281	ENSG00000107738	C10orf54	Non-disease gene
					1282	ENSG00000107742	SPOCK2	Non-disease gene
					1283	ENSG00000107745	CBARA1	Non-disease gene
					1284	ENSG00000107771	FAM190	Non-disease gene
					1285	ENSG00000107816	LZTS2	Non-disease gene
					1286	ENSG00000107819	SFXN3	Non-disease gene
					1287	ENSG00000107821	KAZALD1	Non-disease gene
					1288	ENSG00000107833	NPM3	Non-disease gene
					1289	ENSG00000107863	ARHGAP21	Non-disease gene
					1290	ENSG00000107864	CPEB3	Non-disease gene
					1291	ENSG00000107872	FBXL15	Non-disease gene
					1292	ENSG00000107902	LHPP	Non-disease gene
					1293	ENSG00000107929	LARP4B	Non-disease gene
					1294	ENSG00000107938	C10orf137	Non-disease gene
					1295	ENSG00000107949	BCCIP	Non-disease gene
					1296	ENSG00000107959	PITRM1	Non-disease gene
					1297	ENSG00000107960	OBFC1	Non-disease gene
					1298	ENSG00000108001	EBF3	Non-disease gene
					1299	ENSG00000108039	XPNPEP1	Non-disease gene
					1300	ENSG00000108176	DNAJC12	Non-disease gene
					1301	ENSG00000108239	TBC1D12	Non-disease gene
					1302	ENSG00000108244	KRT23	Non-disease gene
					1303	ENSG00000108256	NUFIP2	Non-disease gene
					1304	ENSG00000108264	TADA2A	Non-disease gene
					1305	ENSG00000108270	AATF	Non-disease gene
					1306	ENSG00000108272	DHRS11	Non-disease gene
					1307	ENSG00000108292	MLLT6	Non-disease gene
					1308	ENSG00000108296	CWC25	Non-disease gene
					1309	ENSG00000108306	FBXL20	Non-disease gene
					1310	ENSG00000108309	RUNDC3A	Non-disease gene
					1311	ENSG00000108352	RAPGEFL1	Non-disease gene
					1312	ENSG00000108375	RNF43	Non-disease gene
					1313	ENSG00000108423	TUBD1	Non-disease gene
					1314	ENSG00000108469	RECQL5	Non-disease gene
					1315	ENSG00000108504	C17orf106	Non-disease gene
					1316	ENSG00000108506	INTS2	Non-disease gene
					1317	ENSG00000108523	RNF167	Non-disease gene
					1318	ENSG00000108528	SLC25A11	Non-disease gene
					1319	ENSG00000108551	RASD1	Non-disease gene
					1320	ENSG00000108590	MED31	Non-disease gene
					1321	ENSG00000108591	DRG2	Non-disease gene
					1322	ENSG00000108592	FTSJ3	Non-disease gene
					1323	ENSG00000108604	SMARCD2	Non-disease gene
					1324	ENSG00000108669	CYTH1	Non-disease gene
					1325	ENSG00000108759	KRT32	Non-disease gene
					1326	ENSG00000108771	DHX58	Non-disease gene
					1327	ENSG00000108773	KAT2A	Non-disease gene
					1328	ENSG00000108774	RAB5C	Non-disease gene
					1329	ENSG00000108798	ABI3	Non-disease gene
					1330	ENSG00000108825	AARSD1	Non-disease gene
					1331	ENSG00000108840	HDAC5	Non-disease gene
					1332	ENSG00000108852	MPP2	Non-disease gene
					1333	ENSG00000108861	DUSP3	Non-disease gene
					1334	ENSG00000108883	EFTUD2	Non-disease gene
					1335	ENSG00000108963	DPH1	Non-disease gene
					1336	ENSG00000109016	DHRS7B	Non-disease gene
					1337	ENSG00000109061	MYH1	Non-disease gene
					1338	ENSG00000109066	TMEM104	Non-disease gene
					1339	ENSG00000109072	VTN	Non-disease gene
					1340	ENSG00000109079	TNFAIP1	Non-disease gene
					1341	ENSG00000109083	IFT20	Non-disease gene
					1342	ENSG00000109084	TMEM97	Non-disease gene
					1343	ENSG00000109089	CDR2L	Non-disease gene
					1344	ENSG00000109103	UNC119	Non-disease gene
					1345	ENSG00000109111	SUPT6H	Non-disease gene
					1346	ENSG00000109113	RAB34	Non-disease gene
					1347	ENSG00000109118	PHF12	Non-disease gene
					1348	ENSG00000109133	TMEM33	Non-disease gene
					1349	ENSG00000109171	SLAIN2	Non-disease gene
					1350	ENSG00000109180	OCIAD1	Non-disease gene
					1351	ENSG00000109182	CWH43	Non-disease gene
					1352	ENSG00000109184	DCUN1D4	Non-disease gene
					1353	ENSG00000109205	ODAM	Non-disease gene
					1354	ENSG00000109265	KIAA1211	Non-disease gene
					1355	ENSG00000109436	TBC1D9	Non-disease gene
					1356	ENSG00000109445	ZNF330	Non-disease gene
					1357	ENSG00000109452	INPP4B	Non-disease gene
					1358	ENSG00000109466	KLHL2	Non-disease gene
					1359	ENSG00000109519	GRPEL1	Non-disease gene
					1360	ENSG00000109586	GALNT7	Non-disease gene
					1361	ENSG00000109654	TRIM2	Non-disease gene
					1362	ENSG00000109674	NEIL3	Non-disease gene
					1363	ENSG00000109680	TBC1D19	Non-disease gene
					1364	ENSG00000109686	SH3D19	Non-disease gene
					1365	ENSG00000109689	STIM2	Non-disease gene
					1366	ENSG00000109736	TETRAN	Non-disease gene
					1367	ENSG00000109756	RAPGEF2	Non-disease gene
					1368	ENSG00000109762	SNX25	Non-disease gene
					1369	ENSG00000109771	LRP2BP	Non-disease gene
					1370	ENSG00000109775	UFSP2	Non-disease gene
					1371	ENSG00000109787	KLF3	Non-disease gene
					1372	ENSG00000109790	KLHL5	Non-disease gene
					1373	ENSG00000109794	FAM149A	Non-disease gene
					1374	ENSG00000109805	NCAPG	Non-disease gene
					1375	ENSG00000109851	DBX1	Non-disease gene
					1376	ENSG00000109854	HTATIP2	Non-disease gene
					1377	ENSG00000109881	CCDC34	Non-disease gene
					1378	ENSG00000109943	CRTAM	Non-disease gene
					1379	ENSG00000109944	C11orf63	Non-disease gene
					1380	ENSG00000110011	DNAJC4	Non-disease gene
					1381	ENSG00000110031	LPXN	Non-disease gene
					1382	ENSG00000110042	DTX4	Non-disease gene
					1383	ENSG00000110060	PUS3	Non-disease gene
					1384	ENSG00000110063	DCPS	Non-disease gene
					1385	ENSG00000110075	PPP6R3	Non-disease gene
					1386	ENSG00000110076	NRXN2	Non-disease gene
					1387	ENSG00000110080	ST3GAL4	Non-disease gene
					1388	ENSG00000110104	CCDC86	Non-disease gene
					1389	ENSG00000110107	PRPF19	Non-disease gene
					1390	ENSG00000110108	TMEM109	Non-disease gene
					1391	ENSG00000110200	C11orf51	Non-disease gene
					1392	ENSG00000110218	PANX1	Non-disease gene
					1393	ENSG00000110274	CEP164	Non-disease gene
					1394	ENSG00000110315	RNF141	Non-disease gene
					1395	ENSG00000110422	HIPK3	Non-disease gene
					1396	ENSG00000110427	C11orf41	Non-disease gene
					1397	ENSG00000110429	FBXO3	Non-disease gene
					1398	ENSG00000110442	COMMD9	Non-disease gene
					1399	ENSG00000110446	SLC15A3	Non-disease gene
					1400	ENSG00000110497	AMBRA1	Non-disease gene
					1401	ENSG00000110514	MADD	Non-disease gene
					1402	ENSG00000110583	NAA40	Non-disease gene
					1403	ENSG00000110660	SLC35F2	Non-disease gene
					1404	ENSG00000110675	ELMOD1	Non-disease gene
					1405	ENSG00000110723	EXPH5	Non-disease gene
					1406	ENSG00000110786	PTPN5	Non-disease gene
					1407	ENSG00000110811	LEPREL2	Non-disease gene
					1408	ENSG00000110841	PPFIBP1	Non-disease gene
					1409	ENSG00000110851	PRDM4	Non-disease gene
					1410	ENSG00000110900	TSPAN11	Non-disease gene
					1411	ENSG00000110906	KCTD10	Non-disease gene
					1412	ENSG00000110925	CSRNP2	Non-disease gene
					1413	ENSG00000110934	BIN2	Non-disease gene
					1414	ENSG00000110975	SYT10	Non-disease gene
					1415	ENSG00000111052	LIN7A	Non-disease gene
					1416	ENSG00000111058	ACSS3	Non-disease gene
					1417	ENSG00000111077	TENC1	Non-disease gene
					1418	ENSG00000111110	PPM1H	Non-disease gene
					1419	ENSG00000111203	ITFG2	Non-disease gene
					1420	ENSG00000111218	PRMT8	Non-disease gene
					1421	ENSG00000111224	PARP11	Non-disease gene
					1422	ENSG00000111231	GPN3	Non-disease gene
					1423	ENSG00000111237	VPS29	Non-disease gene
					1424	ENSG00000111261	MANSC1	Non-disease gene
					1425	ENSG00000111266	DUSP16	Non-disease gene
					1426	ENSG00000111291	GPRC5D	Non-disease gene
					1427	ENSG00000111300	NAA25	Non-disease gene
					1428	ENSG00000111305	GSG1	Non-disease gene
					1429	ENSG00000111325	OGFOD2	Non-disease gene
					1430	ENSG00000111331	OAS3	Non-disease gene
					1431	ENSG00000111344	RASAL1	Non-disease gene
					1432	ENSG00000111358	GTF2H3	Non-disease gene
					1433	ENSG00000111364	DDX55	Non-disease gene
					1434	ENSG00000111371	SLC38A1	Non-disease gene
					1435	ENSG00000111405	ENDOU	Non-disease gene
					1436	ENSG00000111412	C12orf49	Non-disease gene
					1437	ENSG00000111452	GPR133	Non-disease gene
					1438	ENSG00000111490	TBC1D30	Non-disease gene
					1439	ENSG00000111554	MDM1	Non-disease gene
					1440	ENSG00000111581	NUP107	Non-disease gene
					1441	ENSG00000111602	TIMELESS	Non-disease gene
					1442	ENSG00000111605	CPSF6	Non-disease gene
					1443	ENSG00000111615	KRR1	Non-disease gene
					1444	ENSG00000111639	MRPL51	Non-disease gene
					1445	ENSG00000111644	ACRBP	Non-disease gene
					1446	ENSG00000111647	UHRF1BP1L	Non-disease gene
					1447	ENSG00000111652	COPS7A	Non-disease gene
					1448	ENSG00000111665	CDCA3	Non-disease gene
					1449	ENSG00000111667	USP5	Non-disease gene
					1450	ENSG00000111671	SPSB2	Non-disease gene
					1451	ENSG00000111684	U47924.1	Non-disease gene
					1452	ENSG00000111707	SUDS3	Non-disease gene
					1453	ENSG00000111711	GOLT1B	Non-disease gene
					1454	ENSG00000111726	CMAS	Non-disease gene
					1455	ENSG00000111727	HCFC2	Non-disease gene
					1456	ENSG00000111731	KIAA0528	Non-disease gene
					1457	ENSG00000111783	RFX4	Non-disease gene
					1458	ENSG00000111785	RIC8B	Non-disease gene
					1459	ENSG00000111817	DSE	Non-disease gene
					1460	ENSG00000111845	PAK1IP1	Non-disease gene
					1461	ENSG00000111875	ASF1A	Non-disease gene
					1462	ENSG00000111877	MCM9	Non-disease gene
					1463	ENSG00000111879	FAM184A	Non-disease gene
					1464	ENSG00000111880	RNGTT	Non-disease gene
					1465	ENSG00000111907	TPD52L1	Non-disease gene
					1466	ENSG00000111911	HINT3	Non-disease gene
					1467	ENSG00000111912	NCOA7	Non-disease gene
					1468	ENSG00000111913	FAM65B	Non-disease gene
					1469	ENSG00000111962	UST	Non-disease gene
					1470	ENSG00000112029	FBXO5	Non-disease gene
					1471	ENSG00000112031	MTRF1L	Non-disease gene
					1472	ENSG00000112078	KCTD20	Non-disease gene
					1473	ENSG00000112079	STK38	Non-disease gene
					1474	ENSG00000112116	IL17F	Non-disease gene
					1475	ENSG00000112130	RNF8	Non-disease gene
					1476	ENSG00000112137	PHACTR1	Non-disease gene
					1477	ENSG00000112139	MDGA1	Non-disease gene
					1478	ENSG00000112167	C6orf64	Non-disease gene
					1479	ENSG00000112183	RBM24	Non-disease gene
					1480	ENSG00000112186	CAP2	Non-disease gene
					1481	ENSG00000112195	TREML2	Non-disease gene
					1482	ENSG00000112200	ZNF451	Non-disease gene
					1483	ENSG00000112212	TSPO2	Non-disease gene
					1484	ENSG00000112218	GPR63	Non-disease gene
					1485	ENSG00000112232	KHDRBS2	Non-disease gene
					1486	ENSG00000112234	FBXL4	Non-disease gene
					1487	ENSG00000112238	PRDM13	Non-disease gene
					1488	ENSG00000112273	HDGFL1	Non-disease gene
					1489	ENSG00000112276	BVES	Non-disease gene
					1490	ENSG00000112304	ACOT13	Non-disease gene
					1491	ENSG00000112309	B3GAT2	Non-disease gene
					1492	ENSG00000112343	TRIM38	Non-disease gene
					1493	ENSG00000112394	SLC16A10	Non-disease gene
					1494	ENSG00000112419	PHACTR2	Non-disease gene
					1495	ENSG00000112499	SLC22A2	Non-disease gene
					1496	ENSG00000112539	C6orf118	Non-disease gene
					1497	ENSG00000112559	MDFI	Non-disease gene
					1498	ENSG00000112578	BYSL	Non-disease gene
					1499	ENSG00000112584	FAM120B	Non-disease gene
					1500	ENSG00000112624	KIAA0240	Non-disease gene
					1501	ENSG00000112651	MRPL2	Non-disease gene
					1502	ENSG00000112664	NUDT3	Non-disease gene
					1503	ENSG00000112667	C6orf108	Non-disease gene
					1504	ENSG00000112685	EXOC2	Non-disease gene
					1505	ENSG00000112699	GMDS	Non-disease gene
					1506	ENSG00000112742	TTK	Non-disease gene
					1507	ENSG00000112782	CLIC5	Non-disease gene
					1508	ENSG00000112787	FBRSL1	Non-disease gene
					1509	ENSG00000112796	ENPP5	Non-disease gene
					1510	ENSG00000112799	LY86	Non-disease gene
					1511	ENSG00000112812	PRSS16	Non-disease gene
					1512	ENSG00000112837	TBX18	Non-disease gene
					1513	ENSG00000112852	PCDHB2	Non-disease gene
					1514	ENSG00000112874	NUDT12	Non-disease gene
					1515	ENSG00000112877	CEP72	Non-disease gene
					1516	ENSG00000112981	NME5	Non-disease gene
					1517	ENSG00000112984	KIF20A	Non-disease gene
					1518	ENSG00000112992	NNT	Non-disease gene
					1519	ENSG00000113048	MRPS27	Non-disease gene
					1520	ENSG00000113068	PFDN1	Non-disease gene
					1521	ENSG00000113073	SLC4A9	Non-disease gene
					1522	ENSG00000113088	GZMK	Non-disease gene
					1523	ENSG00000113100	CDH9	Non-disease gene
					1524	ENSG00000113119	TMCO6	Non-disease gene
					1525	ENSG00000113163	COL4A3BP	Non-disease gene
					1526	ENSG00000113194	FAF2	Non-disease gene
					1527	ENSG00000113205	PCDHB3	Non-disease gene
					1528	ENSG00000113211	PCDHB6	Non-disease gene
					1529	ENSG00000113212	PCDHB7	Non-disease gene
					1530	ENSG00000113248	PCDHB15	Non-disease gene
					1531	ENSG00000113269	RNF130	Non-disease gene
					1532	ENSG00000113272	THG1L	Non-disease gene
					1533	ENSG00000113300	CNOT6	Non-disease gene
					1534	ENSG00000113312	TTC1	Non-disease gene
					1535	ENSG00000113319	RASGRF2	Non-disease gene
					1536	ENSG00000113356	POLR3G	Non-disease gene
					1537	ENSG00000113369	ARRDC3	Non-disease gene
					1538	ENSG00000113391	FAM172A	Non-disease gene
					1539	ENSG00000113396	SLC27A6	Non-disease gene
					1540	ENSG00000113430	IRX4	Non-disease gene
					1541	ENSG00000113460	BRIX1	Non-disease gene
					1542	ENSG00000113532	ST8SIA4	Non-disease gene
					1543	ENSG00000113555	PCDH12	Non-disease gene
					1544	ENSG00000113595	TRIM23	Non-disease gene
					1545	ENSG00000113597	C5orf44	Non-disease gene
					1546	ENSG00000113638	TTC33	Non-disease gene
					1547	ENSG00000113643	RARS	Non-disease gene
					1548	ENSG00000113645	WWC1	Non-disease gene
					1549	ENSG00000113716	HMGXB3	Non-disease gene
					1550	ENSG00000113719	ERGIC1	Non-disease gene
					1551	ENSG00000113734	BNIP1	Non-disease gene
					1552	ENSG00000113742	CPEB4	Non-disease gene
					1553	ENSG00000113761	ZNF346	Non-disease gene
					1554	ENSG00000113763	UNC5A	Non-disease gene
					1555	ENSG00000113805	CNTN3	Non-disease gene
					1556	ENSG00000113810	SMC4	Non-disease gene
					1557	ENSG00000113812	ACTR8	Non-disease gene
					1558	ENSG00000113838	TBCCD1	Non-disease gene
					1559	ENSG00000113845	C3orf1	Non-disease gene
					1560	ENSG00000114019	AMOTL2	Non-disease gene
					1561	ENSG00000114107	CEP70	Non-disease gene
					1562	ENSG00000114126	TFDP2	Non-disease gene
					1563	ENSG00000114127	XRN1	Non-disease gene
					1564	ENSG00000114248	LRRC31	Non-disease gene
					1565	ENSG00000114279	FGF12	Non-disease gene
					1566	ENSG00000114450	GNB4	Non-disease gene
					1567	ENSG00000114473	IQCG	Non-disease gene
					1568	ENSG00000114487	MORC1	Non-disease gene
					1569	ENSG00000114529	C3orf52	Non-disease gene
					1570	ENSG00000114541	FRMD4B	Non-disease gene
					1571	ENSG00000114544	SLC41A3	Non-disease gene
					1572	ENSG00000114626	ABTB1	Non-disease gene
					1573	ENSG00000114646	CSPG5	Non-disease gene
					1574	ENSG00000114648	KLHL18	Non-disease gene
					1575	ENSG00000114654	CCDC48	Non-disease gene
					1576	ENSG00000114670	NEK11	Non-disease gene
					1577	ENSG00000114698	PLSCR4	Non-disease gene
					1578	ENSG00000114735	HEMK1	Non-disease gene
					1579	ENSG00000114742	WDR48	Non-disease gene
					1580	ENSG00000114744	COMMD2	Non-disease gene
					1581	ENSG00000114745	GORASP1	Non-disease gene
					1582	ENSG00000114757	PEX5L	Non-disease gene
					1583	ENSG00000114767	RRP9	Non-disease gene
					1584	ENSG00000114779	ABHD14B	Non-disease gene
					1585	ENSG00000114790	ARHGEF26	Non-disease gene
					1586	ENSG00000114796	KLHL24	Non-disease gene
					1587	ENSG00000114805	PLCH1	Non-disease gene
					1588	ENSG00000114850	SSR3	Non-disease gene
					1589	ENSG00000114933	INO80D	Non-disease gene
					1590	ENSG00000114978	MOBKL1B	Non-disease gene
					1591	ENSG00000114982	KIAA1310	Non-disease gene
					1592	ENSG00000114988	LMAN2L	Non-disease gene
					1593	ENSG00000114993	RTKN	Non-disease gene
					1594	ENSG00000115073	ACTR1B	Non-disease gene
					1595	ENSG00000115084	SLC35F5	Non-disease gene
					1596	ENSG00000115109	EPB41L5	Non-disease gene
					1597	ENSG00000115112	TFCP2L1	Non-disease gene
					1598	ENSG00000115137	DNAJC27	Non-disease gene
					1599	ENSG00000115145	STAM2	Non-disease gene
					1600	ENSG00000115165	CYTIP	Non-disease gene
					1601	ENSG00000115183	TANC1	Non-disease gene
					1602	ENSG00000115194	SLC30A3	Non-disease gene
					1603	ENSG00000115207	GTF3C2	Non-disease gene
					1604	ENSG00000115226	FNDC4	Non-disease gene
					1605	ENSG00000115234	SNX17	Non-disease gene
					1606	ENSG00000115239	ASB3	Non-disease gene
					1607	ENSG00000115241	PPM1G	Non-disease gene
					1608	ENSG00000115252	PDE1A	Non-disease gene
					1609	ENSG00000115255	REEP6	Non-disease gene
					1610	ENSG00000115257	PCSK4	Non-disease gene
					1611	ENSG00000115274	INO80B	Non-disease gene
					1612	ENSG00000115289	PCGF1	Non-disease gene
					1613	ENSG00000115295	CLIP4	Non-disease gene
					1614	ENSG00000115297	TLX2	Non-disease gene
					1615	ENSG00000115350	POLE4	Non-disease gene
					1616	ENSG00000115355	CCDC88A	Non-disease gene
					1617	ENSG00000115363	FAM176A	Non-disease gene
					1618	ENSG00000115364	MRPL19	Non-disease gene
					1619	ENSG00000115365	LANCL1	Non-disease gene
					1620	ENSG00000115368	WDR75	Non-disease gene
					1621	ENSG00000115421	PAPOLG	Non-disease gene
					1622	ENSG00000115459	ELMOD3	Non-disease gene
					1623	ENSG00000115468	EFHD1	Non-disease gene
					1624	ENSG00000115507	OTX1	Non-disease gene
					1625	ENSG00000115526	CHST10	Non-disease gene
					1626	ENSG00000115539	PDCL3	Non-disease gene
					1627	ENSG00000115556	PLCD4	Non-disease gene
					1628	ENSG00000115561	VPS24	Non-disease gene
					1629	ENSG00000115568	ZNF142	Non-disease gene
					1630	ENSG00000115593	SMYD1	Non-disease gene
					1631	ENSG00000115616	SLC9A2	Non-disease gene
					1632	ENSG00000115649	C2orf24	Non-disease gene
					1633	ENSG00000115652	UXS1	Non-disease gene
					1634	ENSG00000115661	STK16	Non-disease gene
					1635	ENSG00000115694	STK25	Non-disease gene
					1636	ENSG00000115761	NOL10	Non-disease gene
					1637	ENSG00000115808	STRN	Non-disease gene
					1638	ENSG00000115841	FAM82A1	Non-disease gene
					1639	ENSG00000115902	SLC1A4	Non-disease gene
					1640	ENSG00000115942	ORC2L	Non-disease gene
					1641	ENSG00000115946	PNO1	Non-disease gene
					1642	ENSG00000116005	PCYOX1	Non-disease gene
					1643	ENSG00000116035	VAX2	Non-disease gene
					1644	ENSG00000116117	PARD3B	Non-disease gene
					1645	ENSG00000116120	FARSB	Non-disease gene
					1646	ENSG00000116138	DNAJC16	Non-disease gene
					1647	ENSG00000116151	MORN1	Non-disease gene
					1648	ENSG00000116157	GPX7	Non-disease gene
					1649	ENSG00000116176	TPSG1	Non-disease gene
					1650	ENSG00000116183	PAPPA2	Non-disease gene
					1651	ENSG00000116194	ANGPTL1	Non-disease gene
					1652	ENSG00000116198	KIAA0562	Non-disease gene
					1653	ENSG00000116199	FAM20B	Non-disease gene
					1654	ENSG00000116205	C1orf83	Non-disease gene
					1655	ENSG00000116212	LRRC42	Non-disease gene
					1656	ENSG00000116213	WDR8	Non-disease gene
					1657	ENSG00000116221	MRPL37	Non-disease gene
					1658	ENSG00000116260	QSOX1	Non-disease gene
					1659	ENSG00000116273	PHF13	Non-disease gene
					1660	ENSG00000116337	AMPD2	Non-disease gene
					1661	ENSG00000116353	MECR	Non-disease gene
					1662	ENSG00000116406	EDEM3	Non-disease gene
					1663	ENSG00000116455	WDR77	Non-disease gene
					1664	ENSG00000116514	RNF19B	Non-disease gene
					1665	ENSG00000116661	FBXO2	Non-disease gene
					1666	ENSG00000116663	FBXO6	Non-disease gene
					1667	ENSG00000116667	C1orf21	Non-disease gene
					1668	ENSG00000116668	C1orf26	Non-disease gene
					1669	ENSG00000116670	MAD2L2	Non-disease gene
					1670	ENSG00000116685	KIAA2013	Non-disease gene
					1671	ENSG00000116698	SMG7	Non-disease gene
					1672	ENSG00000116729	GPR177	Non-disease gene
					1673	ENSG00000116750	UCHL5	Non-disease gene
					1674	ENSG00000116774	OLFML3	Non-disease gene
					1675	ENSG00000116783	TNNI3K	Non-disease gene
					1676	ENSG00000116786	PLEKHM2	Non-disease gene
					1677	ENSG00000116793	PHTF1	Non-disease gene
					1678	ENSG00000116819	TFAP2E	Non-disease gene
					1679	ENSG00000116852	KIF21B	Non-disease gene
					1680	ENSG00000116863	ADPRHL2	Non-disease gene
					1681	ENSG00000116871	MAP7D1	Non-disease gene
					1682	ENSG00000116874	WARS2	Non-disease gene
					1683	ENSG00000116882	HAO2	Non-disease gene
					1684	ENSG00000116885	OSCP1	Non-disease gene
					1685	ENSG00000116898	MRPS15	Non-disease gene
					1686	ENSG00000116903	EXOC8	Non-disease gene
					1687	ENSG00000116981	NT5C1A	Non-disease gene
					1688	ENSG00000116983	HPCAL4	Non-disease gene
					1689	ENSG00000116991	SIPA1L2	Non-disease gene
					1690	ENSG00000117036	ETV3	Non-disease gene
					1691	ENSG00000117115	PADI2	Non-disease gene
					1692	ENSG00000117133	RPF1	Non-disease gene
					1693	ENSG00000117139	KDM5B	Non-disease gene
					1694	ENSG00000117151	CTBS	Non-disease gene
					1695	ENSG00000117153	KLHL12	Non-disease gene
					1696	ENSG00000117154	IGSF21	Non-disease gene
					1697	ENSG00000117155	SSX2IP	Non-disease gene
					1698	ENSG00000117174	ZNHIT6	Non-disease gene
					1699	ENSG00000117222	RBBP5	Non-disease gene
					1700	ENSG00000117266	PCTK3	Non-disease gene
					1701	ENSG00000117411	B4GALT2	Non-disease gene
					1702	ENSG00000117419	ERI3	Non-disease gene
					1703	ENSG00000117472	TSPAN1	Non-disease gene
					1704	ENSG00000117477	C1orf114	Non-disease gene
					1705	ENSG00000117481	NSUN4	Non-disease gene
					1706	ENSG00000117501	C1orf129	Non-disease gene
					1707	ENSG00000117533	VAMP4	Non-disease gene
					1708	ENSG00000117543	DPH5	Non-disease gene
					1709	ENSG00000117597	C1orf107	Non-disease gene
					1710	ENSG00000117598	RP11-254O21.1	Non-disease gene
					1711	ENSG00000117600	RP4-788L13.1	Non-disease gene
					1712	ENSG00000117602	RCAN3	Non-disease gene
					1713	ENSG00000117625	RCOR3	Non-disease gene
					1714	ENSG00000117640	FAM54B	Non-disease gene
					1715	ENSG00000117643	MAN1C1	Non-disease gene
					1716	ENSG00000117691	NENF	Non-disease gene
					1717	ENSG00000117751	PPP1R8	Non-disease gene
					1718	ENSG00000117758	STX12	Non-disease gene
					1719	ENSG00000117791	MOSC2	Non-disease gene
					1720	ENSG00000117834	SLC5A9	Non-disease gene
					1721	ENSG00000117862	TXNDC12	Non-disease gene
					1722	ENSG00000117868	ESYT2	Non-disease gene
					1723	ENSG00000117906	RCN2	Non-disease gene
					1724	ENSG00000118007	STAG1	Non-disease gene
					1725	ENSG00000118096	IFT46	Non-disease gene
					1726	ENSG00000118156	ZNF541	Non-disease gene
					1727	ENSG00000118160	SLC8A2	Non-disease gene
					1728	ENSG00000118162	KPTN	Non-disease gene
					1729	ENSG00000118197	DDX59	Non-disease gene
					1730	ENSG00000118200	CAMSAP1L1	Non-disease gene
					1731	ENSG00000118242	MREG	Non-disease gene
					1732	ENSG00000118292	C1orf54	Non-disease gene
					1733	ENSG00000118298	CA14	Non-disease gene
					1734	ENSG00000118322	ATP10B	Non-disease gene
					1735	ENSG00000118363	SPCS2	Non-disease gene
					1736	ENSG00000118407	FILIP1	Non-disease gene
					1737	ENSG00000118412	CASP8AP2	Non-disease gene
					1738	ENSG00000118420	UBE2CBP	Non-disease gene
					1739	ENSG00000118434	SPACA1	Non-disease gene
					1740	ENSG00000118454	ANKRD13C	Non-disease gene
					1741	ENSG00000118473	SGIP1	Non-disease gene
					1742	ENSG00000118491	C6orf94	Non-disease gene
					1743	ENSG00000118492	C6orf103	Non-disease gene
					1744	ENSG00000118507	AKAP7	Non-disease gene
					1745	ENSG00000118514	ALDH8A1	Non-disease gene
					1746	ENSG00000118557	PMFBP1	Non-disease gene
					1747	ENSG00000118596	SLC16A7	Non-disease gene
					1748	ENSG00000118600	TMEM5	Non-disease gene
					1749	ENSG00000118690	ARMC2	Non-disease gene
					1750	ENSG00000118733	OLFM3	Non-disease gene
					1751	ENSG00000118804	STBD1	Non-disease gene
					1752	ENSG00000118900	UBN1	Non-disease gene
					1753	ENSG00000118946	PCDH17	Non-disease gene
					1754	ENSG00000118961	C2orf43	Non-disease gene
					1755	ENSG00000119004	CYP20A1	Non-disease gene
					1756	ENSG00000119041	GTF3C3	Non-disease gene
					1757	ENSG00000119125	GDA	Non-disease gene
					1758	ENSG00000119138	KLF9	Non-disease gene
					1759	ENSG00000119147	C2orf40	Non-disease gene
					1760	ENSG00000119185	ITGB1BP1	Non-disease gene
					1761	ENSG00000119203	CPSF3	Non-disease gene
					1762	ENSG00000119227	PIGZ	Non-disease gene
					1763	ENSG00000119231	SENP5	Non-disease gene
					1764	ENSG00000119242	CCDC92	Non-disease gene
					1765	ENSG00000119280	C1orf198	Non-disease gene
					1766	ENSG00000119283	TRIM67	Non-disease gene
					1767	ENSG00000119314	ROD1	Non-disease gene
					1768	ENSG00000119321	FKBP15	Non-disease gene
					1769	ENSG00000119326	CTNNAL1	Non-disease gene
					1770	ENSG00000119328	C9orf6	Non-disease gene
					1771	ENSG00000119333	WDR34	Non-disease gene
					1772	ENSG00000119383	PPP2R4	Non-disease gene
					1773	ENSG00000119403	PHF19	Non-disease gene
					1774	ENSG00000119408	NEK6	Non-disease gene
					1775	ENSG00000119411	BSPRY	Non-disease gene
					1776	ENSG00000119431	HDHD3	Non-disease gene
					1777	ENSG00000119446	RBM18	Non-disease gene
					1778	ENSG00000119457	SLC46A2	Non-disease gene
					1779	ENSG00000119471	HSDL2	Non-disease gene
					1780	ENSG00000119487	MAPKAP1	Non-disease gene
					1781	ENSG00000119522	DENND1A	Non-disease gene
					1782	ENSG00000119537	KDSR	Non-disease gene
					1783	ENSG00000119547	ONECUT2	Non-disease gene
					1784	ENSG00000119559	C19orf25	Non-disease gene
					1785	ENSG00000119574	ZBTB45	Non-disease gene
					1786	ENSG00000119608	PROX2	Non-disease gene
					1787	ENSG00000119616	FCF1	Non-disease gene
					1788	ENSG00000119636	C14orf45	Non-disease gene
					1789	ENSG00000119638	NEK9	Non-disease gene
					1790	ENSG00000119669	C14orf4	Non-disease gene
					1791	ENSG00000119685	TTLL5	Non-disease gene
					1792	ENSG00000119698	PPP4R4	Non-disease gene
					1793	ENSG00000119703	FAM164C	Non-disease gene
					1794	ENSG00000119720	C14orf102	Non-disease gene
					1795	ENSG00000119760	SUPT7L	Non-disease gene
					1796	ENSG00000119771	KLHL29	Non-disease gene
					1797	ENSG00000119777	TMEM214	Non-disease gene
					1798	ENSG00000119787	ATL2	Non-disease gene
					1799	ENSG00000119812	FAM98A	Non-disease gene
					1800	ENSG00000119820	YIPF4	Non-disease gene
					1801	ENSG00000119862	AC008074.1	Non-disease gene
					1802	ENSG00000119865	CNRIP1	Non-disease gene
					1803	ENSG00000119878	CRIPT	Non-disease gene
					1804	ENSG00000119900	OGFRL1	Non-disease gene
					1805	ENSG00000119906	FAM178A	Non-disease gene
					1806	ENSG00000119913	TECTB	Non-disease gene
					1807	ENSG00000119915	ELOVL3	Non-disease gene
					1808	ENSG00000119922	IFIT2	Non-disease gene
					1809	ENSG00000119929	CUTC	Non-disease gene
					1810	ENSG00000119946	CNNM1	Non-disease gene
					1811	ENSG00000119965	C10orf88	Non-disease gene
					1812	ENSG00000119969	HELLS	Non-disease gene
					1813	ENSG00000119979	FAM45A	Non-disease gene
					1814	ENSG00000120029	C10orf76	Non-disease gene
					1815	ENSG00000120051	CCDC147	Non-disease gene
					1816	ENSG00000120063	GNA13	Non-disease gene
					1817	ENSG00000120094	HOXB1	Non-disease gene
					1818	ENSG00000120137	PANK3	Non-disease gene
					1819	ENSG00000120158	RCL1	Non-disease gene
					1820	ENSG00000120160	C9orf11	Non-disease gene
					1821	ENSG00000120162	MOBKL2B	Non-disease gene
					1822	ENSG00000120256	LRP11	Non-disease gene
					1823	ENSG00000120278	PLEKHG1	Non-disease gene
					1824	ENSG00000120279	MYCT1	Non-disease gene
					1825	ENSG00000120280	CXorf21	Non-disease gene
					1826	ENSG00000120318	ARAP3	Non-disease gene
					1827	ENSG00000120324	PCDHB10	Non-disease gene
					1828	ENSG00000120329	SLC25A2	Non-disease gene
					1829	ENSG00000120332	TNN	Non-disease gene
					1830	ENSG00000120334	CENPL	Non-disease gene
					1831	ENSG00000120341	SEC16B	Non-disease gene
					1832	ENSG00000120436	GPR31	Non-disease gene
					1833	ENSG00000120451	SNX19	Non-disease gene
					1834	ENSG00000120458	C11orf61	Non-disease gene
					1835	ENSG00000120498	TEX11	Non-disease gene
					1836	ENSG00000120500	ARR3	Non-disease gene
					1837	ENSG00000120509	PDZD11	Non-disease gene
					1838	ENSG00000120519	SLC10A7	Non-disease gene
					1839	ENSG00000120526	NUDCD1	Non-disease gene
					1840	ENSG00000120533	ENY2	Non-disease gene
					1841	ENSG00000120549	KIAA1217	Non-disease gene
					1842	ENSG00000120594	PLXDC2	Non-disease gene
					1843	ENSG00000120616	EPC1	Non-disease gene
					1844	ENSG00000120645	IQSEC3	Non-disease gene
					1845	ENSG00000120647	CCDC77	Non-disease gene
					1846	ENSG00000120656	TAF12	Non-disease gene
					1847	ENSG00000120658	ENOX1	Non-disease gene
					1848	ENSG00000120662	MTRF1	Non-disease gene
					1849	ENSG00000120675	DNAJC15	Non-disease gene
					1850	ENSG00000120685	C13orf23	Non-disease gene
					1851	ENSG00000120688	WBP4	Non-disease gene
					1852	ENSG00000120696	KBTBD7	Non-disease gene
					1853	ENSG00000120727	PAIP2	Non-disease gene
					1854	ENSG00000120756	PLS1	Non-disease gene
					1855	ENSG00000120784	ZFP30	Non-disease gene
					1856	ENSG00000120805	ARL1	Non-disease gene
					1857	ENSG00000120820	GLT8D2	Non-disease gene
					1858	ENSG00000120832	MTERFD3	Non-disease gene
					1859	ENSG00000120837	NFYB	Non-disease gene
					1860	ENSG00000120860	CCDC53	Non-disease gene
					1861	ENSG00000120896	SORBS3	Non-disease gene
					1862	ENSG00000120913	PDLIM2	Non-disease gene
					1863	ENSG00000121005	CRISPLD1	Non-disease gene
					1864	ENSG00000121039	RDH10	Non-disease gene
					1865	ENSG00000121057	AKAP1	Non-disease gene
					1866	ENSG00000121073	SLC35B1	Non-disease gene
					1867	ENSG00000121152	NCAPH	Non-disease gene
					1868	ENSG00000121210	KIAA0922	Non-disease gene
					1869	ENSG00000121211	MND1	Non-disease gene
					1870	ENSG00000121236	TRIM6	Non-disease gene
					1871	ENSG00000121274	PAPD5	Non-disease gene
					1872	ENSG00000121281	ADCY7	Non-disease gene
					1873	ENSG00000121289	CCDC123	Non-disease gene
					1874	ENSG00000121297	TSHZ3	Non-disease gene
					1875	ENSG00000121310	ECHDC2	Non-disease gene
					1876	ENSG00000121316	PLBD1	Non-disease gene
					1877	ENSG00000121377	TAS2R7	Non-disease gene
					1878	ENSG00000121413	ZSCAN18	Non-disease gene
					1879	ENSG00000121440	PDZRN3	Non-disease gene
					1880	ENSG00000121481	RNF2	Non-disease gene
					1881	ENSG00000121486	C1orf25	Non-disease gene
					1882	ENSG00000121542	SEC22A	Non-disease gene
					1883	ENSG00000121577	POPDC2	Non-disease gene
					1884	ENSG00000121578	B4GALT4	Non-disease gene
					1885	ENSG00000121579	NAA50	Non-disease gene
					1886	ENSG00000121644	PPPDE1	Non-disease gene
					1887	ENSG00000121671	CRY2	Non-disease gene
					1888	ENSG00000121690	DEPDC7	Non-disease gene
					1889	ENSG00000121766	ZCCHC17	Non-disease gene
					1890	ENSG00000121775	TMEM39B	Non-disease gene
					1891	ENSG00000121851	POLR3GL	Non-disease gene
					1892	ENSG00000121864	ZNF639	Non-disease gene
					1893	ENSG00000121871	SLITRK3	Non-disease gene
					1894	ENSG00000121892	PDS5A	Non-disease gene
					1895	ENSG00000121895	TMEM156	Non-disease gene
					1896	ENSG00000121898	CPXM2	Non-disease gene
					1897	ENSG00000121903	ZSCAN20	Non-disease gene
					1898	ENSG00000121905	HPCA	Non-disease gene
					1899	ENSG00000121931	C1orf103	Non-disease gene
					1900	ENSG00000121940	CLCC1	Non-disease gene
					1901	ENSG00000121964	GTDC1	Non-disease gene
					1902	ENSG00000121988	ZRANB3	Non-disease gene
					1903	ENSG00000122012	SV2C	Non-disease gene
					1904	ENSG00000122033	MTIF3	Non-disease gene
					1905	ENSG00000122035	RASL11A	Non-disease gene
					1906	ENSG00000122068	FYTTD1	Non-disease gene
					1907	ENSG00000122085	MTERFD2	Non-disease gene
					1908	ENSG00000122122	SASH3	Non-disease gene
					1909	ENSG00000122140	MRPS2	Non-disease gene
					1910	ENSG00000122188	LAX1	Non-disease gene
					1911	ENSG00000122203	KIAA1191	Non-disease gene
					1912	ENSG00000122224	LY9	Non-disease gene
					1913	ENSG00000122257	RBBP6	Non-disease gene
					1914	ENSG00000122335	SERAC1	Non-disease gene
					1915	ENSG00000122378	C10orf57	Non-disease gene
					1916	ENSG00000122386	ZNF205	Non-disease gene
					1917	ENSG00000122417	ODF2L	Non-disease gene
					1918	ENSG00000122432	SPATA1	Non-disease gene
					1919	ENSG00000122435	CCDC76	Non-disease gene
					1920	ENSG00000122477	LRRC39	Non-disease gene
					1921	ENSG00000122481	RWDD3	Non-disease gene
					1922	ENSG00000122483	CCDC18	Non-disease gene
					1923	ENSG00000122484	RPAP2	Non-disease gene
					1924	ENSG00000122490	PQLC1	Non-disease gene
					1925	ENSG00000122515	ZMIZ2	Non-disease gene
					1926	ENSG00000122547	EEPD1	Non-disease gene
					1927	ENSG00000122557	HERPUD2	Non-disease gene
					1928	ENSG00000122574	WIPF3	Non-disease gene
					1929	ENSG00000122584	NXPH1	Non-disease gene
					1930	ENSG00000122642	FKBP9	Non-disease gene
					1931	ENSG00000122687	FTSJ2	Non-disease gene
					1932	ENSG00000122692	SMU1	Non-disease gene
					1933	ENSG00000122711	SPINK4	Non-disease gene
					1934	ENSG00000122733	KIAA1045	Non-disease gene
					1935	ENSG00000122741	DCAF10	Non-disease gene
					1936	ENSG00000122778	KIAA1549	Non-disease gene
					1937	ENSG00000122873	CISD1	Non-disease gene
					1938	ENSG00000122965	RBM19	Non-disease gene
					1939	ENSG00000122970	IFT81	Non-disease gene
					1940	ENSG00000123064	DDX54	Non-disease gene
					1941	ENSG00000123119	NECAB1	Non-disease gene
					1942	ENSG00000123144	C19orf43	Non-disease gene
					1943	ENSG00000123154	WDR83	Non-disease gene
					1944	ENSG00000123165	ACTRT1	Non-disease gene
					1945	ENSG00000123171	CCDC70	Non-disease gene
					1946	ENSG00000123200	ZC3H13	Non-disease gene
					1947	ENSG00000123201	GUCY1B2	Non-disease gene
					1948	ENSG00000123213	NLN	Non-disease gene
					1949	ENSG00000123219	CENPK	Non-disease gene
					1950	ENSG00000123307	NEUROD4	Non-disease gene
					1951	ENSG00000123338	NCKAP1L	Non-disease gene
					1952	ENSG00000123352	SPATS2	Non-disease gene
					1953	ENSG00000123353	ORMDL2	Non-disease gene
					1954	ENSG00000123360	PDE1B	Non-disease gene
					1955	ENSG00000123364	HOXC13	Non-disease gene
					1956	ENSG00000123395	C12orf44	Non-disease gene
					1957	ENSG00000123407	HOXC12	Non-disease gene
					1958	ENSG00000123415	SMUG1	Non-disease gene
					1959	ENSG00000123427	FAM119B	Non-disease gene
					1960	ENSG00000123444	KBTBD4	Non-disease gene
					1961	ENSG00000123472	ATPAF1	Non-disease gene
					1962	ENSG00000123485	HJURP	Non-disease gene
					1963	ENSG00000123570	RAB9B	Non-disease gene
					1964	ENSG00000123575	FAM199X	Non-disease gene
					1965	ENSG00000123600	METTL8	Non-disease gene
					1966	ENSG00000123643	SLC36A1	Non-disease gene
					1967	ENSG00000123689	G0S2	Non-disease gene
					1968	ENSG00000123728	RAP2C	Non-disease gene
					1969	ENSG00000123739	PLA2G12A	Non-disease gene
					1970	ENSG00000123815	ADCK4	Non-disease gene
					1971	ENSG00000123836	PFKFB2	Non-disease gene
					1972	ENSG00000123901	GPR83	Non-disease gene
					1973	ENSG00000123933	MXD4	Non-disease gene
					1974	ENSG00000123977	WDR69	Non-disease gene
					1975	ENSG00000123989	CHPF	Non-disease gene
					1976	ENSG00000123992	DNPEP	Non-disease gene
					1977	ENSG00000124003	MOGAT1	Non-disease gene
					1978	ENSG00000124019	FAM124B	Non-disease gene
					1979	ENSG00000124074	C16orf48	Non-disease gene
					1980	ENSG00000124091	GCNT7	Non-disease gene
					1981	ENSG00000124098	C20orf108	Non-disease gene
					1982	ENSG00000124104	SNX21	Non-disease gene
					1983	ENSG00000124116	WFDC3	Non-disease gene
					1984	ENSG00000124120	TTPAL	Non-disease gene
					1985	ENSG00000124126	PREX1	Non-disease gene
					1986	ENSG00000124140	SLC12A5	Non-disease gene
					1987	ENSG00000124143	C20orf95	Non-disease gene
					1988	ENSG00000124155	PIGT	Non-disease gene
					1989	ENSG00000124159	MATN4	Non-disease gene
					1990	ENSG00000124160	NCOA5	Non-disease gene
					1991	ENSG00000124191	C20orf100	Non-disease gene
					1992	ENSG00000124194	GDAP1L1	Non-disease gene
					1993	ENSG00000124203	ZNF831	Non-disease gene
					1994	ENSG00000124215	CDH26	Non-disease gene
					1995	ENSG00000124217	MOCS3	Non-disease gene
					1996	ENSG00000124227	ANKRD60	Non-disease gene
					1997	ENSG00000124228	DDX27	Non-disease gene
					1998	ENSG00000124232	RBPJL	Non-disease gene
[truncated: 5,580 more rows]

## Sheet: Sheet2
Serial no.	Ensembl Gene ID	Gene_name	Type
1	ENSG00000148584	A1CF	Non-disease gene
2	ENSG00000134864	A2LD1	Non-disease gene
3	ENSG00000081760	AACS	Non-disease gene
4	ENSG00000144959	AADACL1	Non-disease gene
5	ENSG00000188984	AADACL3	Non-disease gene
6	ENSG00000103591	AAGAB	Non-disease gene
7	ENSG00000127837	AAMP	Non-disease gene
8	ENSG00000124608	AARS2	Non-disease gene
9	ENSG00000108825	AARSD1	Non-disease gene
10	ENSG00000157426	AASDH	Non-disease gene
11	ENSG00000108270	AATF	Non-disease gene
12	ENSG00000181409	AATK	Non-disease gene
13	ENSG00000154258	ABCA9	Non-disease gene
14	ENSG00000150967	ABCB9	Non-disease gene
15	ENSG00000140798	ABCC12	Non-disease gene
16	ENSG00000161204	ABCF3	Non-disease gene
17	ENSG00000172350	ABCG4	Non-disease gene
18	ENSG00000139826	ABHD13	Non-disease gene
19	ENSG00000114779	ABHD14B	Non-disease gene
20	ENSG00000168792	ABHD15	Non-disease gene
21	ENSG00000140526	ABHD2	Non-disease gene
22	ENSG00000158201	ABHD3	Non-disease gene
23	ENSG00000100439	ABHD4	Non-disease gene
24	ENSG00000163686	ABHD6	Non-disease gene
25	ENSG00000127220	ABHD8	Non-disease gene
26	ENSG00000138443	ABI2	Non-disease gene
27	ENSG00000108798	ABI3	Non-disease gene
28	ENSG00000163995	ABLIM2	Non-disease gene
29	ENSG00000173210	ABLIM3	Non-disease gene
30	ENSG00000146109	ABT1	Non-disease gene
31	ENSG00000114626	ABTB1	Non-disease gene
32	ENSG00000166016	ABTB2	Non-disease gene
33	ENSG00000240720	AC000120.8	Non-disease gene
34	ENSG00000187905	AC002472.13	Non-disease gene
35	ENSG00000005189	AC004381.6	Non-disease gene
36	ENSG00000005206	AC004410.1	Non-disease gene
37	ENSG00000205858	AC005014.4	Non-disease gene
38	ENSG00000167524	AC005726.6	Non-disease gene
39	ENSG00000206044	AC005841.1	Non-disease gene
40	ENSG00000141194	AC005962.2	Non-disease gene
41	ENSG00000124455	AC006276.1	Non-disease gene
42	ENSG00000204334	AC007405.7	Non-disease gene
43	ENSG00000166329	AC007431.1	Non-disease gene
44	ENSG00000232856	AC008038.1	Non-disease gene
45	ENSG00000119862	AC008074.1	Non-disease gene
46	ENSG00000130612	AC008537.1	Non-disease gene
47	ENSG00000179954	AC008735.1	Non-disease gene
48	ENSG00000235034	AC008743.7	Non-disease gene
49	ENSG00000205693	AC009509.2	Non-disease gene
50	ENSG00000171999	AC009758.1	Non-disease gene
51	ENSG00000183248	AC010336.2	Non-disease gene
52	ENSG00000131152	AC010531.3	Non-disease gene
53	ENSG00000142534	AC010619.1	Non-disease gene
54	ENSG00000248602	AC010973.1	Non-disease gene
55	ENSG00000183760	AC011443.1	Non-disease gene
56	ENSG00000213926	AC011445.1	Non-disease gene
57	ENSG00000130173	AC011472.1	Non-disease gene
58	ENSG00000167674	AC011498.2	Non-disease gene
59	ENSG00000186838	AC011500.1	Non-disease gene
60	ENSG00000138600	AC012100.1	Non-disease gene
61	ENSG00000228200	AC012313.1	Non-disease gene
62	ENSG00000103540	AC012621.2	Non-disease gene
63	ENSG00000187446	AC012652.1	Non-disease gene
64	ENSG00000091436	AC013461.1	Non-disease gene
65	ENSG00000186198	AC013553.1	Non-disease gene
66	ENSG00000236302	AC015724.1	Non-disease gene
67	ENSG00000172878	AC015976.3	Non-disease gene
68	ENSG00000230778	AC020658.1	Non-disease gene
69	ENSG00000233493	AC020922.1	Non-disease gene
70	ENSG00000078687	AC021593.2	Non-disease gene
71	ENSG00000141858	AC022098.3	Non-disease gene
72	ENSG00000180909	AC022762.1	Non-disease gene
73	ENSG00000197065	AC023632.1	Non-disease gene
74	ENSG00000205832	AC023830.3	Non-disease gene
75	ENSG00000166503	AC024270.1	Non-disease gene
76	ENSG00000105520	AC024575.2	Non-disease gene
77	ENSG00000249961	AC044802.2	Non-disease gene
78	ENSG00000163075	AC069154.2	Non-disease gene
79	ENSG00000157837	AC069234.1	Non-disease gene
80	ENSG00000163959	AC069257.9	Non-disease gene
81	ENSG00000205307	AC069281.1	Non-disease gene
82	ENSG00000230744	AC073878.1	Non-disease gene
83	ENSG00000184378	AC078802.1	Non-disease gene
84	ENSG00000182329	AC079354.1	Non-disease gene
85	ENSG00000249323	AC090952.2	Non-disease gene
86	ENSG00000182208	AC091196.1	Non-disease gene
87	ENSG00000232329	AC092718.2	Non-disease gene
88	ENSG00000153815	AC099524.1	Non-disease gene
89	ENSG00000178404	AC100788.1	Non-disease gene
90	ENSG00000197426	AC103710.1	Non-disease gene
91	ENSG00000228117	AC103849.1	Non-disease gene
92	ENSG00000234337	AC103988.2	Non-disease gene
93	ENSG00000105694	AC104537.1	Non-disease gene
94	ENSG00000173517	AC107883.1	Non-disease gene
95	ENSG00000223521	AC107977.3	Non-disease gene
96	ENSG00000228146	AC108134.5	Non-disease gene
97	ENSG00000204791	AC109322.1	Non-disease gene
98	ENSG00000180044	AC112641.1	Non-disease gene
99	ENSG00000235063	AC113208.3	Non-disease gene
100	ENSG00000224974	AC113211.1	Non-disease gene
101	ENSG00000188971	AC114772.2	Non-disease gene
102	ENSG00000182698	AC114803.2	Non-disease gene
103	ENSG00000228975	AC119396.1	Non-disease gene
104	ENSG00000166869	AC130454.2	Non-disease gene
105	ENSG00000204583	AC131212.1	Non-disease gene
106	ENSG00000198555	AC133561.1	Non-disease gene
107	ENSG00000226074	AC134504.3	Non-disease gene
108	ENSG00000250305	AC135352.1	Non-disease gene
109	ENSG00000228672	AC135457.1	Non-disease gene
110	ENSG00000236840	AC138517.1	Non-disease gene
111	ENSG00000226490	AC138647.1	Non-disease gene
112	ENSG00000233608	AC149644.1	Non-disease gene
113	ENSG00000185294	AC217771.1	Non-disease gene
114	ENSG00000167315	ACAA2	Non-disease gene
115	ENSG00000240303	ACAD11	Non-disease gene
116	ENSG00000072818	ACAP1	Non-disease gene
117	ENSG00000131584	ACAP3	Non-disease gene
118	ENSG00000181513	ACBD4	Non-disease gene
119	ENSG00000023843	ACCN5	Non-disease gene
120	ENSG00000205126	ACCSL	Non-disease gene
121	ENSG00000167769	ACER1	Non-disease gene
122	ENSG00000177076	ACER2	Non-disease gene
123	ENSG00000078124	ACER3	Non-disease gene
124	ENSG00000100813	ACIN1	Non-disease gene
125	ENSG00000153086	ACMSD	Non-disease gene
126	ENSG00000162390	ACOT11	Non-disease gene
127	ENSG00000172497	ACOT12	Non-disease gene
128	ENSG00000112304	ACOT13	Non-disease gene
129	ENSG00000177465	ACOT4	Non-disease gene
130	ENSG00000205669	ACOT6	Non-disease gene
131	ENSG00000101473	ACOT8	Non-disease gene
132	ENSG00000168306	ACOX2	Non-disease gene
133	ENSG00000087008	ACOX3	Non-disease gene
134	ENSG00000153093	ACOXL	Non-disease gene
135	ENSG00000162836	ACP6	Non-disease gene
136	ENSG00000155893	ACPL2	Non-disease gene
137	ENSG00000142513	ACPT	Non-disease gene
138	ENSG00000111644	ACRBP	Non-disease gene
139	ENSG00000134940	ACRV1	Non-disease gene
140	ENSG00000130377	ACSBG2	Non-disease gene
141	ENSG00000167107	ACSF2	Non-disease gene
142	ENSG00000166743	ACSM1	Non-disease gene
143	ENSG00000215009	ACSM4	Non-disease gene
144	ENSG00000183549	ACSM5	Non-disease gene
145	ENSG00000154930	ACSS1	Non-disease gene
146	ENSG00000131069	ACSS2	Non-disease gene
147	ENSG00000111058	ACSS3	Non-disease gene
148	ENSG00000169067	ACTBL2	Non-disease gene
149	ENSG00000136518	ACTL6A	Non-disease gene
150	ENSG00000077080	ACTL6B	Non-disease gene
151	ENSG00000187003	ACTL7A	Non-disease gene
152	ENSG00000148156	ACTL7B	Non-disease gene
153	ENSG00000115073	ACTR1B	Non-disease gene
154	ENSG00000101442	ACTR5	Non-disease gene
155	ENSG00000075089	ACTR6	Non-disease gene
156	ENSG00000113812	ACTR8	Non-disease gene
157	ENSG00000123165	ACTRT1	Non-disease gene
158	ENSG00000169717	ACTRT2	Non-disease gene
159	ENSG00000132744	ACY3	Non-disease gene
160	ENSG00000186529	AD000685.1	Non-disease gene
161	ENSG00000105261	AD001527.1	Non-disease gene
162	ENSG00000140955	ADAD2	Non-disease gene
163	ENSG00000168803	ADAL	Non-disease gene
164	ENSG00000168619	ADAM18	Non-disease gene
165	ENSG00000008277	ADAM22	Non-disease gene
166	ENSG00000168594	ADAM29	Non-disease gene
167	ENSG00000134249	ADAM30	Non-disease gene
168	ENSG00000197140	ADAM32	Non-disease gene
169	ENSG00000151388	ADAMTS12	Non-disease gene
170	ENSG00000156140	ADAMTS3	Non-disease gene
171	ENSG00000049192	ADAMTS6	Non-disease gene
172	ENSG00000136378	ADAMTS7	Non-disease gene
173	ENSG00000134917	ADAMTS8	Non-disease gene
174	ENSG00000178031	ADAMTSL1	Non-disease gene
175	ENSG00000185761	ADAMTSL5	Non-disease gene
176	ENSG00000105963	ADAP1	Non-disease gene
177	ENSG00000185736	ADARB2	Non-disease gene
178	ENSG00000065457	ADAT1	Non-disease gene
179	ENSG00000189007	ADAT2	Non-disease gene
180	ENSG00000213638	ADAT3	Non-disease gene
181	ENSG00000063761	ADCK1	Non-disease gene
182	ENSG00000133597	ADCK2	Non-disease gene
183	ENSG00000123815	ADCK4	Non-disease gene
184	ENSG00000173137	ADCK5	Non-disease gene
185	ENSG00000129467	ADCY4	Non-disease gene
186	ENSG00000173175	ADCY5	Non-disease gene
187	ENSG00000121281	ADCY7	Non-disease gene
188	ENSG00000147576	ADHFE1	Non-disease gene
189	ENSG00000101544	ADNP2	Non-disease gene
190	ENSG00000159322	ADPGK	Non-disease gene
191	ENSG00000144843	ADPRH	Non-disease gene
192	ENSG00000153531	ADPRHL1	Non-disease gene
193	ENSG00000116863	ADPRHL2	Non-disease gene
194	ENSG00000222040	ADRA2B	Non-disease gene
195	ENSG00000185100	ADSSL1	Non-disease gene
196	ENSG00000139154	AEBP2	Non-disease gene
197	ENSG00000181026	AEN	Non-disease gene
198	ENSG00000196526	AFAP1	Non-disease gene
199	ENSG00000157510	AFAP1L1	Non-disease gene
200	ENSG00000169129	AFAP1L2	Non-disease gene
201	ENSG00000183077	AFMID	Non-disease gene
202	ENSG00000133612	AGAP3	Non-disease gene
203	ENSG00000166748	AGBL1	Non-disease gene
204	ENSG00000165923	AGBL2	Non-disease gene
205	ENSG00000146856	AGBL3	Non-disease gene
206	ENSG00000084693	AGBL5	Non-disease gene
207	ENSG00000173744	AGFG1	Non-disease gene
208	ENSG00000106351	AGFG2	Non-disease gene
209	ENSG00000160216	AGPAT3	Non-disease gene
210	ENSG00000026652	AGPAT4	Non-disease gene
211	ENSG00000158669	AGPAT6	Non-disease gene
212	ENSG00000138678	AGPAT9	Non-disease gene
213	ENSG00000188266	AGPHD1	Non-disease gene
214	ENSG00000173467	AGR3	Non-disease gene
215	ENSG00000135049	AGTPBP1	Non-disease gene
216	ENSG00000175309	AGXT2L2	Non-disease gene
217	ENSG00000158467	AHCYL2	Non-disease gene
218	ENSG00000126705	AHDC1	Non-disease gene
219	ENSG00000173209	AHSA2	Non-disease gene
220	ENSG00000126878	AIF1L	Non-disease gene
221	ENSG00000042286	AIFM2	Non-disease gene
222	ENSG00000183773	AIFM3	Non-disease gene
223	ENSG00000146416	AIG1	Non-disease gene
224	ENSG00000176092	AIM1L	Non-disease gene
225	ENSG00000147853	AK3	Non-disease gene
226	ENSG00000154027	AK5	Non-disease gene
227	ENSG00000140057	AK7	Non-disease gene
228	ENSG00000121057	AKAP1	Non-disease gene
229	ENSG00000186471	AKAP14	Non-disease gene
230	ENSG00000118507	AKAP7	Non-disease gene
231	ENSG00000105127	AKAP8	Non-disease gene
232	ENSG00000174574	AKIRIN1	Non-disease gene
233	ENSG00000135334	AKIRIN2	Non-disease gene
234	ENSG00000106948	AKNA	Non-disease gene
235	ENSG00000162641	AKNAD1	Non-disease gene
236	ENSG00000165568	AKR1E2	Non-disease gene
237	ENSG00000204673	AKT1S1	Non-disease gene
238	ENSG00000166971	AKTIP	Non-disease gene
239	ENSG00000214338	AL096711.1	Non-disease gene
240	ENSG00000165943	AL110118.1	Non-disease gene
241	ENSG00000198752	AL117209.2	Non-disease gene
242	ENSG00000175985	AL133445.1	Non-disease gene
243	ENSG00000237134	AL157893.1	Non-disease gene
244	ENSG00000181437	AL512631.1	Non-disease gene
245	ENSG00000220191	AL512662.2	Non-disease gene
246	ENSG00000230242	AL627231.1	Non-disease gene
247	ENSG00000136010	ALDH1L2	Non-disease gene
248	ENSG00000132746	ALDH3B2	Non-disease gene
249	ENSG00000118514	ALDH8A1	Non-disease gene
250	ENSG00000101901	ALG13	Non-disease gene
251	ENSG00000172339	ALG14	Non-disease gene
252	ENSG00000100601	ALKBH1	Non-disease gene
253	ENSG00000189046	ALKBH2	Non-disease gene
254	ENSG00000166199	ALKBH3	Non-disease gene
255	ENSG00000160993	ALKBH4	Non-disease gene
256	ENSG00000091542	ALKBH5	Non-disease gene
257	ENSG00000239382	ALKBH6	Non-disease gene
258	ENSG00000125652	ALKBH7	Non-disease gene
259	ENSG00000073331	ALPK1	Non-disease gene
260	ENSG00000136383	ALPK3	Non-disease gene
261	ENSG00000155749	ALS2CR12	Non-disease gene
262	ENSG00000138380	ALS2CR8	Non-disease gene
263	ENSG00000110497	AMBRA1	Non-disease gene
264	ENSG00000139344	AMDHD1	Non-disease gene
265	ENSG00000162066	AMDHD2	Non-disease gene
266	ENSG00000160593	AMICA1	Non-disease gene
267	ENSG00000181754	AMIGO1	Non-disease gene
268	ENSG00000139211	AMIGO2	Non-disease gene
269	ENSG00000176020	AMIGO3	Non-disease gene
270	ENSG00000144233	AMMECR1L	Non-disease gene
271	ENSG00000151743	AMN1	Non-disease gene
272	ENSG00000126016	AMOT	Non-disease gene
273	ENSG00000166025	AMOTL1	Non-disease gene
274	ENSG00000114019	AMOTL2	Non-disease gene
275	ENSG00000116337	AMPD2	Non-disease gene
276	ENSG00000187689	AMTN	Non-disease gene
277	ENSG00000174945	AMZ1	Non-disease gene
278	ENSG00000166295	ANAPC16	Non-disease gene
279	ENSG00000176248	ANAPC2	Non-disease gene
280	ENSG00000053900	ANAPC4	Non-disease gene
281	ENSG00000196510	ANAPC7	Non-disease gene
282	ENSG00000013523	ANGEL1	Non-disease gene
283	ENSG00000174606	ANGEL2	Non-disease gene
284	ENSG00000116194	ANGPTL1	Non-disease gene
285	ENSG00000171819	ANGPTL7	Non-disease gene
286	ENSG00000151687	ANKAR	Non-disease gene
287	ENSG00000166839	ANKDD1A	Non-disease gene
288	ENSG00000153930	ANKFN1	Non-disease gene
289	ENSG00000185722	ANKFY1	Non-disease gene
290	ENSG00000001629	ANKIB1	Non-disease gene
291	ENSG00000160117	ANKLE1	Non-disease gene
292	ENSG00000176915	ANKLE2	Non-disease gene
293	ENSG00000144504	ANKMY1	Non-disease gene
294	ENSG00000076513	ANKRD13A	Non-disease gene
295	ENSG00000198720	ANKRD13B	Non-disease gene
296	ENSG00000118454	ANKRD13C	Non-disease gene
297	ENSG00000172932	ANKRD13D	Non-disease gene
298	ENSG00000134461	ANKRD16	Non-disease gene
299	ENSG00000165887	ANKRD2	Non-disease gene
300	ENSG00000152766	ANKRD22	Non-disease gene
301	ENSG00000163126	ANKRD23	Non-disease gene
302	ENSG00000089847	ANKRD24	Non-disease gene
303	ENSG00000206560	ANKRD28	Non-disease gene
304	ENSG00000154065	ANKRD29	Non-disease gene
305	ENSG00000133302	ANKRD32	Non-disease gene
306	ENSG00000167612	ANKRD33	Non-disease gene
307	ENSG00000164236	ANKRD33B	Non-disease gene
308	ENSG00000181039	ANKRD34A	Non-disease gene
309	ENSG00000189127	ANKRD34B	Non-disease gene
310	ENSG00000235711	ANKRD34C	Non-disease gene
311	ENSG00000198483	ANKRD35	Non-disease gene
312	ENSG00000186352	ANKRD37	Non-disease gene
313	ENSG00000213337	ANKRD39	Non-disease gene
314	ENSG00000154945	ANKRD40	Non-disease gene
315	ENSG00000137494	ANKRD42	Non-disease gene
316	ENSG00000198944	ANKRD43	Non-disease gene
317	ENSG00000065413	ANKRD44	Non-disease gene
318	ENSG00000183831	ANKRD45	Non-disease gene
319	ENSG00000186106	ANKRD46	Non-disease gene
320	ENSG00000168876	ANKRD49	Non-disease gene
321	ENSG00000132623	ANKRD5	Non-disease gene
322	ENSG00000151458	ANKRD50	Non-disease gene
323	ENSG00000144031	ANKRD53	Non-disease gene
324	ENSG00000100124	ANKRD54	Non-disease gene
325	ENSG00000164512	ANKRD55	Non-disease gene
326	ENSG00000186212	ANKRD56	Non-disease gene
327	ENSG00000198142	ANKRD57	Non-disease gene
328	ENSG00000187808	ANKRD58	Non-disease gene
329	ENSG00000135299	ANKRD6	Non-disease gene
330	ENSG00000124227	ANKRD60	Non-disease gene
331	ENSG00000157999	ANKRD61	Non-disease gene
332	ENSG00000106013	ANKRD7	Non-disease gene
333	ENSG00000156381	ANKRD9	Non-disease gene
334	ENSG00000168096	ANKS3	Non-disease gene
335	ENSG00000175311	ANKS4B	Non-disease gene
336	ENSG00000011426	ANLN	Non-disease gene
337	ENSG00000134343	ANO3	Non-disease gene
338	ENSG00000151572	ANO4	Non-disease gene
339	ENSG00000074855	ANO8	Non-disease gene
340	ENSG00000172671	ANUBL1	Non-disease gene
341	ENSG00000104537	ANXA13	Non-disease gene
342	ENSG00000143412	ANXA9	Non-disease gene
343	ENSG00000131480	AOC2	Non-disease gene
344	ENSG00000222018	AP000322.54	Non-disease gene
345	ENSG00000214788	AP000790.1	Non-disease gene
346	ENSG00000166250	AP000926.1	Non-disease gene
347	ENSG00000174684	AP001107.3	Non-disease gene
348	ENSG00000181296	AP001803.1	Non-disease gene
349	ENSG00000225688	AP001972.1	Non-disease gene
350	ENSG00000235678	AP002358.2	Non-disease gene
351	ENSG00000248712	AP002956.3	Non-disease gene
352	ENSG00000198261	AP003778.2	Non-disease gene
353	ENSG00000138660	AP1AR	Non-disease gene
354	ENSG00000166747	AP1G1	Non-disease gene
355	ENSG00000213983	AP1G2	Non-disease gene
356	ENSG00000072958	AP1M1	Non-disease gene
357	ENSG00000129354	AP1M2	Non-disease gene
358	ENSG00000152056	AP1S3	Non-disease gene
359	ENSG00000196961	AP2A1	Non-disease gene
360	ENSG00000183020	AP2A2	Non-disease gene
361	ENSG00000006125	AP2B1	Non-disease gene
362	ENSG00000161203	AP2M1	Non-disease gene
363	ENSG00000185009	AP3M1	Non-disease gene
364	ENSG00000070718	AP3M2	Non-disease gene
365	ENSG00000157823	AP3S2	Non-disease gene
366	ENSG00000011132	APBA3	Non-disease gene
367	ENSG00000077420	APBB1IP	Non-disease gene
368	ENSG00000169188	APEX2	Non-disease gene
369	ENSG00000169621	APLF	Non-disease gene
370	ENSG00000134817	APLNR	Non-disease gene
371	ENSG00000163382	APOA1BP	Non-disease gene
372	ENSG00000124701	APOBEC2	Non-disease gene
373	ENSG00000173627	APOBEC4	Non-disease gene
374	ENSG00000221963	APOL6	Non-disease gene
375	ENSG00000155008	APOOL	Non-disease gene
376	ENSG00000157500	APPL1	Non-disease gene
377	ENSG00000086159	AQP6	Non-disease gene
378	ENSG00000021776	AQR	Non-disease gene
379	ENSG00000186635	ARAP1	Non-disease gene
380	ENSG00000047365	ARAP2	Non-disease gene
381	ENSG00000120318	ARAP3	Non-disease gene
382	ENSG00000004059	ARF5	Non-disease gene
383	ENSG00000164144	ARFIP1	Non-disease gene
384	ENSG00000101246	ARFRP1	Non-disease gene
385	ENSG00000071205	ARHGAP10	Non-disease gene
386	ENSG00000165322	ARHGAP12	Non-disease gene
387	ENSG00000075884	ARHGAP15	Non-disease gene
388	ENSG00000140750	ARHGAP17	Non-disease gene
389	ENSG00000146376	ARHGAP18	Non-disease gene
390	ENSG00000213390	ARHGAP19	Non-disease gene
391	ENSG00000107863	ARHGAP21	Non-disease gene
392	ENSG00000128805	ARHGAP22	Non-disease gene
393	ENSG00000225485	ARHGAP23	Non-disease gene
394	ENSG00000163219	ARHGAP25	Non-disease gene
395	ENSG00000088756	ARHGAP28	Non-disease gene
396	ENSG00000137962	ARHGAP29	Non-disease gene
397	ENSG00000186517	ARHGAP30	Non-disease gene
398	ENSG00000004777	ARHGAP33	Non-disease gene
399	ENSG00000147256	ARHGAP36	Non-disease gene
400	ENSG00000147799	ARHGAP39	Non-disease gene
401	ENSG00000165895	ARHGAP42	Non-disease gene
402	ENSG00000006740	ARHGAP44	Non-disease gene
403	ENSG00000100852	ARHGAP5	Non-disease gene
404	ENSG00000242173	ARHGDIG	Non-disease gene
405	ENSG00000076928	ARHGEF1	Non-disease gene
406	ENSG00000074964	ARHGEF10L	Non-disease gene
407	ENSG00000198844	ARHGEF15	Non-disease gene
408	ENSG00000130762	ARHGEF16	Non-disease gene
409	ENSG00000104880	ARHGEF18	Non-disease gene
410	ENSG00000142632	ARHGEF19	Non-disease gene
411	ENSG00000240771	ARHGEF25	Non-disease gene
412	ENSG00000114790	ARHGEF26	Non-disease gene
413	ENSG00000214694	ARHGEF33	Non-disease gene
414	ENSG00000183111	ARHGEF37	Non-disease gene
415	ENSG00000165801	ARHGEF40	Non-disease gene
416	ENSG00000189079	ARID2	Non-disease gene
417	ENSG00000179361	ARID3B	Non-disease gene
418	ENSG00000205143	ARID3C	Non-disease gene
419	ENSG00000196843	ARID5A	Non-disease gene
420	ENSG00000166233	ARIH1	Non-disease gene
421	ENSG00000177479	ARIH2	Non-disease gene
422	ENSG00000120805	ARL1	Non-disease gene
423	ENSG00000175414	ARL10	Non-disease gene
424	ENSG00000174225	ARL13A	Non-disease gene
425	ENSG00000179674	ARL14	Non-disease gene
426	ENSG00000214087	ARL16	Non-disease gene
427	ENSG00000213465	ARL2	Non-disease gene
428	ENSG00000102931	ARL2BP	Non-disease gene
429	ENSG00000188042	ARL4C	Non-disease gene
430	ENSG00000165997	ARL5B	Non-disease gene
431	ENSG00000141748	ARL5C	Non-disease gene
432	ENSG00000177917	ARL6IP6	Non-disease gene
433	ENSG00000143862	ARL8A	Non-disease gene
434	ENSG00000196503	ARL9	Non-disease gene
435	ENSG00000104442	ARMC1	Non-disease gene
436	ENSG00000170632	ARMC10	Non-disease gene
437	ENSG00000118690	ARMC2	Non-disease gene
438	ENSG00000165309	ARMC3	Non-disease gene
439	ENSG00000169126	ARMC4	Non-disease gene
440	ENSG00000140691	ARMC5	Non-disease gene
441	ENSG00000105676	ARMC6	Non-disease gene
442	ENSG00000125449	ARMC7	Non-disease gene
443	ENSG00000126947	ARMCX1	Non-disease gene
444	ENSG00000184867	ARMCX2	Non-disease gene
445	ENSG00000125962	ARMCX5	Non-disease gene
446	ENSG00000198960	ARMCX6	Non-disease gene
447	ENSG00000241553	ARPC4	Non-disease gene
448	ENSG00000172995	ARPP21	Non-disease gene
449	ENSG00000120500	ARR3	Non-disease gene
450	ENSG00000197070	ARRDC1	Non-disease gene
451	ENSG00000105643	ARRDC2	Non-disease gene
452	ENSG00000113369	ARRDC3	Non-disease gene
453	ENSG00000205784	ARRDC5	Non-disease gene
454	ENSG00000141337	ARSG	Non-disease gene
455	ENSG00000183876	ARSI	Non-disease gene
456	ENSG00000180801	ARSJ	Non-disease gene
457	ENSG00000164291	ARSK	Non-disease gene
458	ENSG00000156219	ART3	Non-disease gene
459	ENSG00000167311	ART5	Non-disease gene
460	ENSG00000151693	ASAP2	Non-disease gene
461	ENSG00000088280	ASAP3	Non-disease gene
462	ENSG00000065802	ASB1	Non-disease gene
463	ENSG00000165192	ASB11	Non-disease gene
464	ENSG00000198881	ASB12	Non-disease gene
465	ENSG00000196372	ASB13	Non-disease gene
466	ENSG00000239388	ASB14	Non-disease gene
467	ENSG00000146809	ASB15	Non-disease gene
468	ENSG00000161664	ASB16	Non-disease gene
469	ENSG00000154007	ASB17	Non-disease gene
470	ENSG00000182177	ASB18	Non-disease gene
471	ENSG00000100628	ASB2	Non-disease gene
472	ENSG00000115239	ASB3	Non-disease gene
473	ENSG00000005981	ASB4	Non-disease gene
474	ENSG00000164122	ASB5	Non-disease gene
475	ENSG00000148331	ASB6	Non-disease gene
476	ENSG00000183475	ASB7	Non-disease gene
477	ENSG00000177981	ASB8	Non-disease gene
478	ENSG00000138303	ASCC1	Non-disease gene
479	ENSG00000100325	ASCC2	Non-disease gene
480	ENSG00000176009	ASCL3	Non-disease gene
481	ENSG00000111875	ASF1A	Non-disease gene
482	ENSG00000105011	ASF1B	Non-disease gene
483	ENSG00000161944	ASGR2	Non-disease gene
484	ENSG00000204653	ASPDH	Non-disease gene
485	ENSG00000166183	ASPG	Non-disease gene
486	ENSG00000198363	ASPH	Non-disease gene
487	ENSG00000174939	ASPHD1	Non-disease gene
488	ENSG00000128203	ASPHD2	Non-disease gene
489	ENSG00000162174	ASRGL1	Non-disease gene
490	ENSG00000034533	ASTE1	Non-disease gene
491	ENSG00000188886	ASTL	Non-disease gene
492	ENSG00000152092	ASTN1	Non-disease gene
493	ENSG00000154438	ASZ1	Non-disease gene
494	ENSG00000138138	ATAD1	Non-disease gene
495	ENSG00000156802	ATAD2	Non-disease gene
496	ENSG00000107669	ATE1	Non-disease gene
497	ENSG00000166669	ATF7IP2	Non-disease gene
498	ENSG00000152348	ATG10	Non-disease gene
499	ENSG00000145782	ATG12	Non-disease gene
500	ENSG00000175224	ATG13	Non-disease gene
501	ENSG00000126775	ATG14	Non-disease gene
502	ENSG00000168010	ATG16L2	Non-disease gene
503	ENSG00000168397	ATG4B	Non-disease gene
504	ENSG00000125703	ATG4C	Non-disease gene
505	ENSG00000130734	ATG4D	Non-disease gene
506	ENSG00000142102	ATHL1	Non-disease gene
507	ENSG00000119787	ATL2	Non-disease gene
508	ENSG00000184743	ATL3	Non-disease gene
509	ENSG00000166454	ATMIN	Non-disease gene
510	ENSG00000168874	ATOH8	Non-disease gene
511	ENSG00000118322	ATP10B	Non-disease gene
512	ENSG00000068650	ATP11A	Non-disease gene
513	ENSG00000058063	ATP11B	Non-disease gene
514	ENSG00000075673	ATP12A	Non-disease gene
515	ENSG00000105726	ATP13A1	Non-disease gene
516	ENSG00000133657	ATP13A3	Non-disease gene
517	ENSG00000187527	ATP13A5	Non-disease gene
518	ENSG00000067842	ATP2B3	Non-disease gene
519	ENSG00000064270	ATP2C2	Non-disease gene
520	ENSG00000105675	ATP4A	Non-disease gene
521	ENSG00000186009	ATP4B	Non-disease gene
522	ENSG00000099624	ATP5D	Non-disease gene
523	ENSG00000159199	ATP5G1	Non-disease gene
524	ENSG00000125375	ATP5S	Non-disease gene
525	ENSG00000205464	ATP6AP1L	Non-disease gene
526	ENSG00000033627	ATP6V0A1	Non-disease gene
527	ENSG00000147614	ATP6V0D2	Non-disease gene
528	ENSG00000155097	ATP6V1C1	Non-disease gene
529	ENSG00000143882	ATP6V1C2	Non-disease gene
530	ENSG00000250565	ATP6V1E2	Non-disease gene
531	ENSG00000151418	ATP6V1G3	Non-disease gene
532	ENSG00000124406	ATP8A1	Non-disease gene
533	ENSG00000143515	ATP8B2	Non-disease gene
534	ENSG00000130270	ATP8B3	Non-disease gene
535	ENSG00000104043	ATP8B4	Non-disease gene
536	ENSG00000054793	ATP9A	Non-disease gene
537	ENSG00000166377	ATP9B	Non-disease gene
538	ENSG00000123472	ATPAF1	Non-disease gene
539	ENSG00000134146	ATPBD4	Non-disease gene
540	ENSG00000088812	ATRN	Non-disease gene
541	ENSG00000224470	ATXN1L	Non-disease gene
542	ENSG00000168488	ATXN2L	Non-disease gene
543	ENSG00000146776	ATXN7L1	Non-disease gene
544	ENSG00000162650	ATXN7L2	Non-disease gene
545	ENSG00000087152	ATXN7L3	Non-disease gene
546	ENSG00000105778	AVL9	Non-disease gene
547	ENSG00000204195	AWAT1	Non-disease gene
548	ENSG00000147160	AWAT2	Non-disease gene
549	ENSG00000141577	AZI1	Non-disease gene
550	ENSG00000162885	B3GALNT2	Non-disease gene
551	ENSG00000235863	B3GALT4	Non-disease gene
552	ENSG00000183778	B3GALT5	Non-disease gene
553	ENSG00000112309	B3GAT2	Non-disease gene
554	ENSG00000176383	B3GNT4	Non-disease gene
555	ENSG00000176597	B3GNT5	Non-disease gene
556	ENSG00000156966	B3GNT7	Non-disease gene
557	ENSG00000177191	B3GNT8	Non-disease gene
558	ENSG00000237172	B3GNT9	Non-disease gene
559	ENSG00000175711	B3GNTL1	Non-disease gene
560	ENSG00000139044	B4GALNT3	Non-disease gene
561	ENSG00000182272	B4GALNT4	Non-disease gene
562	ENSG00000117411	B4GALT2	Non-disease gene
563	ENSG00000121578	B4GALT4	Non-disease gene
564	ENSG00000140320	BAHD1	Non-disease gene
565	ENSG00000175866	BAIAP2	Non-disease gene
566	ENSG00000006453	BAIAP2L1	Non-disease gene
567	ENSG00000128298	BAIAP2L2	Non-disease gene
568	ENSG00000007516	BAIAP3	Non-disease gene
569	ENSG00000095739	BAMBI	Non-disease gene
570	ENSG00000143032	BARHL2	Non-disease gene
571	ENSG00000168062	BATF2	Non-disease gene
572	ENSG00000129151	BBOX1	Non-disease gene
573	ENSG00000075790	BCAP29	Non-disease gene
574	ENSG00000107949	BCCIP	Non-disease gene
575	ENSG00000186666	BCDIN3D	Non-disease gene
576	ENSG00000103507	BCKDK	Non-disease gene
577	ENSG00000188761	BCL2L15	Non-disease gene
578	ENSG00000161940	BCL6B	Non-disease gene
579	ENSG00000099385	BCL7C	Non-disease gene
580	ENSG00000197580	BCO2	Non-disease gene
581	ENSG00000161267	BDH1	Non-disease gene
582	ENSG00000183092	BEGAIN	Non-disease gene
583	ENSG00000178409	BEND3	Non-disease gene
584	ENSG00000162373	BEND5	Non-disease gene
585	ENSG00000151917	BEND6	Non-disease gene
586	ENSG00000165626	BEND7	Non-disease gene
587	ENSG00000039987	BEST2	Non-disease gene
588	ENSG00000127325	BEST3	Non-disease gene
589	ENSG00000173626	BET3L	Non-disease gene
590	ENSG00000103429	BFAR	Non-disease gene
591	ENSG00000180535	BHLHA15	Non-disease gene
592	ENSG00000198908	BHLHB9	Non-disease gene
593	ENSG00000180828	BHLHE22	Non-disease gene
594	ENSG00000125533	BHLHE23	Non-disease gene
595	ENSG00000132840	BHMT2	Non-disease gene
596	ENSG00000151746	BICD1	Non-disease gene
597	ENSG00000185963	BICD2	Non-disease gene
598	ENSG00000110934	BIN2	Non-disease gene
599	ENSG00000147439	BIN3	Non-disease gene
600	ENSG00000163098	BIRC8	Non-disease gene
601	ENSG00000134897	BIVM	Non-disease gene
602	ENSG00000135441	BLOC1S1	Non-disease gene
603	ENSG00000090013	BLVRB	Non-disease gene
604	ENSG00000164619	BMPER	Non-disease gene
605	ENSG00000113734	BNIP1	Non-disease gene
606	ENSG00000163141	BNIPL	Non-disease gene
607	ENSG00000145919	BOD1	Non-disease gene
608	ENSG00000178096	BOLA1	Non-disease gene
609	ENSG00000163170	BOLA3	Non-disease gene
610	ENSG00000137274	BPHL	Non-disease gene
611	ENSG00000078898	BPIL1	Non-disease gene
612	ENSG00000184459	BPIL2	Non-disease gene
613	ENSG00000167104	BPIL3	Non-disease gene
614	ENSG00000162813	BPNT1	Non-disease gene
615	ENSG00000185515	BRCC3	Non-disease gene
616	ENSG00000028310	BRD9	Non-disease gene
617	ENSG00000164713	BRI3	Non-disease gene
618	ENSG00000184992	BRI3BP	Non-disease gene
619	ENSG00000113460	BRIX1	Non-disease gene
620	ENSG00000100916	BRMS1L	Non-disease gene
621	ENSG00000096070	BRPF3	Non-disease gene
622	ENSG00000160469	BRSK1	Non-disease gene
623	ENSG00000188334	BSPH1	Non-disease gene
624	ENSG00000119411	BSPRY	Non-disease gene
625	ENSG00000188909	BSX	Non-disease gene
626	ENSG00000148925	BTBD10	Non-disease gene
627	ENSG00000151136	BTBD11	Non-disease gene
628	ENSG00000138152	BTBD16	Non-disease gene
629	ENSG00000204347	BTBD17	Non-disease gene
630	ENSG00000133243	BTBD2	Non-disease gene
631	ENSG00000184887	BTBD6	Non-disease gene
632	ENSG00000011114	BTBD7	Non-disease gene
633	ENSG00000189195	BTBD8	Non-disease gene
634	ENSG00000134717	BTF3L4	Non-disease gene
635	ENSG00000137707	BTG4	Non-disease gene
636	ENSG00000186265	BTLA	Non-disease gene
637	ENSG00000165810	BTNL9	Non-disease gene
638	ENSG00000137656	BUD13	Non-disease gene
639	ENSG00000112276	BVES	Non-disease gene
640	ENSG00000233198	BX255925.2	Non-disease gene
641	ENSG00000215699	BX511012.2	Non-disease gene
642	ENSG00000112578	BYSL	Non-disease gene
643	ENSG00000005379	BZRAP1	Non-disease gene
644	ENSG00000165507	C10orf10	Non-disease gene
645	ENSG00000183346	C10orf107	Non-disease gene
646	ENSG00000165813	C10orf118	Non-disease gene
647	ENSG00000197771	C10orf119	Non-disease gene
648	ENSG00000183559	C10orf120	Non-disease gene
649	ENSG00000175018	C10orf122	Non-disease gene
650	ENSG00000148803	C10orf125	Non-disease gene
651	ENSG00000107938	C10orf137	Non-disease gene
652	ENSG00000180592	C10orf140	Non-disease gene
653	ENSG00000166272	C10orf26	Non-disease gene
654	ENSG00000166220	C10orf27	Non-disease gene
655	ENSG00000166024	C10orf28	Non-disease gene
656	ENSG00000171224	C10orf35	Non-disease gene
657	ENSG00000151893	C10orf46	Non-disease gene
658	ENSG00000148426	C10orf47	Non-disease gene
659	ENSG00000178645	C10orf53	Non-disease gene
660	ENSG00000107738	C10orf54	Non-disease gene
661	ENSG00000122378	C10orf57	Non-disease gene
662	ENSG00000179133	C10orf67	Non-disease gene
663	ENSG00000177354	C10orf71	Non-disease gene
664	ENSG00000165633	C10orf72	Non-disease gene
665	ENSG00000120029	C10orf76	Non-disease gene
666	ENSG00000156384	C10orf78	Non-disease gene
667	ENSG00000197748	C10orf79	Non-disease gene
668	ENSG00000148735	C10orf81	Non-disease gene
669	ENSG00000165863	C10orf82	Non-disease gene
670	ENSG00000165669	C10orf84	Non-disease gene
671	ENSG00000119965	C10orf88	Non-disease gene
672	ENSG00000154493	C10orf90	Non-disease gene
673	ENSG00000182645	C10orf96	Non-disease gene
674	ENSG00000137720	C11orf1	Non-disease gene
675	ENSG00000176029	C11orf16	Non-disease gene
676	ENSG00000219435	C11orf20	Non-disease gene
677	ENSG00000171067	C11orf24	Non-disease gene
678	ENSG00000188771	C11orf34	Non-disease gene
679	ENSG00000185522	C11orf35	Non-disease gene
680	ENSG00000110427	C11orf41	Non-disease gene
681	ENSG00000180878	C11orf42	Non-disease gene
682	ENSG00000149179	C11orf49	Non-disease gene
683	ENSG00000110200	C11orf51	Non-disease gene
684	ENSG00000149300	C11orf52	Non-disease gene
685	ENSG00000150750	C11orf53	Non-disease gene
686	ENSG00000182919	C11orf54	Non-disease gene
687	ENSG00000150776	C11orf57	Non-disease gene
688	ENSG00000149357	C11orf59	Non-disease gene
689	ENSG00000120458	C11orf61	Non-disease gene
690	ENSG00000109944	C11orf63	Non-disease gene
691	ENSG00000162148	C11orf66	Non-disease gene
692	ENSG00000087884	C11orf67	Non-disease gene
693	ENSG00000180425	C11orf71	Non-disease gene
694	ENSG00000149196	C11orf73	Non-disease gene
695	ENSG00000166352	C11orf74	Non-disease gene
696	ENSG00000173715	C11orf80	Non-disease gene
697	ENSG00000165490	C11orf82	Non-disease gene
698	ENSG00000168005	C11orf84	Non-disease gene
699	ENSG00000168070	C11orf85	Non-disease gene
700	ENSG00000183644	C11orf88	Non-disease gene
701	ENSG00000184682	C11orf89	Non-disease gene
702	ENSG00000124920	C11orf9	Non-disease gene
703	ENSG00000214376	C11orf90	Non-disease gene
704	ENSG00000205177	C11orf91	Non-disease gene
705	ENSG00000188070	C11orf95	Non-disease gene
706	ENSG00000064102	C12orf11	Non-disease gene
707	ENSG00000197651	C12orf12	Non-disease gene
708	ENSG00000151135	C12orf23	Non-disease gene
709	ENSG00000204856	C12orf24	Non-disease gene
710	ENSG00000127720	C12orf26	Non-disease gene
711	ENSG00000166268	C12orf28	Non-disease gene
712	ENSG00000133641	C12orf29	Non-disease gene
713	ENSG00000139438	C12orf34	Non-disease gene
714	ENSG00000134548	C12orf39	Non-disease gene
715	ENSG00000180116	C12orf40	Non-disease gene
716	ENSG00000179088	C12orf42	Non-disease gene
717	ENSG00000157895	C12orf43	Non-disease gene
718	ENSG00000123395	C12orf44	Non-disease gene
719	ENSG00000151131	C12orf45	Non-disease gene
720	ENSG00000185480	C12orf48	Non-disease gene
721	ENSG00000111412	C12orf49	Non-disease gene
722	ENSG00000078237	C12orf5	Non-disease gene
723	ENSG00000165805	C12orf50	Non-disease gene
724	ENSG00000139405	C12orf52	Non-disease gene
725	ENSG00000139200	C12orf53	Non-disease gene
726	ENSG00000165990	C12orf55	Non-disease gene
727	ENSG00000185306	C12orf56	Non-disease gene
728	ENSG00000165685	C12orf59	Non-disease gene
729	ENSG00000182993	C12orf60	Non-disease gene
730	ENSG00000188596	C12orf63	Non-disease gene
731	ENSG00000174206	C12orf66	Non-disease gene
732	ENSG00000177875	C12orf68	Non-disease gene
733	ENSG00000179256	C12orf69	Non-disease gene
734	ENSG00000165935	C12orf70	Non-disease gene
735	ENSG00000214700	C12orf71	Non-disease gene
736	ENSG00000139160	C12orf72	Non-disease gene
737	ENSG00000102445	C13orf18	Non-disease gene
738	ENSG00000120685	C13orf23	Non-disease gene
739	ENSG00000175664	C13orf26	Non-disease gene
740	ENSG00000151287	C13orf27	Non-disease gene
741	ENSG00000153498	C13orf28	Non-disease gene
742	ENSG00000179813	C13orf30	Non-disease gene
743	ENSG00000102802	C13orf33	Non-disease gene
744	ENSG00000136122	C13orf34	Non-disease gene
745	ENSG00000180440	C13orf36	Non-disease gene
746	ENSG00000242715	C13orf38	Non-disease gene
747	ENSG00000139780	C13orf39	Non-disease gene
748	ENSG00000133935	C14orf1	Non-disease gene
749	ENSG00000119720	C14orf102	Non-disease gene
750	ENSG00000100557	C14orf105	Non-disease gene
751	ENSG00000129534	C14orf106	Non-disease gene
752	ENSG00000133980	C14orf115	Non-disease gene
753	ENSG00000089916	C14orf118	Non-disease gene
754	ENSG00000179933	C14orf119	Non-disease gene
755	ENSG00000129480	C14orf126	Non-disease gene
756	ENSG00000100744	C14orf129	Non-disease gene
757	ENSG00000126773	C14orf135	Non-disease gene
758	ENSG00000100483	C14orf138	Non-disease gene
759	ENSG00000140025	C14orf143	Non-disease gene
760	ENSG00000100629	C14orf145	Non-disease gene
761	ENSG00000165555	C14orf148	Non-disease gene
762	ENSG00000126790	C14orf149	Non-disease gene
763	ENSG00000126214	C14orf153	Non-disease gene
764	ENSG00000215277	C14orf164	Non-disease gene
765	ENSG00000100565	C14orf166B	Non-disease gene
766	ENSG00000232070	C14orf176	Non-disease gene
767	ENSG00000184601	C14orf180	Non-disease gene
768	ENSG00000139971	C14orf37	Non-disease gene
769	ENSG00000151838	C14orf38	Non-disease gene
770	ENSG00000179008	C14orf39	Non-disease gene
771	ENSG00000119669	C14orf4	Non-disease gene
772	ENSG00000156030	C14orf43	Non-disease gene
773	ENSG00000119636	C14orf45	Non-disease gene
774	ENSG00000176438	C14orf49	Non-disease gene
775	ENSG00000165807	C14orf50	Non-disease gene
776	ENSG00000205436	C14orf73	Non-disease gene
777	ENSG00000140104	C14orf79	Non-disease gene
778	ENSG00000185347	C14orf80	Non-disease gene
779	ENSG00000100802	C14orf93	Non-disease gene
780	ENSG00000178761	C15orf17	Non-disease gene
781	ENSG00000128944	C15orf23	Non-disease gene
782	ENSG00000156206	C15orf26	Non-disease gene
783	ENSG00000169758	C15orf27	Non-disease gene
784	ENSG00000134152	C15orf29	Non-disease gene
785	ENSG00000166262	C15orf33	Non-disease gene
786	ENSG00000167173	C15orf39	Non-disease gene
787	ENSG00000169609	C15orf40	Non-disease gene
788	ENSG00000186073	C15orf41	Non-disease gene
789	ENSG00000140534	C15orf42	Non-disease gene
790	ENSG00000167014	C15orf43	Non-disease gene
791	ENSG00000138614	C15orf44	Non-disease gene
792	ENSG00000188549	C15orf52	Non-disease gene
793	ENSG00000128891	C15orf57	Non-disease gene
794	ENSG00000183208	C15orf58	Non-disease gene
795	ENSG00000205363	C15orf59	Non-disease gene
796	ENSG00000183324	C15orf60	Non-disease gene
797	ENSG00000103148	C16orf35	Non-disease gene
798	ENSG00000007520	C16orf42	Non-disease gene
799	ENSG00000166780	C16orf45	Non-disease gene
800	ENSG00000166455	C16orf46	Non-disease gene
801	ENSG00000124074	C16orf48	Non-disease gene
802	ENSG00000089486	C16orf5	Non-disease gene
803	ENSG00000185928	C16orf53	Non-disease gene
804	ENSG00000185905	C16orf54	Non-disease gene
805	ENSG00000167523	C16orf55	Non-disease gene
806	ENSG00000140688	C16orf58	Non-disease gene
807	ENSG00000162062	C16orf59	Non-disease gene
808	ENSG00000103544	C16orf62	Non-disease gene
809	ENSG00000133393	C16orf63	Non-disease gene
810	ENSG00000067365	C16orf68	Non-disease gene
811	ENSG00000075399	C16orf7	Non-disease gene
812	ENSG00000125149	C16orf70	Non-disease gene
813	ENSG00000166246	C16orf71	Non-disease gene
814	ENSG00000182831	C16orf72	Non-disease gene
815	ENSG00000162039	C16orf73	Non-disease gene
816	ENSG00000175643	C16orf75	Non-disease gene
817	ENSG00000166152	C16orf78	Non-disease gene
818	ENSG00000182685	C16orf79	Non-disease gene
819	ENSG00000159761	C16orf86	Non-disease gene
820	ENSG00000155330	C16orf87	Non-disease gene
821	ENSG00000103550	C16orf88	Non-disease gene
822	ENSG00000153446	C16orf89	Non-disease gene
823	ENSG00000167194	C16orf92	Non-disease gene
824	ENSG00000196118	C16orf93	Non-disease gene
825	ENSG00000181396	C17orf101	Non-disease gene
826	ENSG00000180336	C17orf104	Non-disease gene
827	ENSG00000231256	C17orf105	Non-disease gene
828	ENSG00000108504	C17orf106	Non-disease gene
829	ENSG00000167861	C17orf28	Non-disease gene
830	ENSG00000141034	C17orf39	Non-disease gene
831	ENSG00000184361	C17orf46	Non-disease gene
832	ENSG00000181013	C17orf47	Non-disease gene
833	ENSG00000170222	C17orf48	Non-disease gene
834	ENSG00000161939	C17orf49	Non-disease gene
835	ENSG00000154768	C17orf50	Non-disease gene
836	ENSG00000167302	C17orf56	Non-disease gene
837	ENSG00000196544	C17orf59	Non-disease gene
838	ENSG00000205544	C17orf61	Non-disease gene
839	ENSG00000173065	C17orf63	Non-disease gene
840	ENSG00000141371	C17orf64	Non-disease gene
841	ENSG00000172653	C17orf66	Non-disease gene
842	ENSG00000214226	C17orf67	Non-disease gene
843	ENSG00000185504	C17orf70	Non-disease gene
844	ENSG00000224383	C17orf72	Non-disease gene
845	ENSG00000184560	C17orf74	Non-disease gene
846	ENSG00000181350	C17orf76	Non-disease gene
847	ENSG00000167230	C17orf78	Non-disease gene
848	ENSG00000141219	C17orf80	Non-disease gene
849	ENSG00000170291	C17orf81	Non-disease gene
850	ENSG00000074356	C17orf85	Non-disease gene
851	ENSG00000161929	C17orf87	Non-disease gene
852	ENSG00000204237	C17orf90	Non-disease gene
853	ENSG00000181038	C17orf95	Non-disease gene
854	ENSG00000179294	C17orf96	Non-disease gene
855	ENSG00000187624	C17orf97	Non-disease gene
856	ENSG00000214556	C17orf98	Non-disease gene
857	ENSG00000187997	C17orf99	Non-disease gene
858	ENSG00000134779	C18orf10	Non-disease gene
859	ENSG00000177150	C18orf19	Non-disease gene
860	ENSG00000141428	C18orf21	Non-disease gene
861	ENSG00000101546	C18orf22	Non-disease gene
862	ENSG00000166960	C18orf34	Non-disease gene
863	ENSG00000134490	C18orf45	Non-disease gene
864	ENSG00000166845	C18orf54	Non-disease gene
865	ENSG00000075336	C18orf55	Non-disease gene
866	ENSG00000177025	C19orf18	Non-disease gene
867	ENSG00000141933	C19orf20	Non-disease gene
868	ENSG00000099812	C19orf21	Non-disease gene
869	ENSG00000228300	C19orf24	Non-disease gene
870	ENSG00000119559	C19orf25	Non-disease gene
871	ENSG00000161091	C19orf28	Non-disease gene
872	ENSG00000105298	C19orf29	Non-disease gene
873	ENSG00000099840	C19orf36	Non-disease gene
874	ENSG00000214212	C19orf38	Non-disease gene
875	ENSG00000173928	C19orf39	Non-disease gene
876	ENSG00000131944	C19orf40	Non-disease gene
877	ENSG00000161652	C19orf41	Non-disease gene
878	ENSG00000123144	C19orf43	Non-disease gene
879	ENSG00000105072	C19orf44	Non-disease gene
880	ENSG00000198723	C19orf45	Non-disease gene
881	ENSG00000160392	C19orf47	Non-disease gene
882	ENSG00000142444	C19orf52	Non-disease gene
883	ENSG00000167595	C19orf55	Non-disease gene
884	ENSG00000132016	C19orf57	Non-disease gene
885	ENSG00000183019	C19orf59	Non-disease gene
886	ENSG00000182087	C19orf6	Non-disease gene
887	ENSG00000006015	C19orf60	Non-disease gene
888	ENSG00000105771	C19orf61	Non-disease gene
889	ENSG00000105393	C19orf62	Non-disease gene
890	ENSG00000161671	C19orf63	Non-disease gene
891	ENSG00000130813	C19orf66	Non-disease gene
892	ENSG00000188032	C19orf67	Non-disease gene
893	ENSG00000185453	C19orf68	Non-disease gene
894	ENSG00000204978	C19orf69	Non-disease gene
895	ENSG00000174917	C19orf70	Non-disease gene
896	ENSG00000183397	C19orf71	Non-disease gene
897	ENSG00000179213	C19orf75	Non-disease gene
898	ENSG00000095932	C19orf77	Non-disease gene
899	ENSG00000173728	C1orf100	Non-disease gene
900	ENSG00000179397	C1orf101	Non-disease gene
901	ENSG00000121931	C1orf103	Non-disease gene
902	ENSG00000180999	C1orf105	Non-disease gene
903	ENSG00000163362	C1orf106	Non-disease gene
904	ENSG00000117597	C1orf107	Non-disease gene
905	ENSG00000185860	C1orf110	Non-disease gene
906	ENSG00000171722	C1orf111	Non-disease gene
907	ENSG00000000460	C1orf112	Non-disease gene
908	ENSG00000214193	C1orf113	Non-disease gene
909	ENSG00000117477	C1orf114	Non-disease gene
910	ENSG00000182795	C1orf116	Non-disease gene
911	ENSG00000162384	C1orf123	Non-disease gene
912	ENSG00000010072	C1orf124	Non-disease gene
913	ENSG00000162779	C1orf125	Non-disease gene
914	ENSG00000057757	C1orf128	Non-disease gene
915	ENSG00000117501	C1orf129	Non-disease gene
916	ENSG00000184454	C1orf130	Non-disease gene
917	ENSG00000143633	C1orf131	Non-disease gene
918	ENSG00000127423	C1orf135	Non-disease gene
919	ENSG00000157060	C1orf14	Non-disease gene
920	ENSG00000203963	C1orf141	Non-disease gene
921	ENSG00000055070	C1orf144	Non-disease gene
922	ENSG00000203910	C1orf146	Non-disease gene
923	ENSG00000171806	C1orf156	Non-disease gene
924	ENSG00000157330	C1orf158	Non-disease gene
925	ENSG00000131591	C1orf159	Non-disease gene
926	ENSG00000173212	C1orf161	Non-disease gene
927	ENSG00000143110	C1orf162	Non-disease gene
928	ENSG00000162377	C1orf163	Non-disease gene
929	ENSG00000187889	C1orf168	Non-disease gene
930	ENSG00000187642	C1orf170	Non-disease gene
931	ENSG00000175707	C1orf172	Non-disease gene
932	ENSG00000178965	C1orf173	Non-disease gene
933	ENSG00000184313	C1orf175	Non-disease gene
934	ENSG00000162398	C1orf177	Non-disease gene
935	ENSG00000163467	C1orf182	Non-disease gene
936	ENSG00000197852	C1orf183	Non-disease gene
937	ENSG00000204006	C1orf185	Non-disease gene
938	ENSG00000162490	C1orf187	Non-disease gene
939	ENSG00000163263	C1orf189	Non-disease gene
940	ENSG00000171357	C1orf190	Non-disease gene
941	ENSG00000188931	C1orf192	Non-disease gene
942	ENSG00000179902	C1orf194	Non-disease gene
943	ENSG00000119280	C1orf198	Non-disease gene
944	ENSG00000001460	C1orf201	Non-disease gene
945	ENSG00000116667	C1orf21	Non-disease gene
946	ENSG00000253313	C1orf210	Non-disease gene
947	ENSG00000142609	C1orf222	Non-disease gene
948	ENSG00000198520	C1orf228	Non-disease gene
949	ENSG00000178796	C1orf230	Non-disease gene
950	ENSG00000121486	C1orf25	Non-disease gene
951	ENSG00000116668	C1orf26	Non-disease gene
952	ENSG00000157181	C1orf27	Non-disease gene
953	ENSG00000168275	C1orf31	Non-disease gene
954	ENSG00000143793	C1orf35	Non-disease gene
955	ENSG00000143612	C1orf43	Non-disease gene
956	ENSG00000240021	C1orf49	Non-disease gene
957	ENSG00000159208	C1orf51	Non-disease gene
958	ENSG00000162642	C1orf52	Non-disease gene
959	ENSG00000203724	C1orf53	Non-disease gene
960	ENSG00000118292	C1orf54	Non-disease gene
961	ENSG00000143751	C1orf55	Non-disease gene
962	ENSG00000143443	C1orf56	Non-disease gene
963	ENSG00000135778	C1orf57	Non-disease gene
964	ENSG00000162819	C1orf58	Non-disease gene
965	ENSG00000162639	C1orf59	Non-disease gene
966	ENSG00000183888	C1orf64	Non-disease gene
967	ENSG00000178395	C1orf65	Non-disease gene
968	ENSG00000143303	C1orf66	Non-disease gene
969	ENSG00000181873	C1orf69	Non-disease gene
970	ENSG00000162757	C1orf74	Non-disease gene
971	ENSG00000116205	C1orf83	Non-disease gene
972	ENSG00000198715	C1orf85	Non-disease gene
973	ENSG00000162585	C1orf86	Non-disease gene
974	ENSG00000162598	C1orf87	Non-disease gene
975	ENSG00000173947	C1orf88	Non-disease gene
976	ENSG00000132881	C1orf89	Non-disease gene
977	ENSG00000094975	C1orf9	Non-disease gene
978	ENSG00000160055	C1orf91	Non-disease gene
979	ENSG00000160838	C1orf92	Non-disease gene
980	ENSG00000157870	C1orf93	Non-disease gene
981	ENSG00000142698	C1orf94	Non-disease gene
982	ENSG00000203685	C1orf95	Non-disease gene
983	ENSG00000154429	C1orf96	Non-disease gene
984	ENSG00000131094	C1QL1	Non-disease gene
985	ENSG00000144119	C1QL2	Non-disease gene
986	ENSG00000165985	C1QL3	Non-disease gene
987	ENSG00000186897	C1QL4	Non-disease gene
988	ENSG00000145861	C1QTNF2	Non-disease gene
989	ENSG00000172247	C1QTNF4	Non-disease gene
990	ENSG00000133466	C1QTNF6	Non-disease gene
991	ENSG00000163145	C1QTNF7	Non-disease gene
992	ENSG00000139178	C1RL	Non-disease gene
993	ENSG00000124191	C20orf100	Non-disease gene
994	ENSG00000125869	C20orf103	Non-disease gene
995	ENSG00000124098	C20orf108	Non-disease gene
996	ENSG00000101193	C20orf11	Non-disease gene
997	ENSG00000197183	C20orf112	Non-disease gene
998	ENSG00000125999	C20orf114	Non-disease gene
999	ENSG00000149639	C20orf117	Non-disease gene
1000	ENSG00000101342	C20orf118	Non-disease gene
1001	ENSG00000089091	C20orf12	Non-disease gene
1002	ENSG00000149635	C20orf123	Non-disease gene
1003	ENSG00000182584	C20orf134	Non-disease gene
1004	ENSG00000183260	C20orf135	Non-disease gene
1005	ENSG00000241690	C20orf141	Non-disease gene
1006	ENSG00000149609	C20orf144	Non-disease gene
1007	ENSG00000130701	C20orf151	Non-disease gene
1008	ENSG00000149646	C20orf152	Non-disease gene
1009	ENSG00000101331	C20orf160	Non-disease gene
1010	ENSG00000149634	C20orf165	Non-disease gene
1011	ENSG00000125975	C20orf173	Non-disease gene
1012	ENSG00000196227	C20orf177	Non-disease gene
1013	ENSG00000186190	C20orf185	Non-disease gene
1014	ENSG00000186191	C20orf186	Non-disease gene
1015	ENSG00000088854	C20orf194	Non-disease gene
1016	ENSG00000125531	C20orf195	Non-disease gene
1017	ENSG00000171984	C20orf196	Non-disease gene
1018	ENSG00000101189	C20orf20	Non-disease gene
1019	ENSG00000171695	C20orf201	Non-disease gene
1020	ENSG00000089101	C20orf26	Non-disease gene
1021	ENSG00000125843	C20orf29	Non-disease gene
1022	ENSG00000089063	C20orf30	Non-disease gene
1023	ENSG00000131043	C20orf4	Non-disease gene
1024	ENSG00000125895	C20orf46	Non-disease gene
1025	ENSG00000131050	C20orf70	Non-disease gene
1026	ENSG00000131059	C20orf71	Non-disease gene
1027	ENSG00000125871	C20orf72	Non-disease gene
1028	ENSG00000132631	C20orf79	Non-disease gene
1029	ENSG00000101230	C20orf82	Non-disease gene
1030	ENSG00000124237	C20orf85	Non-disease gene
1031	ENSG00000149346	C20orf94	Non-disease gene
1032	ENSG00000124143	C20orf95	Non-disease gene
1033	ENSG00000196476	C20orf96	Non-disease gene
1034	ENSG00000160226	C21orf2	Non-disease gene
1035	ENSG00000175894	C21orf29	Non-disease gene
1036	ENSG00000159055	C21orf45	Non-disease gene
1037	ENSG00000160284	C21orf56	Non-disease gene
1038	ENSG00000182362	C21orf57	Non-disease gene
1039	ENSG00000160298	C21orf58	Non-disease gene
1040	ENSG00000205929	C21orf62	Non-disease gene
1041	ENSG00000166979	C21orf63	Non-disease gene
1042	ENSG00000156265	C21orf7	Non-disease gene
1043	ENSG00000160256	C21orf70	Non-disease gene
1044	ENSG00000138867	C22orf13	Non-disease gene
1045	ENSG00000169314	C22orf15	Non-disease gene
1046	ENSG00000128346	C22orf23	Non-disease gene
1047	ENSG00000183597	C22orf25	Non-disease gene
1048	ENSG00000215012	C22orf29	Non-disease gene
1049	ENSG00000183172	C22orf32	Non-disease gene
1050	ENSG00000185264	C22orf33	Non-disease gene
1051	ENSG00000178026	C22orf36	Non-disease gene
1052	ENSG00000242259	C22orf39	Non-disease gene
1053	ENSG00000157617	C2CD2	Non-disease gene
1054	ENSG00000172375	C2CD2L	Non-disease gene
1055	ENSG00000183186	C2CD4C	Non-disease gene
1056	ENSG00000213699	C2orf18	Non-disease gene
1057	ENSG00000115649	C2orf24	Non-disease gene
1058	ENSG00000158435	C2orf29	Non-disease gene
1059	ENSG00000157856	C2orf39	Non-disease gene
1060	ENSG00000119147	C2orf40	Non-disease gene
1061	ENSG00000118961	C2orf43	Non-disease gene
1062	ENSG00000163026	C2orf44	Non-disease gene
1063	ENSG00000135974	C2orf49	Non-disease gene
1064	ENSG00000150873	C2orf50	Non-disease gene
1065	ENSG00000172073	C2orf51	Non-disease gene
1066	ENSG00000186143	C2orf53	Non-disease gene
1067	ENSG00000172478	C2orf54	Non-disease gene
1068	ENSG00000196872	C2orf55	Non-disease gene
1069	ENSG00000177673	C2orf57	Non-disease gene
1070	ENSG00000162971	C2orf60	Non-disease gene
1071	ENSG00000239605	C2orf61	Non-disease gene
1072	ENSG00000158428	C2orf62	Non-disease gene
1073	ENSG00000162994	C2orf63	Non-disease gene
1074	ENSG00000159374	C2orf65	Non-disease gene
1075	ENSG00000144445	C2orf67	Non-disease gene
1076	ENSG00000168887	C2orf68	Non-disease gene
1077	ENSG00000178074	C2orf69	Non-disease gene
1078	ENSG00000135617	C2orf7	Non-disease gene
1079	ENSG00000173557	C2orf70	Non-disease gene
1080	ENSG00000204128	C2orf72	Non-disease gene
1081	ENSG00000177994	C2orf73	Non-disease gene
1082	ENSG00000237651	C2orf74	Non-disease gene
1083	ENSG00000186132	C2orf76	Non-disease gene
1084	ENSG00000154479	C2orf77	Non-disease gene
1085	ENSG00000184924	C2orf79	Non-disease gene
1086	ENSG00000188674	C2orf80	Non-disease gene
1087	ENSG00000159239	C2orf81	Non-disease gene
1088	ENSG00000219626	C2orf84	Non-disease gene
1089	ENSG00000113845	C3orf1	Non-disease gene
1090	ENSG00000183833	C3orf15	Non-disease gene
1091	ENSG00000206199	C3orf16	Non-disease gene
1092	ENSG00000163608	C3orf17	Non-disease gene
1093	ENSG00000088543	C3orf18	Non-disease gene
1094	ENSG00000154781	C3orf19	Non-disease gene
1095	ENSG00000131379	C3orf20	Non-disease gene
1096	ENSG00000173950	C3orf21	Non-disease gene
1097	ENSG00000180697	C3orf22	Non-disease gene
1098	ENSG00000179152	C3orf23	Non-disease gene
1099	ENSG00000163705	C3orf24	Non-disease gene
1100	ENSG00000184220	C3orf26	Non-disease gene
1101	ENSG00000144559	C3orf31	Non-disease gene
1102	ENSG00000125046	C3orf32	Non-disease gene
1103	ENSG00000174928	C3orf33	Non-disease gene
1104	ENSG00000174007	C3orf34	Non-disease gene
1105	ENSG00000183624	C3orf37	Non-disease gene
1106	ENSG00000179021	C3orf38	Non-disease gene
1107	ENSG00000144647	C3orf39	Non-disease gene
1108	ENSG00000214097	C3orf43	Non-disease gene
1109	ENSG00000179564	C3orf45	Non-disease gene
1110	ENSG00000183977	C3orf48	Non-disease gene
1111	ENSG00000114529	C3orf52	Non-disease gene
1112	ENSG00000185614	C3orf54	Non-disease gene
1113	ENSG00000181744	C3orf58	Non-disease gene
1114	ENSG00000180611	C3orf59	Non-disease gene
1115	ENSG00000188315	C3orf62	Non-disease gene
1116	ENSG00000163378	C3orf64	Non-disease gene
1117	ENSG00000163689	C3orf67	Non-disease gene
1118	ENSG00000187068	C3orf70	Non-disease gene
1119	ENSG00000163832	C3orf75	Non-disease gene
1120	ENSG00000084092	C4orf14	Non-disease gene
1121	ENSG00000138813	C4orf17	Non-disease gene
1122	ENSG00000164125	C4orf18	Non-disease gene
1123	ENSG00000154274	C4orf19	Non-disease gene
1124	ENSG00000197826	C4orf22	Non-disease gene
1125	ENSG00000155275	C4orf23	Non-disease gene
1126	ENSG00000164074	C4orf29	Non-disease gene
1127	ENSG00000164096	C4ORF3	Non-disease gene
1128	ENSG00000173376	C4orf31	Non-disease gene
1129	ENSG00000174749	C4orf32	Non-disease gene
1130	ENSG00000151470	C4orf33	Non-disease gene
1131	ENSG00000145309	C4orf35	Non-disease gene
1132	ENSG00000163633	C4orf36	Non-disease gene
1133	ENSG00000163116	C4orf37	Non-disease gene
1134	ENSG00000187533	C4orf40	Non-disease gene
1135	ENSG00000168538	C4orf41	Non-disease gene
1136	ENSG00000188981	C4orf44	Non-disease gene
1137	ENSG00000205208	C4orf46	Non-disease gene
1138	ENSG00000205129	C4orf47	Non-disease gene
1139	ENSG00000137463	C4orf49	Non-disease gene
1140	ENSG00000181215	C4orf50	Non-disease gene
1141	ENSG00000237136	C4orf51	Non-disease gene
1142	ENSG00000125386	C4orf8	Non-disease gene
1143	ENSG00000134986	C5orf13	Non-disease gene
1144	ENSG00000082213	C5orf22	Non-disease gene
1145	ENSG00000181904	C5orf24	Non-disease gene
1146	ENSG00000170085	C5orf25	Non-disease gene
1147	ENSG00000151881	C5orf28	Non-disease gene
1148	ENSG00000181751	C5orf30	Non-disease gene
1149	ENSG00000152620	C5orf33	Non-disease gene
1150	ENSG00000172244	C5orf34	Non-disease gene
1151	ENSG00000185261	C5orf36	Non-disease gene
1152	ENSG00000152359	C5orf37	Non-disease gene
1153	ENSG00000172568	C5orf40	Non-disease gene
1154	ENSG00000164463	C5orf41	Non-disease gene
1155	ENSG00000113597	C5orf44	Non-disease gene
1156	ENSG00000161010	C5orf45	Non-disease gene
1157	ENSG00000185056	C5orf47	Non-disease gene
1158	ENSG00000196900	C5orf48	Non-disease gene
1159	ENSG00000215217	C5orf49	Non-disease gene
1160	ENSG00000185662	C5orf50	Non-disease gene
1161	ENSG00000205765	C5orf51	Non-disease gene
1162	ENSG00000187658	C5orf52	Non-disease gene
1163	ENSG00000118492	C6orf103	Non-disease gene
1164	ENSG00000196821	C6orf106	Non-disease gene
1165	ENSG00000112667	C6orf108	Non-disease gene
1166	ENSG00000112539	C6orf118	Non-disease gene
1167	ENSG00000185127	C6orf120	Non-disease gene
1168	ENSG00000137288	C6orf125	Non-disease gene
1169	ENSG00000124596	C6orf130	Non-disease gene
1170	ENSG00000188112	C6orf132	Non-disease gene
1171	ENSG00000146147	C6orf142	Non-disease gene
1172	ENSG00000168994	C6orf145	Non-disease gene
1173	ENSG00000164430	C6orf150	Non-disease gene
1174	ENSG00000204052	C6orf154	Non-disease gene
1175	ENSG00000203872	C6orf163	Non-disease gene
1176	ENSG00000213204	C6orf165	Non-disease gene
1177	ENSG00000146263	C6orf167	Non-disease gene
1178	ENSG00000146267	C6orf168	Non-disease gene
1179	ENSG00000183137	C6orf182	Non-disease gene
1180	ENSG00000053328	C6orf186	Non-disease gene
1181	ENSG00000146409	C6orf192	Non-disease gene
1182	ENSG00000185689	C6orf201	Non-disease gene
1183	ENSG00000130349	C6orf203	Non-disease gene
1184	ENSG00000189325	C6orf222	Non-disease gene
1185	ENSG00000221821	C6orf226	Non-disease gene
1186	ENSG00000215712	C6orf35	Non-disease gene
1187	ENSG00000154079	C6orf57	Non-disease gene
1188	ENSG00000184530	C6orf58	Non-disease gene
1189	ENSG00000112167	C6orf64	Non-disease gene
1190	ENSG00000055211	C6orf72	Non-disease gene
1191	ENSG00000157343	C6orf81	Non-disease gene
1192	ENSG00000198663	C6orf89	Non-disease gene
1193	ENSG00000118491	C6orf94	Non-disease gene
1194	ENSG00000135185	C7orf23	Non-disease gene
1195	ENSG00000136197	C7orf25	Non-disease gene
1196	ENSG00000146576	C7orf26	Non-disease gene
1197	ENSG00000156928	C7orf30	Non-disease gene
1198	ENSG00000153790	C7orf31	Non-disease gene
1199	ENSG00000241127	C7orf36	Non-disease gene
1200	ENSG00000106609	C7orf42	Non-disease gene
1201	ENSG00000146826	C7orf43	Non-disease gene
1202	ENSG00000165120	C7orf45	Non-disease gene
1203	ENSG00000188732	C7orf46	Non-disease gene
1204	ENSG00000160813	C7orf47	Non-disease gene
1205	ENSG00000146540	C7orf50	Non-disease gene
1206	ENSG00000166924	C7orf51	Non-disease gene
1207	ENSG00000181016	C7orf53	Non-disease gene
1208	ENSG00000164898	C7orf55	Non-disease gene
1209	ENSG00000164746	C7orf57	Non-disease gene
1210	ENSG00000106034	C7orf58	Non-disease gene
1211	ENSG00000188186	C7orf59	Non-disease gene
1212	ENSG00000164603	C7orf60	Non-disease gene
1213	ENSG00000164645	C7orf62	Non-disease gene
1214	ENSG00000127993	C7orf64	Non-disease gene
1215	ENSG00000164500	C7orf72	Non-disease gene
1216	ENSG00000176919	C8G	Non-disease gene
1217	ENSG00000165084	C8orf34	Non-disease gene
1218	ENSG00000176209	C8orf40	Non-disease gene
1219	ENSG00000180190	C8orf42	Non-disease gene
1220	ENSG00000178460	C8orf45	Non-disease gene
1221	ENSG00000169085	C8orf46	Non-disease gene
1222	ENSG00000177459	C8orf47	Non-disease gene
1223	ENSG00000164743	C8orf48	Non-disease gene
1224	ENSG00000130193	C8orf55	Non-disease gene
1225	ENSG00000171060	C8orf74	Non-disease gene
1226	ENSG00000189376	C8orf76	Non-disease gene
1227	ENSG00000189233	C8orf80	Non-disease gene
1228	ENSG00000213563	C8orf82	Non-disease gene
1229	ENSG00000164764	C8orf84	Non-disease gene
1230	ENSG00000205002	C8orf85	Non-disease gene
1231	ENSG00000137135	C9orf100	Non-disease gene
1232	ENSG00000182150	C9orf102	Non-disease gene
1233	ENSG00000148057	C9orf103	Non-disease gene
1234	ENSG00000120160	C9orf11	Non-disease gene
1235	ENSG00000160345	C9orf116	Non-disease gene
1236	ENSG00000160401	C9orf117	Non-disease gene
1237	ENSG00000175854	C9orf119	Non-disease gene
1238	ENSG00000137038	C9orf123	Non-disease gene
1239	ENSG00000165152	C9orf125	Non-disease gene
1240	ENSG00000173611	C9orf126	Non-disease gene
1241	ENSG00000204930	C9orf128	Non-disease gene
1242	ENSG00000174038	C9orf131	Non-disease gene
1243	ENSG00000204711	C9orf135	Non-disease gene
1244	ENSG00000186193	C9orf140	Non-disease gene
1245	ENSG00000148362	C9orf142	Non-disease gene
1246	ENSG00000215204	C9orf144	Non-disease gene
1247	ENSG00000153714	C9orf150	Non-disease gene
1248	ENSG00000188959	C9orf152	Non-disease gene
1249	ENSG00000187753	C9orf153	Non-disease gene
1250	ENSG00000136932	C9orf156	Non-disease gene
1251	ENSG00000198113	C9orf167	Non-disease gene
1252	ENSG00000197191	C9orf169	Non-disease gene
1253	ENSG00000188523	C9orf171	Non-disease gene
1254	ENSG00000232434	C9orf172	Non-disease gene
1255	ENSG00000197768	C9orf173	Non-disease gene
1256	ENSG00000158122	C9orf21	Non-disease gene
1257	ENSG00000164967	C9orf23	Non-disease gene
1258	ENSG00000164972	C9orf24	Non-disease gene
1259	ENSG00000164970	C9orf25	Non-disease gene
1260	ENSG00000148120	C9orf3	Non-disease gene
1261	ENSG00000066697	C9orf30	Non-disease gene
1262	ENSG00000136805	C9orf4	Non-disease gene
1263	ENSG00000135045	C9orf40	Non-disease gene
1264	ENSG00000156017	C9orf41	Non-disease gene
1265	ENSG00000157653	C9orf43	Non-disease gene
1266	ENSG00000107020	C9orf46	Non-disease gene
1267	ENSG00000106771	C9orf5	Non-disease gene
1268	ENSG00000179058	C9orf50	Non-disease gene
1269	ENSG00000204669	C9orf57	Non-disease gene
1270	ENSG00000119328	C9orf6	Non-disease gene
1271	ENSG00000135063	C9orf61	Non-disease gene
1272	ENSG00000106686	C9orf68	Non-disease gene
1273	ENSG00000160325	C9orf7	Non-disease gene
1274	ENSG00000181778	C9orf71	Non-disease gene
1275	ENSG00000147894	C9orf72	Non-disease gene
1276	ENSG00000148153	C9orf80	Non-disease gene
1277	ENSG00000165181	C9orf84	Non-disease gene
1278	ENSG00000155621	C9orf85	Non-disease gene
1279	ENSG00000165233	C9orf89	Non-disease gene
1280	ENSG00000157693	C9orf91	Non-disease gene
1281	ENSG00000164989	C9orf93	Non-disease gene
1282	ENSG00000198870	C9orf96	Non-disease gene
1283	ENSG00000165695	C9orf98	Non-disease gene
1284	ENSG00000063180	CA11	Non-disease gene
1285	ENSG00000185015	CA13	Non-disease gene
1286	ENSG00000118298	CA14	Non-disease gene
1287	ENSG00000164879	CA3	Non-disease gene
1288	ENSG00000169239	CA5B	Non-disease gene
1289	ENSG00000168748	CA7	Non-disease gene
1290	ENSG00000102547	CAB39L	Non-disease gene
1291	ENSG00000134508	CABLES1	Non-disease gene
1292	ENSG00000149679	CABLES2	Non-disease gene
1293	ENSG00000105507	CABP5	Non-disease gene
1294	ENSG00000100314	CABP7	Non-disease gene
1295	ENSG00000158966	CACHD1	Non-disease gene
1296	ENSG00000157445	CACNA2D3	Non-disease gene
1297	ENSG00000167535	CACNB3	Non-disease gene
1298	ENSG00000166862	CACNG2	Non-disease gene
1299	ENSG00000075461	CACNG4	Non-disease gene
1300	ENSG00000075429	CACNG5	Non-disease gene
1301	ENSG00000130433	CACNG6	Non-disease gene
1302	ENSG00000105605	CACNG7	Non-disease gene
1303	ENSG00000142408	CACNG8	Non-disease gene
1304	ENSG00000175161	CADM2	Non-disease gene
1305	ENSG00000105767	CADM4	Non-disease gene
1306	ENSG00000163618	CADPS	Non-disease gene
1307	ENSG00000081803	CADPS2	Non-disease gene
1308	ENSG00000012822	CALCOCO1	Non-disease gene
1309	ENSG00000129007	CALML4	Non-disease gene
1310	ENSG00000183166	CALN1	Non-disease gene
1311	ENSG00000134072	CAMK1	Non-disease gene
1312	ENSG00000183049	CAMK1D	Non-disease gene
1313	ENSG00000008118	CAMK1G	Non-disease gene
1314	ENSG00000058404	CAMK2B	Non-disease gene
1315	ENSG00000004660	CAMKK1	Non-disease gene
1316	ENSG00000164076	CAMKV	Non-disease gene
1317	ENSG00000130559	CAMSAP1	Non-disease gene
1318	ENSG00000118200	CAMSAP1L1	Non-disease gene
1319	ENSG00000144712	CAND2	Non-disease gene
1320	ENSG00000112186	CAP2	Non-disease gene
1321	ENSG00000042493	CAPG	Non-disease gene
1322	ENSG00000137225	CAPN11	Non-disease gene
1323	ENSG00000182472	CAPN12	Non-disease gene
1324	ENSG00000077274	CAPN6	Non-disease gene
1325	ENSG00000203697	CAPN8	Non-disease gene
1326	ENSG00000126247	CAPNS1	Non-disease gene
1327	ENSG00000180881	CAPS2	Non-disease gene
1328	ENSG00000152611	CAPSL	Non-disease gene
1329	ENSG00000177938	CAPZA3	Non-disease gene
1330	ENSG00000100065	CARD10	Non-disease gene
1331	ENSG00000198286	CARD11	Non-disease gene
1332	ENSG00000132357	CARD6	Non-disease gene
1333	ENSG00000153048	CARHSP1	Non-disease gene
1334	ENSG00000172508	CARNS1	Non-disease gene
1335	ENSG00000134905	CARS2	Non-disease gene
1336	ENSG00000166734	CASC4	Non-disease gene
1337	ENSG00000127995	CASD1	Non-disease gene
1338	ENSG00000167971	CASKIN1	Non-disease gene
1339	ENSG00000177303	CASKIN2	Non-disease gene
1340	ENSG00000118412	CASP8AP2	Non-disease gene
1341	ENSG00000087589	CASS4	Non-disease gene
1342	ENSG00000133962	CATSPERB	Non-disease gene
1343	ENSG00000107745	CBARA1	Non-disease gene
1344	ENSG00000078699	CBFA2T2	Non-disease gene
1345	ENSG00000105879	CBLL1	Non-disease gene
1346	ENSG00000102924	CBLN1	Non-disease gene
1347	ENSG00000141668	CBLN2	Non-disease gene
1348	ENSG00000139899	CBLN3	Non-disease gene
1349	ENSG00000054803	CBLN4	Non-disease gene
1350	ENSG00000100307	CBX7	Non-disease gene
1351	ENSG00000100211	CBY1	Non-disease gene
1352	ENSG00000204659	CBY3	Non-disease gene
1353	ENSG00000154222	CC2D1B	Non-disease gene
1354	ENSG00000060339	CCAR1	Non-disease gene
1355	ENSG00000171097	CCBL1	Non-disease gene
1356	ENSG00000144648	CCBP2	Non-disease gene
1357	ENSG00000135736	CCDC102A	Non-disease gene
1358	ENSG00000163001	CCDC104	Non-disease gene
1359	ENSG00000160994	CCDC105	Non-disease gene
1360	ENSG00000173581	CCDC106	Non-disease gene
1361	ENSG00000159884	CCDC107	Non-disease gene
1362	ENSG00000181378	CCDC108	Non-disease gene
1363	ENSG00000156026	CCDC109A	Non-disease gene
1364	ENSG00000005059	CCDC109B	Non-disease gene
1365	ENSG00000172361	CCDC11	Non-disease gene
1366	ENSG00000168491	CCDC110	Non-disease gene
1367	ENSG00000164306	CCDC111	Non-disease gene
1368	ENSG00000103021	CCDC113	Non-disease gene
1369	ENSG00000105479	CCDC114	Non-disease gene
1370	ENSG00000136710	CCDC115	Non-disease gene
1371	ENSG00000161180	CCDC116	Non-disease gene
1372	ENSG00000159873	CCDC117	Non-disease gene
1373	ENSG00000160799	CCDC12	Non-disease gene
1374	ENSG00000147144	CCDC120	Non-disease gene
1375	ENSG00000121289	CCDC123	Non-disease gene
1376	ENSG00000007080	CCDC124	Non-disease gene
1377	ENSG00000183323	CCDC125	Non-disease gene
1378	ENSG00000169193	CCDC126	Non-disease gene
1379	ENSG00000164366	CCDC127	Non-disease gene
1380	ENSG00000180347	CCDC129	Non-disease gene
1381	ENSG00000104957	CCDC130	Non-disease gene
1382	ENSG00000004766	CCDC132	Non-disease gene
1383	ENSG00000100147	CCDC134	Non-disease gene
1384	ENSG00000159625	CCDC135	Non-disease gene
1385	ENSG00000128596	CCDC136	Non-disease gene
1386	ENSG00000185298	CCDC137	Non-disease gene
1387	ENSG00000163006	CCDC138	Non-disease gene
1388	ENSG00000163492	CCDC141	Non-disease gene
1389	ENSG00000135637	CCDC142	Non-disease gene
1390	ENSG00000135205	CCDC146	Non-disease gene
1391	ENSG00000120051	CCDC147	Non-disease gene
1392	ENSG00000153237	CCDC148	Non-disease gene
1393	ENSG00000181982	CCDC149	Non-disease gene
1394	ENSG00000149548	CCDC15	Non-disease gene
1395	ENSG00000144395	CCDC150	Non-disease gene
1396	ENSG00000198003	CCDC151	Non-disease gene
1397	ENSG00000197599	CCDC154	Non-disease gene
1398	ENSG00000161609	CCDC155	Non-disease gene
1399	ENSG00000187860	CCDC157	Non-disease gene
1400	ENSG00000163749	CCDC158	Non-disease gene
1401	ENSG00000183401	CCDC159	Non-disease gene
1402	ENSG00000203952	CCDC160	Non-disease gene
1403	ENSG00000159588	CCDC17	Non-disease gene
1404	ENSG00000122483	CCDC18	Non-disease gene
1405	ENSG00000213085	CCDC19	Non-disease gene
1406	ENSG00000130695	CCDC21	Non-disease gene
1407	ENSG00000159214	CCDC24	Non-disease gene
1408	ENSG00000147419	CCDC25	Non-disease gene
1409	ENSG00000162592	CCDC27	Non-disease gene
1410	ENSG00000151468	CCDC3	Non-disease gene
1411	ENSG00000186409	CCDC30	Non-disease gene
1412	ENSG00000140481	CCDC33	Non-disease gene
1413	ENSG00000109881	CCDC34	Non-disease gene
1414	ENSG00000173421	CCDC36	Non-disease gene
1415	ENSG00000163885	CCDC37	Non-disease gene
1416	ENSG00000165972	CCDC38	Non-disease gene
1417	ENSG00000173588	CCDC41	Non-disease gene
1418	ENSG00000161973	CCDC42	Non-disease gene
1419	ENSG00000180329	CCDC43	Non-disease gene
1420	ENSG00000141325	CCDC45	Non-disease gene
1421	ENSG00000154240	CCDC46	Non-disease gene
1422	ENSG00000114654	CCDC48	Non-disease gene
1423	ENSG00000164051	CCDC51	Non-disease gene
1424	ENSG00000163611	CCDC52	Non-disease gene
1425	ENSG00000120860	CCDC53	Non-disease gene
1426	ENSG00000138483	CCDC54	Non-disease gene
1427	ENSG00000126653	CCDC55	Non-disease gene
1428	ENSG00000176155	CCDC57	Non-disease gene
1429	ENSG00000160124	CCDC58	Non-disease gene
1430	ENSG00000133773	CCDC59	Non-disease gene
1431	ENSG00000183273	CCDC60	Non-disease gene
1432	ENSG00000104983	CCDC61	Non-disease gene
1433	ENSG00000130783	CCDC62	Non-disease gene
1434	ENSG00000173093	CCDC63	Non-disease gene
1435	ENSG00000135127	CCDC64	Non-disease gene
1436	ENSG00000162069	CCDC64B	Non-disease gene
1437	ENSG00000139537	CCDC65	Non-disease gene
1438	ENSG00000180376	CCDC66	Non-disease gene
1439	ENSG00000165325	CCDC67	Non-disease gene
1440	ENSG00000166510	CCDC68	Non-disease gene
1441	ENSG00000198624	CCDC69	Non-disease gene
1442	ENSG00000123171	CCDC70	Non-disease gene
1443	ENSG00000177352	CCDC71	Non-disease gene
1444	ENSG00000186714	CCDC73	Non-disease gene
1445	ENSG00000152133	CCDC75	Non-disease gene
1446	ENSG00000122435	CCDC76	Non-disease gene
1447	ENSG00000120647	CCDC77	Non-disease gene
1448	ENSG00000162004	CCDC78	Non-disease gene
1449	ENSG00000169515	CCDC8	Non-disease gene
1450	ENSG00000091986	CCDC80	Non-disease gene
1451	ENSG00000149201	CCDC81	Non-disease gene
1452	ENSG00000149231	CCDC82	Non-disease gene
1453	ENSG00000150676	CCDC83	Non-disease gene
1454	ENSG00000186166	CCDC84	Non-disease gene
1455	ENSG00000055813	CCDC85A	Non-disease gene
1456	ENSG00000110104	CCDC86	Non-disease gene
1457	ENSG00000182791	CCDC87	Non-disease gene
1458	ENSG00000115355	CCDC88A	Non-disease gene
1459	ENSG00000168071	CCDC88B	Non-disease gene
1460	ENSG00000179071	CCDC89	Non-disease gene
1461	ENSG00000105321	CCDC9	Non-disease gene
1462	ENSG00000119242	CCDC92	Non-disease gene
1463	ENSG00000125633	CCDC93	Non-disease gene
1464	ENSG00000105248	CCDC94	Non-disease gene
1465	ENSG00000173013	CCDC96	Non-disease gene
1466	ENSG00000142039	CCDC97	Non-disease gene
1467	ENSG00000040275	CCDC99	Non-disease gene
1468	ENSG00000185972	CCIN	Non-disease gene
1469	ENSG00000151882	CCL28	Non-disease gene
1470	ENSG00000157456	CCNB2	Non-disease gene
1471	ENSG00000147082	CCNB3	Non-disease gene
1472	ENSG00000166946	CCNDBP1	Non-disease gene
1473	ENSG00000107443	CCNJ	Non-disease gene
1474	ENSG00000135083	CCNJL	Non-disease gene
1475	ENSG00000221978	CCNL2	Non-disease gene
1476	ENSG00000152669	CCNO	Non-disease gene
1477	ENSG00000082258	CCNT2	Non-disease gene
1478	ENSG00000163249	CCNYL1	Non-disease gene
1479	ENSG00000156345	CCRK	Non-disease gene
1480	ENSG00000151014	CCRN4L	Non-disease gene
1481	ENSG00000132141	CCT6B	Non-disease gene
1482	ENSG00000134256	CD101	Non-disease gene
1483	ENSG00000156535	CD109	Non-disease gene
1484	ENSG00000174950	CD164L2	Non-disease gene
1485	ENSG00000103855	CD276	Non-disease gene
1486	ENSG00000169217	CD2BP2	Non-disease gene
1487	ENSG00000186407	CD300E	Non-disease gene
1488	ENSG00000178789	CD300LB	Non-disease gene
1489	ENSG00000161649	CD300LG	Non-disease gene
1490	ENSG00000241399	CD302	Non-disease gene
1491	ENSG00000073754	CD5L	Non-disease gene
1492	ENSG00000066294	CD84	Non-disease gene
1493	ENSG00000102181	CD99L2	Non-disease gene
1494	ENSG00000102543	CDADC1	Non-disease gene
1495	ENSG00000079335	CDC14A	Non-disease gene
1496	ENSG00000081377	CDC14B	Non-disease gene
1497	ENSG00000164287	CDC20B	Non-disease gene
1498	ENSG00000065883	CDC2L5	Non-disease gene
1499	ENSG00000155111	CDC2L6	Non-disease gene
1500	ENSG00000099804	CDC34	Non-disease gene
1501	ENSG00000106993	CDC37L1	Non-disease gene
1502	ENSG00000168438	CDC40	Non-disease gene
1503	ENSG00000171219	CDC42BPG	Non-disease gene
1504	ENSG00000128283	CDC42EP1	Non-disease gene
1505	ENSG00000149798	CDC42EP2	Non-disease gene
1506	ENSG00000163171	CDC42EP3	Non-disease gene
1507	ENSG00000179604	CDC42EP4	Non-disease gene
1508	ENSG00000167617	CDC42EP5	Non-disease gene
1509	ENSG00000097046	CDC7	Non-disease gene
1510	ENSG00000184661	CDCA2	Non-disease gene
1511	ENSG00000111665	CDCA3	Non-disease gene
1512	ENSG00000170779	CDCA4	Non-disease gene
1513	ENSG00000146670	CDCA5	Non-disease gene
1514	ENSG00000144354	CDCA7	Non-disease gene
1515	ENSG00000164649	CDCA7L	Non-disease gene
1516	ENSG00000134690	CDCA8	Non-disease gene
1517	ENSG00000157211	CDCP2	Non-disease gene
1518	ENSG00000040731	CDH10	Non-disease gene
1519	ENSG00000145526	CDH18	Non-disease gene
1520	ENSG00000101542	CDH20	Non-disease gene
1521	ENSG00000149654	CDH22	Non-disease gene
1522	ENSG00000139880	CDH24	Non-disease gene
1523	ENSG00000124215	CDH26	Non-disease gene
1524	ENSG00000081138	CDH7	Non-disease gene
1525	ENSG00000113100	CDH9	Non-disease gene
1526	ENSG00000128536	CDHR3	Non-disease gene
1527	ENSG00000187492	CDHR4	Non-disease gene
1528	ENSG00000099834	CDHR5	Non-disease gene
1529	ENSG00000008128	CDK11A	Non-disease gene
1530	ENSG00000058091	CDK14	Non-disease gene
1531	ENSG00000138395	CDK15	Non-disease gene
1532	ENSG00000102225	CDK16	Non-disease gene
1533	ENSG00000059758	CDK17	Non-disease gene
1534	ENSG00000167797	CDK2AP2	Non-disease gene
1535	ENSG00000101391	CDK5RAP1	Non-disease gene
1536	ENSG00000132964	CDK8	Non-disease gene
1537	ENSG00000138769	CDKL2	Non-disease gene
1538	ENSG00000205111	CDKL4	Non-disease gene
1539	ENSG00000168564	CDKN2AIP	Non-disease gene
1540	ENSG00000237190	CDKN2AIPNL	Non-disease gene
1541	ENSG00000185267	CDNF	Non-disease gene
1542	ENSG00000129596	CDO1	Non-disease gene
1543	ENSG00000109089	CDR2L	Non-disease gene
1544	ENSG00000239704	CDRT4	Non-disease gene
1545	ENSG00000101290	CDS2	Non-disease gene
1546	ENSG00000091527	CDV3	Non-disease gene
1547	ENSG00000131264	CDX4	Non-disease gene
1548	ENSG00000153046	CDYL	Non-disease gene
1549	ENSG00000166446	CDYL2	Non-disease gene
1550	ENSG00000213892	CEACAM16	Non-disease gene
1551	ENSG00000213822	CEACAM18	Non-disease gene
1552	ENSG00000186567	CEACAM19	Non-disease gene
1553	ENSG00000099954	CECR2	Non-disease gene
1554	ENSG00000101489	CELF4	Non-disease gene
1555	ENSG00000161082	CELF5	Non-disease gene
1556	ENSG00000184524	CEND1	Non-disease gene
1557	ENSG00000102384	CENPI	Non-disease gene
1558	ENSG00000123219	CENPK	Non-disease gene
1559	ENSG00000120334	CENPL	Non-disease gene
1560	ENSG00000100162	CENPM	Non-disease gene
1561	ENSG00000166451	CENPN	Non-disease gene
1562	ENSG00000138092	CENPO	Non-disease gene
1563	ENSG00000188312	CENPP	Non-disease gene
1564	ENSG00000031691	CENPQ	Non-disease gene
1565	ENSG00000102901	CENPT	Non-disease gene
1566	ENSG00000166582	CENPV	Non-disease gene
1567	ENSG00000203760	CENPW	Non-disease gene
1568	ENSG00000168944	CEP120	Non-disease gene
1569	ENSG00000110274	CEP164	Non-disease gene
1570	ENSG00000143702	CEP170	Non-disease gene
1571	ENSG00000138180	CEP55	Non-disease gene
1572	ENSG00000114107	CEP70	Non-disease gene
1573	ENSG00000112877	CEP72	Non-disease gene
1574	ENSG00000101624	CEP76	Non-disease gene
1575	ENSG00000148019	CEP78	Non-disease gene
1576	ENSG00000182504	CEP97	Non-disease gene
1577	ENSG00000134255	CEPT1	Non-disease gene
1578	ENSG00000167123	CERCAM	Non-disease gene
1579	ENSG00000100422	CERK	Non-disease gene
1580	ENSG00000159398	CES7	Non-disease gene
1581	ENSG00000172824	CES8	Non-disease gene
1582	ENSG00000198445	CESK1	Non-disease gene
1583	ENSG00000177143	CETN1	Non-disease gene
1584	ENSG00000153140	CETN3	Non-disease gene
1585	ENSG00000153774	CFDP1	Non-disease gene
1586	ENSG00000143375	CGN	Non-disease gene
1587	ENSG00000138028	CGREF1	Non-disease gene
1588	ENSG00000128965	CHAC1	Non-disease gene
1589	ENSG00000143942	CHAC2	Non-disease gene
1590	ENSG00000136457	CHAD	Non-disease gene
1591	ENSG00000167670	CHAF1A	Non-disease gene
1592	ENSG00000172586	CHCHD1	Non-disease gene
1593	ENSG00000250479	CHCHD10	Non-disease gene
1594	ENSG00000125611	CHCHD5	Non-disease gene
1595	ENSG00000159685	CHCHD6	Non-disease gene
1596	ENSG00000170791	CHCHD7	Non-disease gene
1597	ENSG00000153922	CHD1	Non-disease gene
1598	ENSG00000131778	CHD1L	Non-disease gene
1599	ENSG00000016391	CHDH	Non-disease gene
1600	ENSG00000177830	CHID1	Non-disease gene
1601	ENSG00000164695	CHMP4C	Non-disease gene
1602	ENSG00000176108	CHMP6	Non-disease gene
1603	ENSG00000154645	CHODL	Non-disease gene
1604	ENSG00000123989	CHPF	Non-disease gene
1605	ENSG00000033100	CHPF2	Non-disease gene
1606	ENSG00000104472	CHRAC1	Non-disease gene
1607	ENSG00000090539	CHRD	Non-disease gene
1608	ENSG00000054938	CHRDL2	Non-disease gene
1609	ENSG00000129749	CHRNA10	Non-disease gene
1610	ENSG00000147434	CHRNA6	Non-disease gene
1611	ENSG00000175264	CHST1	Non-disease gene
1612	ENSG00000115526	CHST10	Non-disease gene
1613	ENSG00000136213	CHST12	Non-disease gene
1614	ENSG00000180767	CHST13	Non-disease gene
1615	ENSG00000182022	CHST15	Non-disease gene
1616	ENSG00000147119	CHST7	Non-disease gene
1617	ENSG00000124302	CHST8	Non-disease gene
1618	ENSG00000154080	CHST9	Non-disease gene
1619	ENSG00000198108	CHSY3	Non-disease gene
1620	ENSG00000127586	CHTF18	Non-disease gene
1621	ENSG00000168802	CHTF8	Non-disease gene
1622	ENSG00000144021	CIAO1	Non-disease gene
1623	ENSG00000136425	CIB2	Non-disease gene
1624	ENSG00000141977	CIB3	Non-disease gene
1625	ENSG00000157884	CIB4	Non-disease gene
1626	ENSG00000136305	CIDEB	Non-disease gene
1627	ENSG00000160161	CILP2	Non-disease gene
1628	ENSG00000100865	CINP	Non-disease gene
1629	ENSG00000138433	CIR1	Non-disease gene
1630	ENSG00000122873	CISD1	Non-disease gene
1631	ENSG00000230055	CISD3	Non-disease gene
1632	ENSG00000125931	CITED1	Non-disease gene
1633	ENSG00000179862	CITED4	Non-disease gene
1634	ENSG00000136108	CKAP2	Non-disease gene
1635	ENSG00000169607	CKAP2L	Non-disease gene
1636	ENSG00000131730	CKMT2	Non-disease gene
1637	ENSG00000163539	CLASP2	Non-disease gene
1638	ENSG00000121940	CLCC1	Non-disease gene
1639	ENSG00000157224	CLDN12	Non-disease gene
1640	ENSG00000106404	CLDN15	Non-disease gene
1641	ENSG00000156282	CLDN17	Non-disease gene
1642	ENSG00000165376	CLDN2	Non-disease gene
1643	ENSG00000184697	CLDN6	Non-disease gene
1644	ENSG00000156284	CLDN8	Non-disease gene
1645	ENSG00000213937	CLDN9	Non-disease gene
1646	ENSG00000080822	CLDND1	Non-disease gene
1647	ENSG00000160318	CLDND2	Non-disease gene
1648	ENSG00000172322	CLEC12B	Non-disease gene
1649	ENSG00000176435	CLEC14A	Non-disease gene
1650	ENSG00000150048	CLEC1A	Non-disease gene
1651	ENSG00000165682	CLEC1B	Non-disease gene
1652	ENSG00000236279	CLEC2L	Non-disease gene
1653	ENSG00000166509	CLEC3A	Non-disease gene
1654	ENSG00000166527	CLEC4D	Non-disease gene
1655	ENSG00000166523	CLEC4E	Non-disease gene
1656	ENSG00000152672	CLEC4F	Non-disease gene
1657	ENSG00000182566	CLEC4G	Non-disease gene
1658	ENSG00000205846	CLEC6A	Non-disease gene
1659	ENSG00000197992	CLEC9A	Non-disease gene
1660	ENSG00000169583	CLIC3	Non-disease gene
1661	ENSG00000169504	CLIC4	Non-disease gene
1662	ENSG00000112782	CLIC5	Non-disease gene
1663	ENSG00000159212	CLIC6	Non-disease gene
1664	ENSG00000105270	CLIP3	Non-disease gene
1665	ENSG00000115295	CLIP4	Non-disease gene
1666	ENSG00000179335	CLK3	Non-disease gene
1667	ENSG00000165959	CLMN	Non-disease gene
1668	ENSG00000162129	CLPB	Non-disease gene
1669	ENSG00000125656	CLPP	Non-disease gene
1670	ENSG00000249581	CLRN2	Non-disease gene
1671	ENSG00000180745	CLRN3	Non-disease gene
1672	ENSG00000092853	CLSPN	Non-disease gene
1673	ENSG00000139182	CLSTN3	Non-disease gene
1674	ENSG00000175416	CLTB	Non-disease gene
1675	ENSG00000103351	CLUAP1	Non-disease gene
1676	ENSG00000177182	CLVS1	Non-disease gene
1677	ENSG00000168405	CMAH	Non-disease gene
1678	ENSG00000111726	CMAS	Non-disease gene
1679	ENSG00000164237	CMBL	Non-disease gene
1680	ENSG00000174600	CMKLR1	Non-disease gene
1681	ENSG00000134326	CMPK2	Non-disease gene
1682	ENSG00000089505	CMTM1	Non-disease gene
1683	ENSG00000140931	CMTM3	Non-disease gene
1684	ENSG00000183723	CMTM4	Non-disease gene
1685	ENSG00000170293	CMTM8	Non-disease gene
1686	ENSG00000176571	CNBD1	Non-disease gene
1687	ENSG00000105427	CNFN	Non-disease gene
1688	ENSG00000183862	CNGA2	Non-disease gene
1689	ENSG00000132259	CNGA4	Non-disease gene
1690	ENSG00000174871	CNIH2	Non-disease gene
1691	ENSG00000143786	CNIH3	Non-disease gene
1692	ENSG00000143771	CNIH4	Non-disease gene
1693	ENSG00000153721	CNKSR3	Non-disease gene
1694	ENSG00000064666	CNN2	Non-disease gene
1695	ENSG00000119946	CNNM1	Non-disease gene
1696	ENSG00000148842	CNNM2	Non-disease gene
1697	ENSG00000182973	CNOT10	Non-disease gene
1698	ENSG00000113300	CNOT6	Non-disease gene
1699	ENSG00000138767	CNOT6L	Non-disease gene
1700	ENSG00000144785	CNPY2	Non-disease gene
1701	ENSG00000166997	CNPY4	Non-disease gene
1702	ENSG00000119865	CNRIP1	Non-disease gene
1703	ENSG00000162852	CNST	Non-disease gene
1704	ENSG00000176563	CNTD1	Non-disease gene
1705	ENSG00000044459	CNTLN	Non-disease gene
1706	ENSG00000113805	CNTN3	Non-disease gene
1707	ENSG00000149972	CNTN5	Non-disease gene
1708	ENSG00000134115	CNTN6	Non-disease gene
1709	ENSG00000170037	CNTROB	Non-disease gene
1710	ENSG00000068120	COASY	Non-disease gene
1711	ENSG00000106078	COBL	Non-disease gene
1712	ENSG00000082438	COBLL1	Non-disease gene
1713	ENSG00000136152	COG3	Non-disease gene
1714	ENSG00000197467	COL13A1	Non-disease gene
1715	ENSG00000084636	COL16A1	Non-disease gene
1716	ENSG00000082293	COL19A1	Non-disease gene
1717	ENSG00000101203	COL20A1	Non-disease gene
1718	ENSG00000169436	COL22A1	Non-disease gene
1719	ENSG00000050767	COL23A1	Non-disease gene
1720	ENSG00000171502	COL24A1	Non-disease gene
1721	ENSG00000196739	COL27A1	Non-disease gene
1722	ENSG00000215018	COL28A1	Non-disease gene
1723	ENSG00000113163	COL4A3BP	Non-disease gene
1724	ENSG00000080573	COL5A3	Non-disease gene
1725	ENSG00000144810	COL8A1	Non-disease gene
1726	ENSG00000184374	COLEC10	Non-disease gene
1727	ENSG00000145781	COMMD10	Non-disease gene
1728	ENSG00000114744	COMMD2	Non-disease gene
1729	ENSG00000170619	COMMD5	Non-disease gene
1730	ENSG00000188243	COMMD6	Non-disease gene
1731	ENSG00000110442	COMMD9	Non-disease gene
1732	ENSG00000165644	COMTD1	Non-disease gene
1733	ENSG00000105669	COPE	Non-disease gene
1734	ENSG00000181789	COPG	Non-disease gene
1735	ENSG00000158623	COPG2	Non-disease gene
1736	ENSG00000111652	COPS7A	Non-disease gene
1737	ENSG00000144524	COPS7B	Non-disease gene
1738	ENSG00000005243	COPZ2	Non-disease gene
1739	ENSG00000135469	COQ10A	Non-disease gene
1740	ENSG00000132423	COQ3	Non-disease gene
1741	ENSG00000167186	COQ7	Non-disease gene
1742	ENSG00000172725	CORO1B	Non-disease gene
1743	ENSG00000106789	CORO2A	Non-disease gene
1744	ENSG00000103647	CORO2B	Non-disease gene
1745	ENSG00000167549	CORO6	Non-disease gene
1746	ENSG00000103426	CORO7	Non-disease gene
1747	ENSG00000166260	COX11	Non-disease gene
1748	ENSG00000163626	COX18	Non-disease gene
1749	ENSG00000240230	COX19	Non-disease gene
1750	ENSG00000131148	COX4NB	Non-disease gene
1751	ENSG00000158516	CPA2	Non-disease gene
1752	ENSG00000214575	CPEB1	Non-disease gene
1753	ENSG00000137449	CPEB2	Non-disease gene
1754	ENSG00000107864	CPEB3	Non-disease gene
1755	ENSG00000113742	CPEB4	Non-disease gene
1756	ENSG00000213578	CPLX3	Non-disease gene
1757	ENSG00000166569	CPLX4	Non-disease gene
1758	ENSG00000135678	CPM	Non-disease gene
1759	ENSG00000140848	CPNE2	Non-disease gene
1760	ENSG00000196353	CPNE4	Non-disease gene
1761	ENSG00000124772	CPNE5	Non-disease gene
1762	ENSG00000100884	CPNE6	Non-disease gene
1763	ENSG00000178773	CPNE7	Non-disease gene
1764	ENSG00000139117	CPNE8	Non-disease gene
1765	ENSG00000144550	CPNE9	Non-disease gene
1766	ENSG00000103381	CPPED1	Non-disease gene
1767	ENSG00000071894	CPSF1	Non-disease gene
1768	ENSG00000165934	CPSF2	Non-disease gene
1769	ENSG00000119203	CPSF3	Non-disease gene
1770	ENSG00000160917	CPSF4	Non-disease gene
1771	ENSG00000187959	CPSF4L	Non-disease gene
1772	ENSG00000111605	CPSF6	Non-disease gene
1773	ENSG00000205560	CPT1B	Non-disease gene
1774	ENSG00000169169	CPT1C	Non-disease gene
1775	ENSG00000106066	CPVL	Non-disease gene
1776	ENSG00000147183	CPXCR1	Non-disease gene
1777	ENSG00000088882	CPXM1	Non-disease gene
1778	ENSG00000121898	CPXM2	Non-disease gene
1779	ENSG00000007545	CRAMP1L	Non-disease gene
1780	ENSG00000130545	CRB3	Non-disease gene
1781	ENSG00000241258	CRCP	Non-disease gene
1782	ENSG00000060566	CREB3L3	Non-disease gene
1783	ENSG00000143578	CREB3L4	Non-disease gene
1784	ENSG00000146592	CREB5	Non-disease gene
1785	ENSG00000137504	CREBZF	Non-disease gene
1786	ENSG00000175874	CREG2	Non-disease gene
1787	ENSG00000106113	CRHR2	Non-disease gene
1788	ENSG00000150938	CRIM1	Non-disease gene
1789	ENSG00000182809	CRIP2	Non-disease gene
1790	ENSG00000146215	CRIP3	Non-disease gene
1791	ENSG00000119878	CRIPT	Non-disease gene
1792	ENSG00000124812	CRISP1	Non-disease gene
1793	ENSG00000121005	CRISPLD1	Non-disease gene
1794	ENSG00000103196	CRISPLD2	Non-disease gene
1795	ENSG00000167258	CRKRS	Non-disease gene
1796	ENSG00000101343	CRNKL1	Non-disease gene
1797	ENSG00000143536	CRNN	Non-disease gene
1798	ENSG00000095713	CRTAC1	Non-disease gene
1799	ENSG00000109943	CRTAM	Non-disease gene
1800	ENSG00000160741	CRTC2	Non-disease gene
1801	ENSG00000121671	CRY2	Non-disease gene
1802	ENSG00000163499	CRYBA2	Non-disease gene
1803	ENSG00000080200	CRYBG3	Non-disease gene
1804	ENSG00000127377	CRYGN	Non-disease gene
1805	ENSG00000165475	CRYL1	Non-disease gene
1806	ENSG00000205758	CRYZL1	Non-disease gene
1807	ENSG00000060138	CSDA	Non-disease gene
1808	ENSG00000172346	CSDC2	Non-disease gene
1809	ENSG00000169826	CSGALNACT2	Non-disease gene
1810	ENSG00000169118	CSNK1G1	Non-disease gene
1811	ENSG00000133275	CSNK1G2	Non-disease gene
1812	ENSG00000151292	CSNK1G3	Non-disease gene
1813	ENSG00000114646	CSPG5	Non-disease gene
1814	ENSG00000104218	CSPP1	Non-disease gene
1815	ENSG00000144655	CSRNP1	Non-disease gene
1816	ENSG00000110925	CSRNP2	Non-disease gene
1817	ENSG00000178662	CSRNP3	Non-disease gene
1818	ENSG00000175183	CSRP2	Non-disease gene
1819	ENSG00000149474	CSRP2BP	Non-disease gene
1820	ENSG00000125831	CST11	Non-disease gene
1821	ENSG00000077984	CST7	Non-disease gene
1822	ENSG00000125815	CST8	Non-disease gene
1823	ENSG00000173335	CST9	Non-disease gene
1824	ENSG00000101138	CSTF1	Non-disease gene
1825	ENSG00000101811	CSTF2	Non-disease gene
1826	ENSG00000125823	CSTL1	Non-disease gene
1827	ENSG00000117151	CTBS	Non-disease gene
1828	ENSG00000253251	CTC-534A2.2	Non-disease gene
1829	ENSG00000137770	CTDSPL2	Non-disease gene
1830	ENSG00000066032	CTNNA2	Non-disease gene
1831	ENSG00000119326	CTNNAL1	Non-disease gene
1832	ENSG00000047230	CTPS2	Non-disease gene
1833	ENSG00000141086	CTRL	Non-disease gene
1834	ENSG00000174080	CTSF	Non-disease gene
1835	ENSG00000143079	CTTNBP2NL	Non-disease gene
1836	ENSG00000174177	CTU2	Non-disease gene
1837	ENSG00000180891	CUEDC1	Non-disease gene
1838	ENSG00000119929	CUTC	Non-disease gene
1839	ENSG00000138161	CUZD1	Non-disease gene
1840	ENSG00000150316	CWC15	Non-disease gene
1841	ENSG00000108296	CWC25	Non-disease gene
1842	ENSG00000153015	CWC27	Non-disease gene
1843	ENSG00000095485	CWF19L1	Non-disease gene
1844	ENSG00000152404	CWF19L2	Non-disease gene
1845	ENSG00000109182	CWH43	Non-disease gene
1846	ENSG00000161921	CXCL16	Non-disease gene
1847	ENSG00000189377	CXCL17	Non-disease gene
1848	ENSG00000120280	CXorf21	Non-disease gene
1849	ENSG00000165164	CXorf22	Non-disease gene
1850	ENSG00000173681	CXorf23	Non-disease gene
1851	ENSG00000102390	CXorf26	Non-disease gene
1852	ENSG00000187516	CXorf27	Non-disease gene
1853	ENSG00000147113	CXorf36	Non-disease gene
1854	ENSG00000185753	CXorf38	Non-disease gene
1855	ENSG00000169551	CXorf48	Non-disease gene
1856	ENSG00000018610	CXorf56	Non-disease gene
1857	ENSG00000147231	CXorf57	Non-disease gene
1858	ENSG00000183631	CXorf64	Non-disease gene
1859	ENSG00000203933	CXorf66	Non-disease gene
1860	ENSG00000187690	CXorf67	Non-disease gene
1861	ENSG00000168772	CXXC4	Non-disease gene
1862	ENSG00000171604	CXXC5	Non-disease gene
1863	ENSG00000008283	CYB561	Non-disease gene
1864	ENSG00000174151	CYB561D1	Non-disease gene
1865	ENSG00000103018	CYB5B	Non-disease gene
1866	ENSG00000167740	CYB5D2	Non-disease gene
1867	ENSG00000166394	CYB5R2	Non-disease gene
1868	ENSG00000065615	CYB5R4	Non-disease gene
1869	ENSG00000215883	CYB5RL	Non-disease gene
1870	ENSG00000162144	CYBASC3	Non-disease gene
1871	ENSG00000179091	CYC1	Non-disease gene
1872	ENSG00000055163	CYFIP2	Non-disease gene
1873	ENSG00000187954	CYHR1	Non-disease gene
1874	ENSG00000183035	CYLC1	Non-disease gene
1875	ENSG00000155833	CYLC2	Non-disease gene
1876	ENSG00000119004	CYP20A1	Non-disease gene
1877	ENSG00000187553	CYP26C1	Non-disease gene
1878	ENSG00000167600	CYP2S1	Non-disease gene
1879	ENSG00000146233	CYP39A1	Non-disease gene
1880	ENSG00000186377	CYP4X1	Non-disease gene
1881	ENSG00000180432	CYP8B1	Non-disease gene
1882	ENSG00000205795	CYS1	Non-disease gene
1883	ENSG00000173198	CYSLTR1	Non-disease gene
1884	ENSG00000108669	CYTH1	Non-disease gene
1885	ENSG00000105443	CYTH2	Non-disease gene
1886	ENSG00000008256	CYTH3	Non-disease gene
1887	ENSG00000100055	CYTH4	Non-disease gene
1888	ENSG00000115165	CYTIP	Non-disease gene
1889	ENSG00000170891	CYTL1	Non-disease gene
1890	ENSG00000128487	CYTSB	Non-disease gene
1891	ENSG00000166265	CYYR1	Non-disease gene
1892	ENSG00000100592	DAAM1	Non-disease gene
1893	ENSG00000146122	DAAM2	Non-disease gene
1894	ENSG00000165617	DACT1	Non-disease gene
1895	ENSG00000164488	DACT2	Non-disease gene
1896	ENSG00000197380	DACT3	Non-disease gene
1897	ENSG00000134780	DAGLA	Non-disease gene
1898	ENSG00000164535	DAGLB	Non-disease gene
1899	ENSG00000149476	DAK	Non-disease gene
1900	ENSG00000178149	DALRD3	Non-disease gene
1901	ENSG00000179284	DAND5	Non-disease gene
1902	ENSG00000035664	DAPK2	Non-disease gene
1903	ENSG00000167657	DAPK3	Non-disease gene
1904	ENSG00000070190	DAPP1	Non-disease gene
1905	ENSG00000003249	DBNDD1	Non-disease gene
1906	ENSG00000244274	DBNDD2	Non-disease gene
1907	ENSG00000136279	DBNL	Non-disease gene
1908	ENSG00000138231	DBR1	Non-disease gene
1909	ENSG00000109851	DBX1	Non-disease gene
1910	ENSG00000185610	DBX2	Non-disease gene
1911	ENSG00000122741	DCAF10	Non-disease gene
1912	ENSG00000100897	DCAF11	Non-disease gene
1913	ENSG00000198876	DCAF12	Non-disease gene
1914	ENSG00000132017	DCAF15	Non-disease gene
1915	ENSG00000139990	DCAF5	Non-disease gene
1916	ENSG00000136485	DCAF7	Non-disease gene
1917	ENSG00000132716	DCAF8	Non-disease gene
1918	ENSG00000226372	DCAF8L1	Non-disease gene
1919	ENSG00000172992	DCAKD	Non-disease gene
1920	ENSG00000164465	DCBLD1	Non-disease gene
1921	ENSG00000057019	DCBLD2	Non-disease gene
1922	ENSG00000222046	DCDC2B	Non-disease gene
1923	ENSG00000170390	DCLK2	Non-disease gene
1924	ENSG00000163673	DCLK3	Non-disease gene
1925	ENSG00000198924	DCLRE1A	Non-disease gene
1926	ENSG00000110063	DCPS	Non-disease gene
1927	ENSG00000163357	DCST1	Non-disease gene
1928	ENSG00000175203	DCTN2	Non-disease gene
1929	ENSG00000132912	DCTN4	Non-disease gene
1930	ENSG00000166847	DCTN5	Non-disease gene
1931	ENSG00000179958	DCTPP1	Non-disease gene
1932	ENSG00000150401	DCUN1D2	Non-disease gene
1933	ENSG00000188215	DCUN1D3	Non-disease gene
1934	ENSG00000109184	DCUN1D4	Non-disease gene
1935	ENSG00000137692	DCUN1D5	Non-disease gene
1936	ENSG00000130311	DDA1	Non-disease gene
1937	ENSG00000100523	DDHD1	Non-disease gene
1938	ENSG00000170967	DDI1	Non-disease gene
1939	ENSG00000197312	DDI2	Non-disease gene
1940	ENSG00000168209	DDIT4	Non-disease gene
1941	ENSG00000145358	DDIT4L	Non-disease gene
1942	ENSG00000181418	DDN	Non-disease gene
1943	ENSG00000203797	DDO	Non-disease gene
1944	ENSG00000198171	DDRGK1	Non-disease gene
1945	ENSG00000168872	DDX19A	Non-disease gene
1946	ENSG00000157349	DDX19B	Non-disease gene
1947	ENSG00000174243	DDX23	Non-disease gene
1948	ENSG00000165359	DDX26B	Non-disease gene
1949	ENSG00000124228	DDX27	Non-disease gene
1950	ENSG00000182810	DDX28	Non-disease gene
1951	ENSG00000125485	DDX31	Non-disease gene
1952	ENSG00000152670	DDX4	Non-disease gene
1953	ENSG00000145833	DDX46	Non-disease gene
1954	ENSG00000105671	DDX49	Non-disease gene
1955	ENSG00000141141	DDX52	Non-disease gene
1956	ENSG00000123064	DDX54	Non-disease gene
1957	ENSG00000111364	DDX55	Non-disease gene
1958	ENSG00000118197	DDX59	Non-disease gene
1959	ENSG00000137628	DDX60	Non-disease gene
1960	ENSG00000242612	DECR2	Non-disease gene
1961	ENSG00000158796	DEDD	Non-disease gene
1962	ENSG00000160570	DEDD2	Non-disease gene
1963	ENSG00000140995	DEF8	Non-disease gene
1964	ENSG00000215545	DEFB116	Non-disease gene
1965	ENSG00000131068	DEFB118	Non-disease gene
1966	ENSG00000178591	DEFB125	Non-disease gene
1967	ENSG00000125903	DEFB129	Non-disease gene
1968	ENSG00000168350	DEGS2	Non-disease gene
1969	ENSG00000119522	DENND1A	Non-disease gene
1970	ENSG00000213047	DENND1B	Non-disease gene
1971	ENSG00000205744	DENND1C	Non-disease gene
1972	ENSG00000146966	DENND2A	Non-disease gene
1973	ENSG00000175984	DENND2C	Non-disease gene
1974	ENSG00000162777	DENND2D	Non-disease gene
1975	ENSG00000105339	DENND3	Non-disease gene
1976	ENSG00000198837	DENND4B	Non-disease gene
1977	ENSG00000137145	DENND4C	Non-disease gene
1978	ENSG00000184014	DENND5A	Non-disease gene
1979	ENSG00000035499	DEPDC1B	Non-disease gene
1980	ENSG00000155792	DEPDC6	Non-disease gene
1981	ENSG00000121690	DEPDC7	Non-disease gene
1982	ENSG00000072849	DERL2	Non-disease gene
1983	ENSG00000099958	DERL3	Non-disease gene
1984	ENSG00000140543	DET1	Non-disease gene
1985	ENSG00000062282	DGAT2	Non-disease gene
1986	ENSG00000184210	DGAT2L6	Non-disease gene
1987	ENSG00000128191	DGCR8	Non-disease gene
1988	ENSG00000136267	DGKB	Non-disease gene
1989	ENSG00000153933	DGKE	Non-disease gene
1990	ENSG00000102780	DGKH	Non-disease gene
1991	ENSG00000157680	DGKI	Non-disease gene
1992	ENSG00000149091	DGKZ	Non-disease gene
1993	ENSG00000104808	DHDH	Non-disease gene
1994	ENSG00000095059	DHPS	Non-disease gene
1995	ENSG00000157379	DHRS1	Non-disease gene
1996	ENSG00000108272	DHRS11	Non-disease gene
1997	ENSG00000167536	DHRS13	Non-disease gene
1998	ENSG00000100867	DHRS2	Non-disease gene
1999	ENSG00000162496	DHRS3	Non-disease gene
[truncated: 5,579 more rows]
